# Supplementary material for: Quinoline based mono- and bis-(thio)carbohydrazones: synthesis, anticancer activity in 2D and 3D cancer and cancer stem cell models
Source: Royal Society of Chemistry journal article supplement (doi:10.1039/c6ra23940d), 2016-01-01
Supplement: c6ra23940d1.pdf [file c6ra23940d1.pdf]

## Electronic Supplementary Information

### **Quinoline based mono- and bis-(thio)carbohydrazones: synthesis, anticancer activity in 2D and 3D cancer and cancer stem cell models**

Aleksandra Božić,<sup>a</sup> Aleksandar Marinković,<sup>a</sup> Snežana Bjelogrić,<sup>b</sup> Tamara R. Todorović,<sup>c</sup>  
Ilija N. Cvijetić,<sup>d</sup> Irena Novaković<sup>e</sup>, Christian D. Muller<sup>f\*</sup> and Nenad R. Filipović<sup>g\*</sup>

<sup>a</sup>*Faculty of Technology and Metallurgy, University of Belgrade, Karnegijeva 4, Belgrade, Serbia*

<sup>b</sup>*National Cancer Research Center of Serbia, Pasterova 14, Belgrade, Serbia*

<sup>c</sup>*Faculty of Chemistry, University of Belgrade, Studentski trg 12-16, Belgrade, Serbia.*

<sup>d</sup>*Innovation Center of the Faculty of Chemistry, University of Belgrade, Studentski trg 12-16, Belgrade, Serbia*

<sup>e</sup>*Institute of Chemistry, Technology and Metallurgy, University of Belgrade, Njegoševa 12, Belgrade, Serbia*

<sup>f</sup>*Institut Pluridisciplinaire Hubert Curien, UMR 7178 CNRS Université de Strasbourg, 67401 Illkirch, France; E-mail: cdmuller@unistra.fr*

<sup>g</sup>*Faculty of Agriculture, University of Belgrade, Nemanjina 6, Belgrade, Serbia; E-mail: nenadf.chem@gmail.com*

\*Corresponding authors:

Dr. Christian D. Muller

**E-mail:** cdmuller@unistra.fr

**Tel:** +33-688285839

**Fax:** +33-368854310

Dr. Nenad Filipović

**E-mail:** nenadf.chem@gmail.com

**Tel:** +381 64 3456-845

**Fax:** +381 11 2184-330

## Content

|                                                                                                                                                                                                                     |    |
|---------------------------------------------------------------------------------------------------------------------------------------------------------------------------------------------------------------------|----|
| Figure S 1. Cell death response in THP-1 cells determined after 24 h incubation with investigated compounds by means of Annexin V/propidium iodide dual staining method. ....                                       | 5  |
| Figure S 2. Concentration-response curves established for 24 h treatment. Standard sigmoidal curves (A) with biphasic curves (B) obtained for THP-1 cells, and sigmoidal (C) curves attained for AsPC-1 cells. .... | 6  |
| Figure S 3. Cell death response in AsPC-1 cells determined after 24 h incubation with investigated compounds by means of Annexin V/propidium iodide dual staining method. ....                                      | 7  |
| Figure S 4. Role of caspases activation in apoptotic death of THP1 cells (A) and AsPC-1 cells (B). ....                                                                                                             | 8  |
| Figure S 5. Changes in expression of CD44 surface marker on AsPC-1 cells assessed after 72 h incubation with S2 (A), S6 (B), and S4 (C). ....                                                                       | 9  |
| Table S 1. Numbering of atoms in carbohydrazone O1-O6 and thiocarbohydrazone S1-S6 used in NMR. ....                                                                                                                | 10 |
| Table S 2. Experimental and calculated <sup>1</sup> H NMR (500 MHz, DMSO- <i>d</i> <sub>6</sub> ) data of O1-O6 .....                                                                                               | 12 |
| Table S 3. Experimental and calculated <sup>1</sup> H NMR (500 MHz, DMSO- <i>d</i> <sub>6</sub> ) data of S1-S6 .....                                                                                               | 13 |
| Table S 4. Experimental and calculated <sup>13</sup> C NMR (126 MHz, DMSO- <i>d</i> <sub>6</sub> ) data of O1-O6 .....                                                                                              | 14 |
| Table S 5. Experimental and calculated <sup>13</sup> C NMR (126 MHz, DMSO- <i>d</i> <sub>6</sub> ) data of S1-S6 .....                                                                                              | 15 |
| Table S 6. Lipinski's pharmacokinetic properties of investigated compounds. ....                                                                                                                                    | 16 |
| <a href="#">Figure S 6. Experimental FT-IR spectra of compound O1-O6. ....</a>                                                                                                                                      | 17 |
| <a href="#">Figure S 7. Experimental FT-IR spectra of compound S1-S6. ....</a>                                                                                                                                      | 18 |
| <a href="#">Figure S 8. <sup>1</sup>H NMR spectrum of O1 in DMSO-<i>d</i><sub>6</sub>. ....</a>                                                                                                                     | 19 |
| <a href="#">Figure S 9. <sup>13</sup>C NMR spectrum of O1 in DMSO-<i>d</i><sub>6</sub>. ....</a>                                                                                                                    | 19 |
| <a href="#">Figure S 10. COSY spectrum of O1. ....</a>                                                                                                                                                              | 20 |
| <a href="#">Figure S 11. NOESY spectrum of O1. ....</a>                                                                                                                                                             | 20 |
| <a href="#">Figure S 12. <sup>1</sup>H-<sup>13</sup>C HSQC spectrum of O1. ....</a>                                                                                                                                 | 21 |
| <a href="#">Figure S 13. <sup>1</sup>H-<sup>13</sup>C HMBC spectrum of O1. ....</a>                                                                                                                                 | 21 |
| <a href="#">Figure S 14. <sup>1</sup>H NMR spectrum of O2 in DMSO-<i>d</i><sub>6</sub>. ....</a>                                                                                                                    | 22 |
| <a href="#">Figure S 15. <sup>13</sup>C NMR spectrum of O2 in DMSO-<i>d</i><sub>6</sub>. ....</a>                                                                                                                   | 22 |
| <a href="#">Figure S 16. COSY spectrum of O2. ....</a>                                                                                                                                                              | 23 |
| <a href="#">Figure S 17. NOESY spectrum of O2. ....</a>                                                                                                                                                             | 23 |

|                                                                                              |    |
|----------------------------------------------------------------------------------------------|----|
| <a href="#">Figure S 18. <sup>1</sup>H-<sup>13</sup>C HSQC spectrum of O2.</a>               | 24 |
| <a href="#">Figure S 19. <sup>1</sup>H-<sup>13</sup>C HMBC spectrum of O2.</a>               | 24 |
| <a href="#">Figure S 20. <sup>1</sup>H NMR spectrum of O3 in DMSO-<i>d</i><sub>6</sub>.</a>  | 25 |
| <a href="#">Figure S 21. <sup>13</sup>C NMR spectrum of O3 in DMSO-<i>d</i><sub>6</sub>.</a> | 25 |
| <a href="#">Figure S 22. COSY spectrum of O3.</a>                                            | 26 |
| <a href="#">Figure S 23. NOESY spectrum of O3.</a>                                           | 26 |
| <a href="#">Figure S 24. <sup>1</sup>H-<sup>13</sup>C HSQC spectrum of O3.</a>               | 27 |
| <a href="#">Figure S 25. <sup>1</sup>H-<sup>13</sup>C HMBC spectrum of O3.</a>               | 27 |
| <a href="#">Figure S 26. <sup>1</sup>H NMR spectrum of O4 in DMSO-<i>d</i><sub>6</sub>.</a>  | 28 |
| <a href="#">Figure S 27. <sup>13</sup>C NMR spectrum of O4 in DMSO-<i>d</i><sub>6</sub>.</a> | 28 |
| <a href="#">Figure S 28. COSY spectrum of O4.</a>                                            | 29 |
| <a href="#">Figure S 29. NOESY spectrum of O4.</a>                                           | 29 |
| <a href="#">Figure S 30. <sup>1</sup>H-<sup>13</sup>C HSQC spectrum of O4.</a>               | 30 |
| <a href="#">Figure S 31. <sup>1</sup>H-<sup>13</sup>C HMBC spectrum of O4.</a>               | 30 |
| <a href="#">Figure S 32. <sup>1</sup>H NMR spectrum of O5 in DMSO-<i>d</i><sub>6</sub>.</a>  | 31 |
| <a href="#">Figure S 33. <sup>13</sup>C NMR spectrum of O5 in DMSO-<i>d</i><sub>6</sub>.</a> | 31 |
| <a href="#">Figure S 34. COSY spectrum of O5.</a>                                            | 32 |
| <a href="#">Figure S 35. NOESY spectrum of O5.</a>                                           | 32 |
| <a href="#">Figure S 36. <sup>1</sup>H-<sup>13</sup>C HSQC spectrum of O5.</a>               | 33 |
| <a href="#">Figure S 37. <sup>1</sup>H-<sup>13</sup>C HMBC spectrum of O5.</a>               | 33 |
| <a href="#">Figure S 38. <sup>1</sup>H NMR spectrum of O6 in DMSO-<i>d</i><sub>6</sub>.</a>  | 34 |
| <a href="#">Figure S 39. <sup>13</sup>C NMR spectrum of O6 in DMSO-<i>d</i><sub>6</sub>.</a> | 34 |
| <a href="#">Figure S 40. COSY spectrum of O6.</a>                                            | 35 |
| <a href="#">Figure S 41. NOESY spectrum of O6.</a>                                           | 35 |
| <a href="#">Figure S 42. <sup>1</sup>H-<sup>13</sup>C HSQC spectrum of O6.</a>               | 36 |
| <a href="#">Figure S 43. <sup>1</sup>H-<sup>13</sup>C HMBC spectrum of O6.</a>               | 36 |
| <a href="#">Figure S 44. <sup>1</sup>H NMR spectrum of S1 in DMSO-<i>d</i><sub>6</sub>.</a>  | 37 |
| <a href="#">Figure S 45. <sup>13</sup>C NMR spectrum of S1 in DMSO-<i>d</i><sub>6</sub>.</a> | 37 |

|                                                                                                      |    |
|------------------------------------------------------------------------------------------------------|----|
| <a href="#">Figure S 46. COSY spectrum of S1.</a>                                                    | 38 |
| <a href="#">Figure S 47. NOESY spectrum of S1.</a>                                                   | 38 |
| <a href="#">Figure S 48. <math>^1\text{H}</math>-<math>^{13}\text{C}</math> HSQC spectrum of S1.</a> | 39 |
| <a href="#">Figure S 49. <math>^1\text{H}</math>-<math>^{13}\text{C}</math> HMBC spectrum of S1.</a> | 39 |
| <a href="#">Figure S 50. <math>^1\text{H}</math> NMR spectrum of S2 in DMSO-<math>d_6</math>.</a>    | 40 |
| <a href="#">Figure S 51. <math>^{13}\text{C}</math> NMR spectrum of S2 in DMSO-<math>d_6</math>.</a> | 40 |
| <a href="#">Figure S 52. COSY spectrum of S2.</a>                                                    | 41 |
| <a href="#">Figure S 53. NOESY spectrum of S2.</a>                                                   | 41 |
| <a href="#">Figure S 54. <math>^1\text{H}</math>-<math>^{13}\text{C}</math> HSQC spectrum of S2.</a> | 42 |
| <a href="#">Figure S 55. <math>^1\text{H}</math>-<math>^{13}\text{C}</math> HMBC spectrum of S2.</a> | 42 |
| <a href="#">Figure S 56. <math>^1\text{H}</math> NMR spectrum of S3 in DMSO-<math>d_6</math>.</a>    | 43 |
| <a href="#">Figure S 57. <math>^{13}\text{C}</math> NMR spectrum of S3 in DMSO-<math>d_6</math>.</a> | 43 |
| <a href="#">Figure S 58. COSY spectrum of S3.</a>                                                    | 44 |
| <a href="#">Figure S 59. NOESY spectrum of S3.</a>                                                   | 44 |
| <a href="#">Figure S 60. <math>^1\text{H}</math>-<math>^{13}\text{C}</math> HSQC spectrum of S3.</a> | 45 |
| <a href="#">Figure S 61. <math>^1\text{H}</math>-<math>^{13}\text{C}</math> HMBC spectrum of S3.</a> | 45 |
| <a href="#">Figure S 62. <math>^1\text{H}</math> NMR spectrum of S4 in DMSO-<math>d_6</math>.</a>    | 46 |
| <a href="#">Figure S 63. <math>^{13}\text{C}</math> NMR spectrum of S4 in DMSO-<math>d_6</math>.</a> | 46 |
| <a href="#">Figure S 64. COSY spectrum of S4.</a>                                                    | 47 |
| <a href="#">Figure S 65. NOESY spectrum of S4.</a>                                                   | 47 |
| <a href="#">Figure S 66. <math>^1\text{H}</math>-<math>^{13}\text{C}</math> HSQC spectrum of S4.</a> | 48 |
| <a href="#">Figure S 67. <math>^1\text{H}</math>-<math>^{13}\text{C}</math> HMBC spectrum of S4.</a> | 48 |
| <a href="#">Figure S 68. <math>^1\text{H}</math> NMR spectrum of S5 in DMSO-<math>d_6</math>.</a>    | 49 |
| <a href="#">Figure S 69. <math>^{13}\text{C}</math> NMR spectrum of S5 in DMSO-<math>d_6</math>.</a> | 49 |
| <a href="#">Figure S 70. COSY spectrum of S5.</a>                                                    | 50 |
| <a href="#">Figure S 71. NOESY spectrum of S5.</a>                                                   | 50 |
| <a href="#">Figure S 72. <math>^1\text{H}</math>-<math>^{13}\text{C}</math> HSQC spectrum of S5.</a> | 51 |
| <a href="#">Figure S 73. <math>^1\text{H}</math>-<math>^{13}\text{C}</math> HMBC spectrum of S5.</a> | 51 |

|                                                                                              |    |
|----------------------------------------------------------------------------------------------|----|
| <a href="#">Figure S 74. <sup>1</sup>H NMR spectrum of S6 in DMSO-<i>d</i><sub>6</sub>.</a>  | 52 |
| <a href="#">Figure S 75. <sup>13</sup>C NMR spectrum of S6 in DMSO-<i>d</i><sub>6</sub>.</a> | 52 |
| <a href="#">Figure S 76. COSY spectrum of S6.</a>                                            | 53 |
| <a href="#">Figure S 77. NOESY spectrum of S6.</a>                                           | 53 |
| <a href="#">Figure S 78. <sup>1</sup>H-<sup>13</sup>C HSQC spectrum of S6.</a>               | 54 |
| <a href="#">Figure S 79. <sup>1</sup>H-<sup>13</sup>C HMBC spectrum of S6.</a>               | 54 |

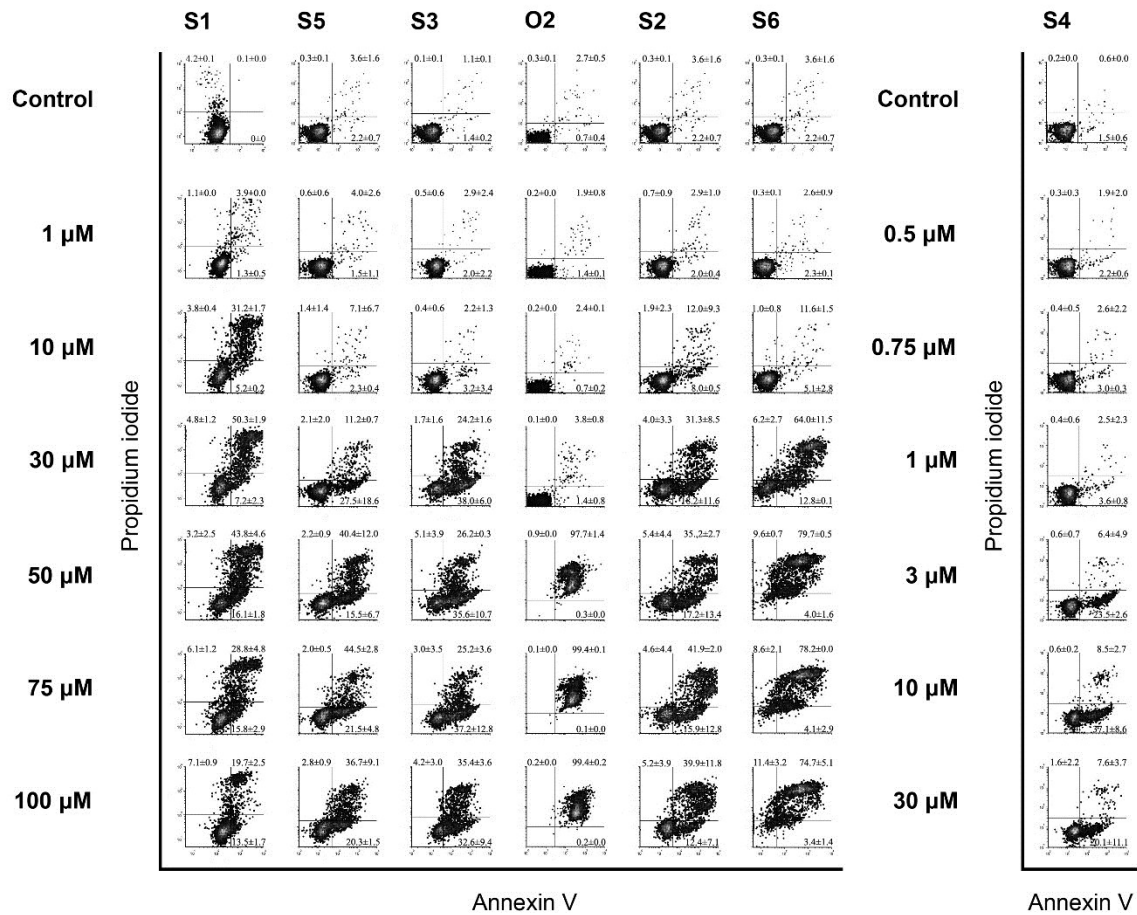

**Figure S 1.** Cell death response in THP-1 cells determined after 24 h incubation with investigated compounds by means of Annexin V/propidium iodide dual staining method.

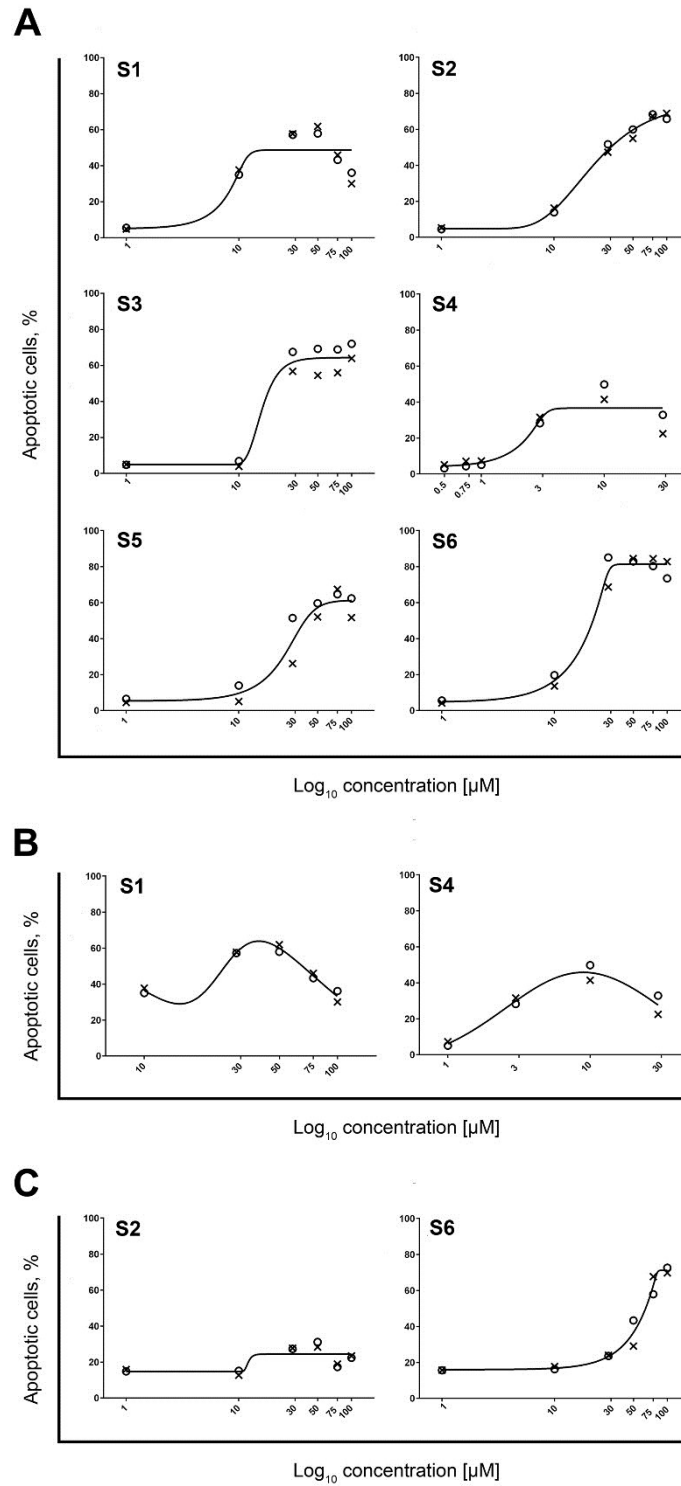

**Figure S 2.** Concentration-response curves established for 24 h treatment. Standard sigmoidal curves (A) with biphasic curves (B) obtained for THP-1 cells, and sigmoidal (C) curves attained for AsPC-1 cells.

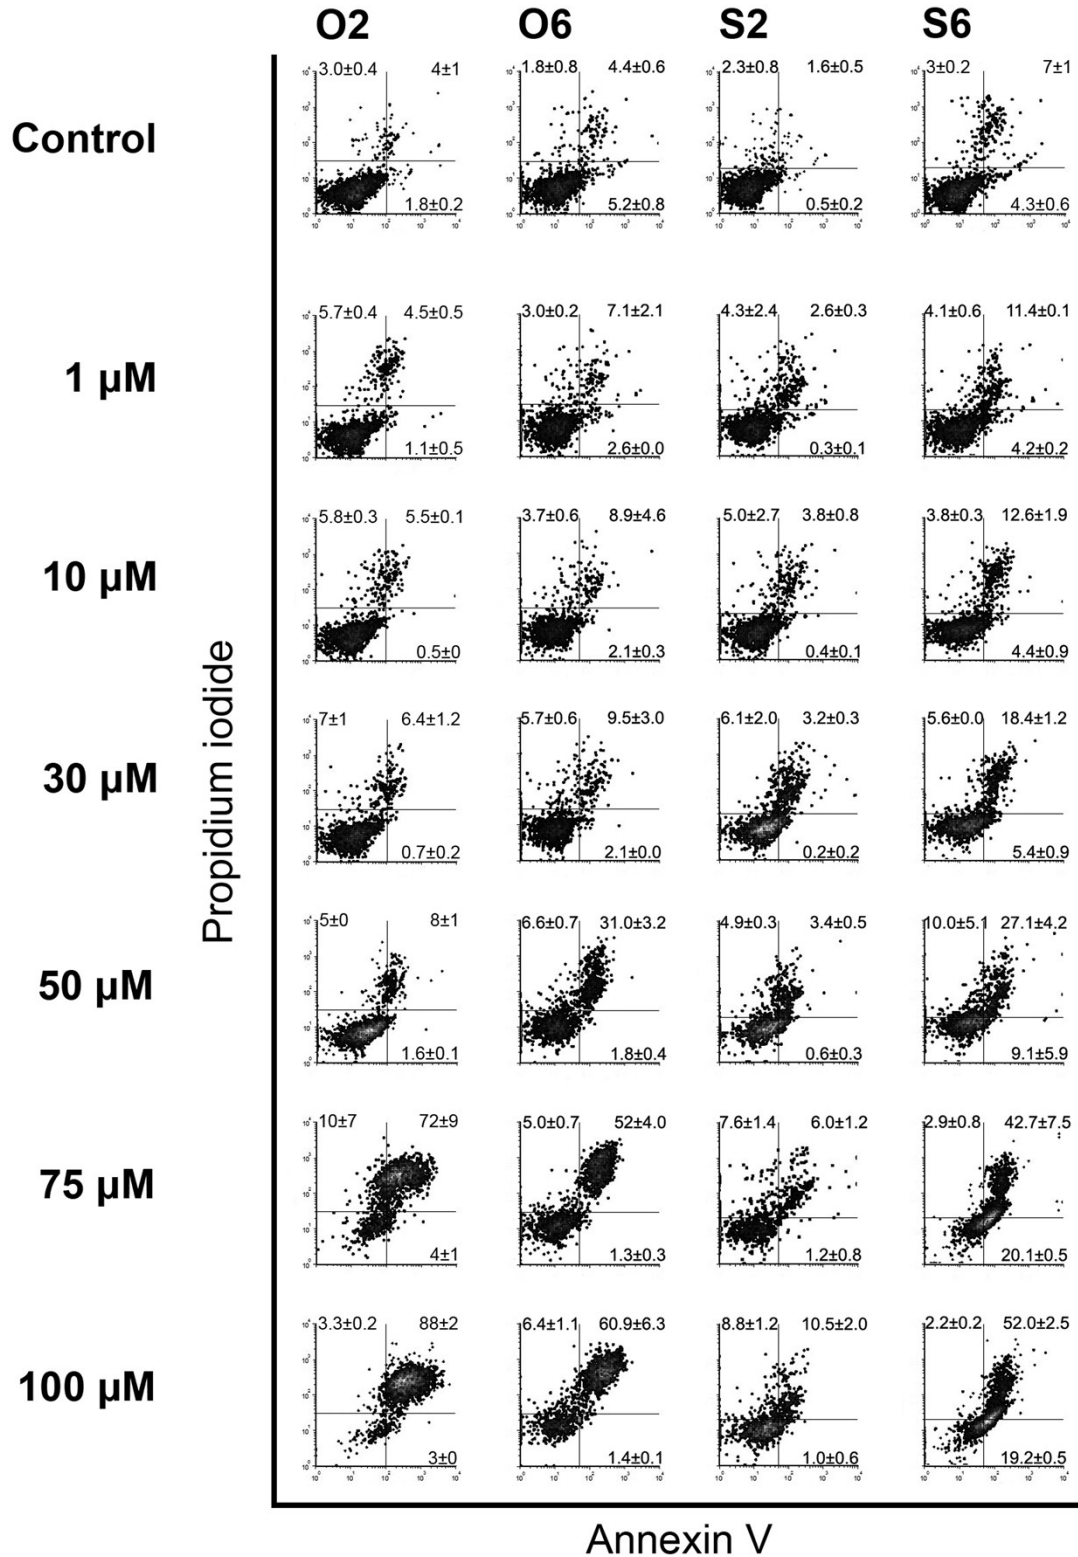

**Figure S 3.** Cell death response in AsPC-1 cells determined after 24 h incubation with investigated compounds by means of Annexin V/propidium iodide dual staining method.



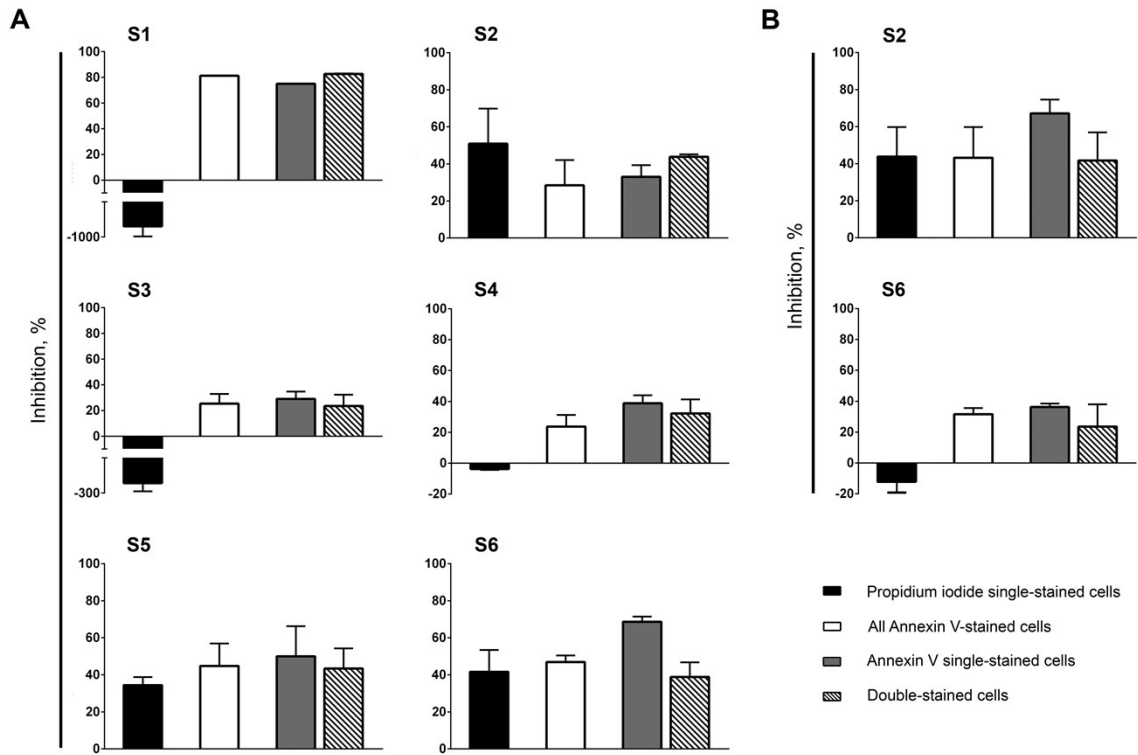

**Figure S 4.** Role of caspases activation in apoptotic death of THP1 cells (A) and AsPC-1 cells (B).

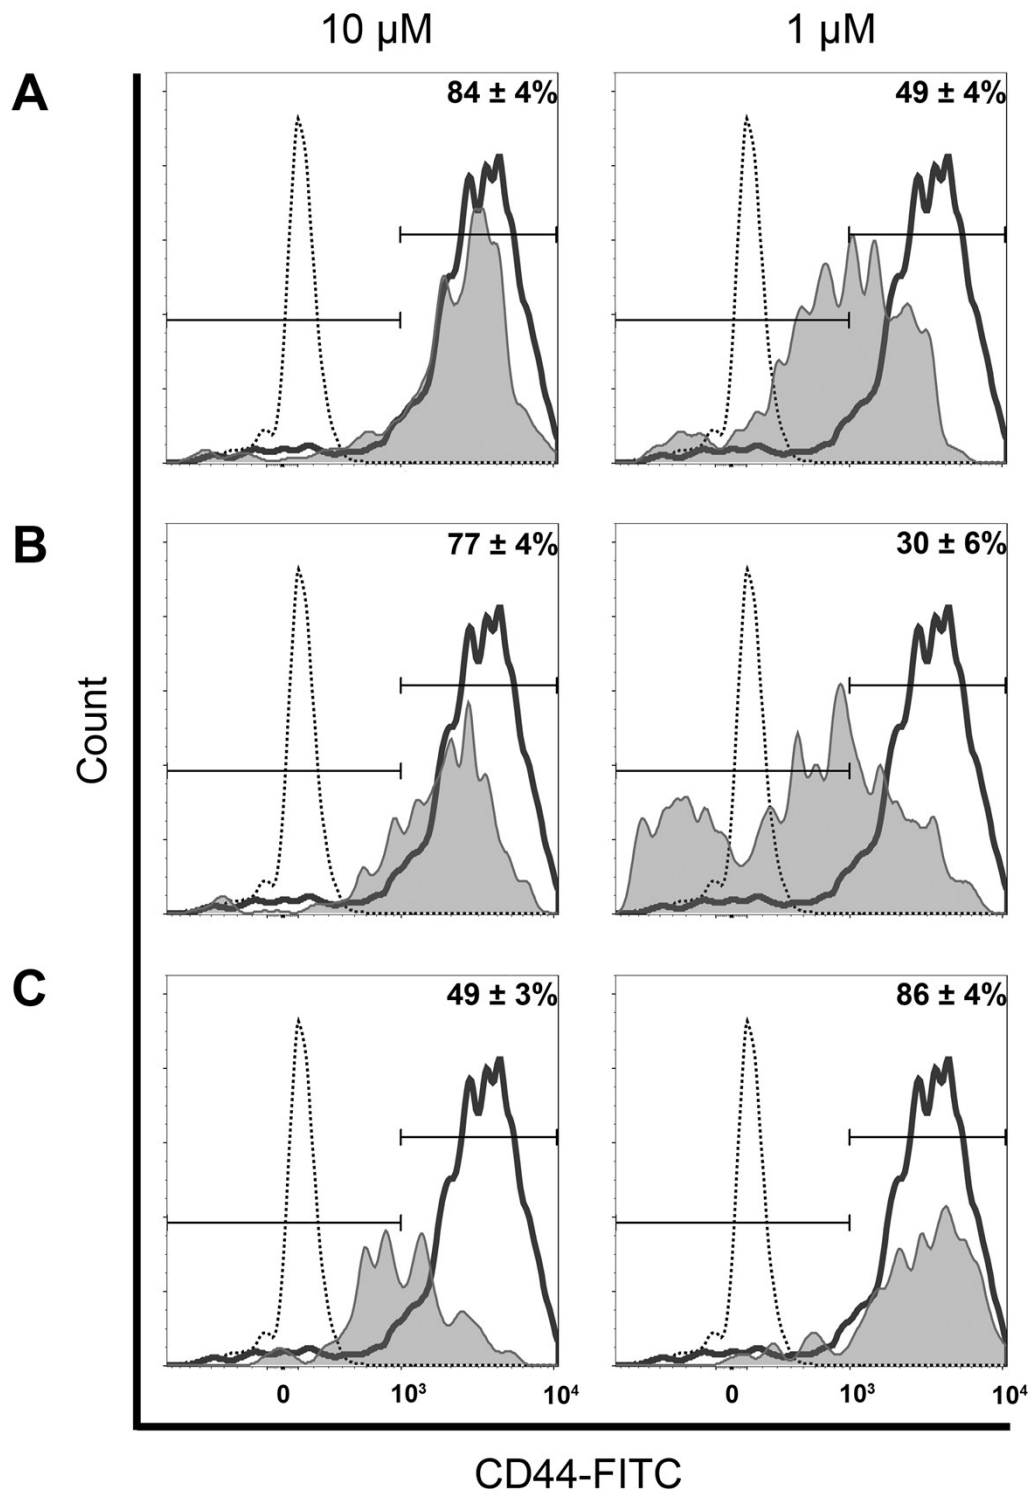

**Figure S 5.** Changes in expression of CD44 surface marker on AsPC-1 cells assessed after 72 h incubation with S2 (A), S6 (B), and S4 (C).

**Table S 1.** Numbering of atoms in carbohydrazone **O1-O6** and thiocarbohydrazone **S1-S6** used in NMR.

|                                                        |  |
|--------------------------------------------------------|--|
| <p><b>O1</b><br/>(X = O)<br/><b>S1</b><br/>(X = S)</p> |  |
| <p><b>O2</b><br/>(X = O)<br/><b>S2</b><br/>(X = S)</p> |  |
| <p><b>O3</b><br/>(X = O)<br/><b>S3</b><br/>(X = S)</p> |  |
| <p><b>o4</b><br/>(X = O)<br/><b>s4</b><br/>(X = S)</p> |  |

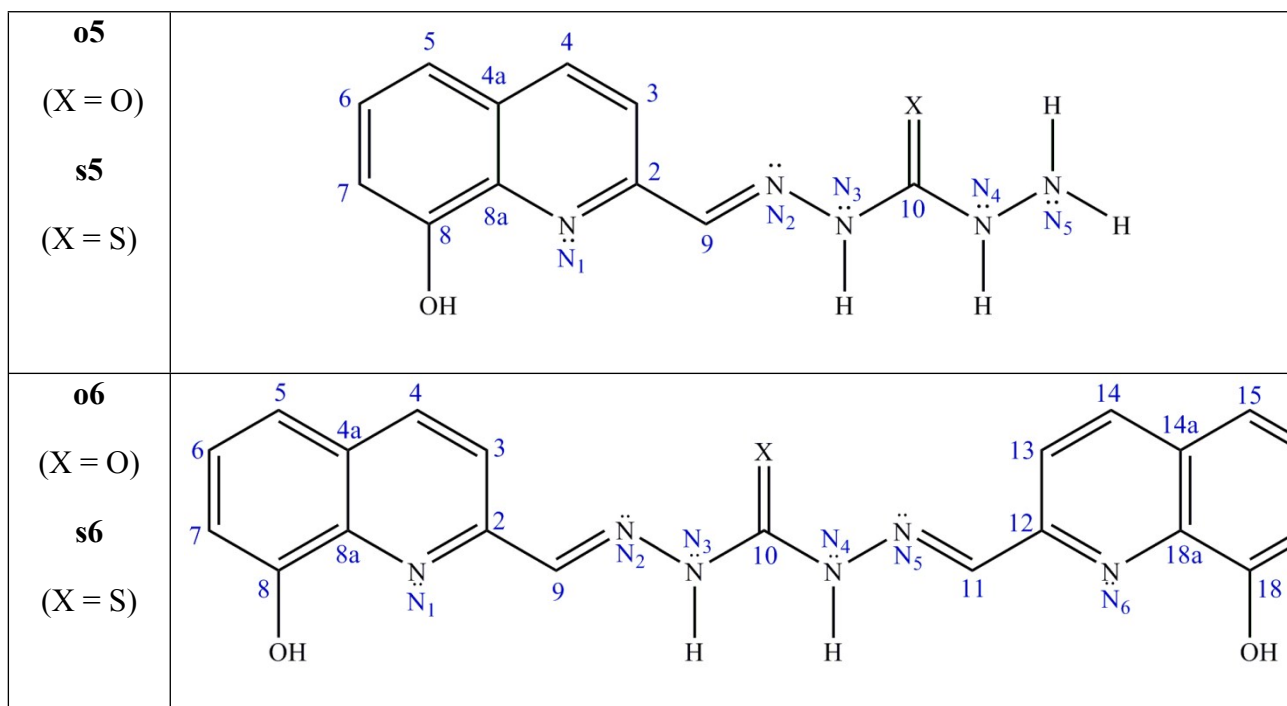

**Table S 2.** Experimental and calculated  $^1\text{H}$  NMR (500 MHz,  $\text{DMSO-}d_6$ ) data of **O1-O6**

| Comp | O1    |              | O2    |       | O3            |              | O4            |       | O5            |              | O6            |       |
|------|-------|--------------|-------|-------|---------------|--------------|---------------|-------|---------------|--------------|---------------|-------|
|      | Exp.  | Calc.        | Exp.  | Calc. | Exp.          | Calc.        | Exp.          | Calc. | Exp.          | Calc.        | Exp.          | Calc. |
| 2    | 8.94  | 9.23         | 8.99  | 9.27  |               |              |               |       |               |              |               |       |
| 3    | 7.57  | 7.76         | 7.61  | 7.79  | 8.34-<br>8.46 | 8.44         | 8.38-<br>8.60 | 8.54  | 8.30-<br>8.50 | 8.47         | 8.17-<br>8.39 | 8.56  |
| 4    | 8.39  | 8.63         | 8.43  | 8.65  | 8.27          | 8.56         | 8.38-<br>8.60 | 8.62  | 8.24          | 8.53         | 8.17-<br>8.39 | 8.59  |
| 5    | 7.98  | 8.27         | 8.04  | 8.31  | 7.93-<br>7.99 | 8.25         | 8.02          | 8.29  | 7.36          | 7.62         | 7.41          | 7.65  |
| 6    | 7.63  | 7.98         | 7.72  | 8.03  | 7.58          | 7.91         | 7.63          | 7.95  | 7.41          | 7.82         | 7.45          | 7.88  |
| 7    | 8.58  | 8.89         | 8.60  | 8.98  | 7.74          | 8.08         | 7.79          | 8.12  | 7.08          | 7.35         | 7.12          | 7.39  |
| 8    |       |              |       |       | 7.93-<br>7.99 | 8.35         | 8.02          | 8.39  | OH<br>9.71    | 7.80         | OH<br>9.80    | 7.83  |
| 9    | 9.14  | 9.25         | 9.50  | 9.40  | 8.03          | 7.92         | 8.31          | 8.08  | 8.09          | 7.93         | 8.48          | 8.09  |
| 11   |       |              | 9.50  | 9.40  |               |              | 8.31          | 8.08  |               |              | 8.48          | 8.09  |
| 12   |       |              |       |       |               |              |               |       |               |              |               |       |
| 13   |       |              | 8.60  | 8.98  |               |              | 8.38-<br>8.60 | 8.54  |               |              | 8.17-<br>8.39 | 8.56  |
| 14   |       |              | 7.72  | 8.03  |               |              | 8.38-<br>8.60 | 8.62  |               |              | 8.17-<br>8.39 | 8.59  |
| 15   |       |              | 8.04  | 8.31  |               |              | 8.02          | 8.29  |               |              | 7.41          | 7.65  |
| 16   |       |              | 8.43  | 8.65  |               |              | 7.63          | 7.95  |               |              | 7.45          | 7.88  |
| 17   |       |              | 7.61  | 7.79  |               |              | 7.79          | 8.12  |               |              | 7.12          | 7.39  |
| 18   |       |              | 8.99  | 9.27  |               |              | 8.02          | 8.39  |               |              | OH<br>9.80    | 7.83  |
| N3   | 10.65 | 7.38         | 11.09 | 7.67  | 10.84         | 7.47         | 11.31         | 7.73  | 10.88         | 7.50         | 11.34         | 7.75  |
| N4   | 8.16  | 5.02         | 11.09 | 7.67  | 8.34-<br>8.46 | 5.13         | 11.31         | 7.73  | 8.30-<br>8.50 | 5.13         | 11.34         | 7.75  |
| N5   | 4.12  | 3.23<br>2.82 | 8.99  |       | 4.15          | 3.20<br>2.80 |               |       | 4.14          | 3.21<br>2.89 |               |       |

**Table S 3.** Experimental and calculated <sup>1</sup>H NMR (500 MHz, DMSO-*d*<sub>6</sub>) data of **S1-S6**

| Comp      | S1    |       | S2        |       | S3    |       | S4        |       | S5         |       | S6         |       |
|-----------|-------|-------|-----------|-------|-------|-------|-----------|-------|------------|-------|------------|-------|
|           | Exp.  | Calc. | Exp.      | Calc. | Exp.  | Calc. | Exp.      | Calc. | Exp.       | Calc. | Exp.       | Calc. |
| <b>2</b>  | 8.96  | 9.27  | 9.00      | 9.36  |       |       |           |       |            |       |            |       |
| <b>3</b>  | 7.59  | 7.80  | 7.62      | 7.84  | 8.52  | 8.38  | 8.90      | 8.66  | 8.82       | 8.40  | 8.05-8.41  | 8.68  |
| <b>4</b>  | 8.41  | 8.66  | 8.35-8.64 | 8.70  | 8.34  | 8.61  | 8.46-8.63 | 8.67  | 8.27       | 8.57  | 8.05-8.41  | 8.64  |
| <b>5</b>  | 8.03  | 8.37  | 8.09      | 7.43  | 7.97  | 8.27  | 8.06      | 8.29  | 7.37       | 7.64  | 7.43       | 7.66  |
| <b>6</b>  | 7.65  | 7.99  | 7.75      | 8.06  | 7.59  | 7.96  | 7.67      | 8.00  | 7.42       | 7.87  | 7.43       | 7.92  |
| <b>7</b>  | 8.73  | 8.85  | 8.88      | 9.14  | 7.75  | 8.12  | 7.82      | 8.19  | 7.09       | 7.39  | 7.14       | 7.45  |
| <b>8</b>  |       |       |           |       | 7.97  | 8.40  | 8.06      | 8.46  | OH<br>9.80 | 7.79  | OH<br>9.89 | 7.83  |
| <b>9</b>  | 9.30  | 9.35  | 9.91      | 9.86  | 8.18  | 7.95  | 8.40      | 8.48  | 8.23       | 7.96  | 8.89       | 8.48  |
| <b>11</b> |       |       | 9.48      | 9.48  |       |       | 8.20      | 8.05  |            |       | 8.53       | 8.06  |
| <b>12</b> |       |       |           |       |       |       |           |       |            |       |            |       |
| <b>13</b> |       |       | 8.35-8.64 | 9.04  |       |       | 8.46-8.63 | 8.53  |            |       | 8.05-8.41  | 8.68  |
| <b>14</b> |       |       | 7.75      | 8.11  |       |       | 8.46-8.63 | 8.68  |            |       | 8.05-8.41  | 8.64  |
| <b>15</b> |       |       | 8.09      | 8.41  |       |       | 8.06      | 8.29  |            |       | 7.43       | 7.66  |
| <b>16</b> |       |       | 8.35-8.64 | 8.66  |       |       | 7.67      | 7.98  |            |       | 7.43       | 7.90  |
| <b>17</b> |       |       | 7.62      | 7.82  |       |       | 7.82      | 8.15  |            |       | 7.14       | 7.41  |
| <b>18</b> |       |       | 9.00      | 9.30  |       |       | 8.06      | 8.46  |            |       | OH<br>9.89 | 7.81  |
| <b>N3</b> | 11.67 | 8.26  | 12.18     | 10.37 | 11.78 | 8.31  | 12.51     | 10.33 | 11.84      | 8.31  | 12.52      | 10.31 |
| <b>N4</b> | 9.95  | 7.91  | 12.10     | 8.38  | 10.18 | 7.95  | 12.16     | 8.48  | 10.17      | 7.92  | 12.18      | 8.49  |
| <b>N5</b> | 4.91  | 3.22  |           |       | 4.97  | 3.22  |           |       | 4.96       | 3.22  |            |       |

**Table S 4.** Experimental and calculated  $^{13}\text{C}$  NMR (126 MHz, DMSO- $d_6$ ) data of **O1-O6**

| $\delta$ | O1     |        | O2     |        | O3     |        | O4     |        | O5     |        | O6     |        |
|----------|--------|--------|--------|--------|--------|--------|--------|--------|--------|--------|--------|--------|
|          | Exp    | Calc.  |
| 2        | 150.08 | 150.03 | 150.16 | 150.39 | 154.34 | 153.38 | 151.67 | 152.88 | 152.25 | 151.13 | 151.92 | 150.23 |
| 3        | 121.67 | 120.21 | 121.77 | 119.98 | 118.03 | 115.51 | 117.78 | 115.81 | 118.35 | 116.76 | 118.12 | 117.00 |
| 4        | 136.55 | 137.01 | 136.62 | 137.81 | 136.19 | 137.31 | 136.47 | 137.41 | 136.06 | 137.37 | 136.40 | 137.49 |
| 4a       | 127.94 | 125.93 | 128.02 | 125.36 | 127.66 | 125.50 | 127.99 | 125.83 | 128.52 | 126.32 | 128.75 | 126.60 |
| 5        | 128.90 | 129.02 | 129.28 | 129.69 | 127.72 | 127.43 | 128.84 | 127.36 | 117.74 | 114.86 | 117.90 | 114.86 |
| 6        | 126.45 | 125.33 | 126.49 | 125.26 | 126.84 | 126.29 | 127.79 | 126.64 | 127.73 | 128.56 | 128.13 | 128.95 |
| 7        | 125.61 | 124.17 | 125.72 | 124.65 | 129.82 | 129.13 | 127.11 | 129.20 | 111.59 | 106.68 | 112.13 | 106.80 |
| 8        | 131.59 | 130.68 | 131.65 | 130.19 | 128.69 | 129.02 | 130    | 129.20 | 153.24 | 152.48 | 153.37 | 152.56 |
| 8a       | 145.01 | 143.34 | 145.19 | 143.61 | 147.26 | 145.87 | 147.35 | 145.84 | 137.93 | 134.42 | 138.13 | 134.34 |
| 9        | 136.89 | 135.46 | 139.89 | 136.96 | 140.64 | 139.93 | 144.06 | 142.52 | 140.50 | 138.54 | 144.02 | 141.31 |
| 10       | 157.21 | 153.32 | 152.28 | 146.03 | 156.76 | 152.74 | 153.99 | 145.51 | 156.83 | 152.52 | 162.45 | 145.41 |
| 11       |        |        | 139.89 | 136.96 |        |        | 144.06 | 142.52 |        |        | 144.02 | 141.31 |
| 12       |        |        | 131.65 | 130.19 |        |        | 151.67 | 152.88 |        |        | 151.92 | 150.23 |
| 12a      |        |        | 145.19 | 143.61 |        |        |        |        |        |        |        |        |
| 13       |        |        | 125.72 | 124.65 |        |        | 117.78 | 115.81 |        |        | 118.12 | 117.00 |
| 14       |        |        | 126.49 | 125.26 |        |        | 136.47 | 137.41 |        |        | 136.40 | 137.49 |
| 14a      |        |        |        |        |        |        | 127.99 | 125.83 |        |        | 128.75 | 126.60 |

|                 |  |  |            |            |  |  |            |            |  |  |            |            |
|-----------------|--|--|------------|------------|--|--|------------|------------|--|--|------------|------------|
| <b>15</b>       |  |  | 128.<br>28 | 129.<br>69 |  |  | 128.<br>84 | 127.<br>36 |  |  | 117.<br>90 | 114.<br>86 |
| <b>15<br/>a</b> |  |  | 128.<br>02 | 127.<br>66 |  |  |            |            |  |  |            |            |
| <b>16</b>       |  |  | 136.<br>62 | 137.<br>81 |  |  | 127.<br>79 | 126.<br>64 |  |  | 128.<br>13 | 128.<br>95 |
| <b>17</b>       |  |  | 121.<br>77 | 119.<br>98 |  |  | 127.<br>11 | 129.<br>20 |  |  | 112.<br>13 | 106.<br>80 |
| <b>18</b>       |  |  | 150.<br>16 | 150.<br>39 |  |  | 130        | 129.<br>20 |  |  | 153.<br>37 | 152.<br>56 |
| <b>18<br/>a</b> |  |  |            |            |  |  | 147.<br>35 | 145.<br>84 |  |  | 138.<br>13 | 134.<br>34 |

**Table S 5.** Experimental and calculated  $^{13}\text{C}$  NMR (126 MHz, DMSO- $d_6$ ) data of **S1-S6**

| $\delta$  | <b>S1</b>   |              | <b>S2</b>   |              | <b>S3</b>   |              | <b>S4</b>   |              | <b>S5</b>   |              | <b>S6</b>   |              |
|-----------|-------------|--------------|-------------|--------------|-------------|--------------|-------------|--------------|-------------|--------------|-------------|--------------|
|           | <b>Exp.</b> | <b>Calc.</b> |
| <b>2</b>  | 150.29      | 150.67       | 150.34      | 150.999      | 153.68      | 151.86       | 153.96      | 152.12       | 151.95      | 149.01       | 151.60      | 149.48       |
| <b>3</b>  | 121.75      | 120.65       | 121.85      | 120.87       | 118         | 115.55       | 118.72      | 116.21       | 118.65      | 116.73       | 118.62      | 117.40       |
| <b>4</b>  | 136.59      | 137.69       | 136.65      | 137.64       | 135.89      | 137.77       | 136.98      | 137.61       | 136.03      | 137.77       | 136.48      | 137.67       |
| <b>4a</b> | 127.94      | 125.87       | 128.01      | 125.91       | 127.46      | 126.00       | 128.23      | 126.03       | 128.71      | 126.91       | 128.90      | 126.92       |
| <b>5</b>  | 129.59      | 131.14       | 129.99      | 131.07       | 127.57      | 127.45       | 128.37      | 127.33       | 117.71      | 114.87       | 117.87      | 114.75       |
| <b>6</b>  | 126.40      | 125.19       | 126.48      | 125.21       | 126.75      | 127.23       | 127.75      | 127.27       | 127.97      | 129.71       | 128.38      | 129.63       |
| <b>7</b>  | 126.33      | 125.44       | 126.67      | 125.96       | 129.57      | 129.45       | 130.47      | 129.73       | 112         | 107.03       | 112.24      | 107.33       |
| <b>8</b>  | 131.21      | 128.45       | 131.46      | 129.06       | 128.40      | 129.37       | 129.21      | 129.42       | 153.36      | 152.71       | 153.44      | 152.73       |
| <b>8a</b> | 145.30      | 143.83       | 140.36      | 144          | 146.97      | 145.88       | 147.70      | 145.96       | 138.10      | 149.01       | 138.20      | 134.62       |
| <b>9</b>  | 138.97      | 139.68       | 145.40      | 144.54       | 141.98      | 143.57       | 149.59      | 149.27       | 142.16      | 142.25       | 149.17      | 148.00       |
| <b>10</b> | 175.96      | 182.06       | 175.21      | 176.64       | 175.37      | 182.93       | 175.97      | 177.68       | 175.72      | 182.83       | 175.61      | 177.76       |
| <b>11</b> |             |              | 140.48      | 140.21       |             |              | 144.46      | 144.71       |             |              | 143.85      | 143.58       |
| <b>12</b> |             |              | 130.97      | 127.99       |             |              | 152.03      | 151.21       |             |              | 151.60      | 148.40       |



|            |  |  |        |        |  |  |        |        |  |  |        |        |
|------------|--|--|--------|--------|--|--|--------|--------|--|--|--------|--------|
| <b>12a</b> |  |  | 140.30 | 144.16 |  |  |        |        |  |  |        |        |
| <b>13</b>  |  |  | 125.98 | 125.97 |  |  | 118.41 | 115.83 |  |  | 118.62 | 117.00 |
| <b>14</b>  |  |  | 126.48 | 125.18 |  |  | 136.98 | 138.02 |  |  | 136.48 | 138.05 |
| <b>14a</b> |  |  |        |        |  |  | 128.23 | 125.99 |  |  | 128.90 | 126.99 |
| <b>15</b>  |  |  | 129.99 | 131.91 |  |  | 128.37 | 127.59 |  |  | 117.87 | 115.10 |
| <b>15a</b> |  |  | 128.01 | 125.58 |  |  |        |        |  |  |        |        |
| <b>16</b>  |  |  | 136.65 | 138    |  |  | 127.75 | 126.97 |  |  | 128.38 | 129.43 |
| <b>17</b>  |  |  | 121.85 | 120.27 |  |  | 130.47 | 129.70 |  |  | 112.24 | 107.24 |
| <b>18</b>  |  |  | 150.34 | 150.94 |  |  | 129.21 | 129.45 |  |  | 153.44 | 152.68 |
| <b>18a</b> |  |  |        |        |  |  | 147.70 | 145.93 |  |  | 138.20 | 134.75 |

**Table S 6.** Lipinski's pharmacokinetic properties of investigated compounds

|             | <b>O1</b> | <b>S1</b> | <b>O2</b> | <b>S2</b> | <b>O3</b> | <b>S3</b> | <b>O4</b> | <b>S4</b> | <b>O5</b> | <b>S5</b> | <b>O6</b> | <b>S6</b> |
|-------------|-----------|-----------|-----------|-----------|-----------|-----------|-----------|-----------|-----------|-----------|-----------|-----------|
| <b>MW</b>   | 229.24    | 245.30    | 368.39    | 384.46    | 229.24    | 245.30    | 368.39    | 384.46    | 245.24    | 261.30    | 400.39    | 416.46    |
| <b>logP</b> | 1.234     | 1.621     | 4.115     | 4.223     | 1.262     | 1.720     | 3.886     | 4.402     | 0.825     | 1.227     | 3.210     | 3.526     |
| <b>HBD</b>  | 4         | 4         | 2         | 2         | 4         | 4         | 2         | 2         | 5         | 5         | 4         | 4         |
| <b>HBA</b>  | 3         | 2         | 5         | 4         | 3         | 2         | 5         | 4         | 3         | 2         | 5         | 4         |

MW – molecular weight

logP – predicted octanol/water partition coefficient

HBD – number of hydrogen bond donor atoms per molecule

HBA– number of hydrogen bond acceptor atoms per molecule

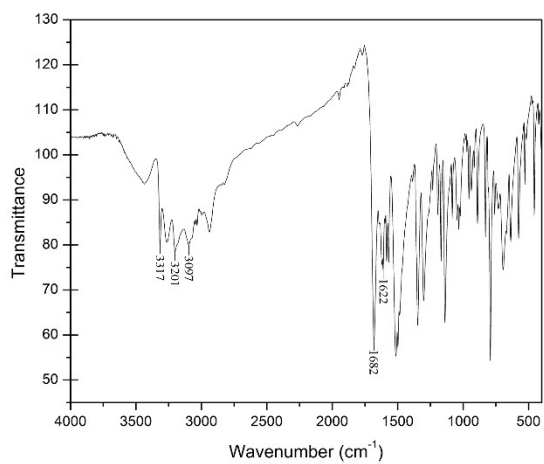

**O1**

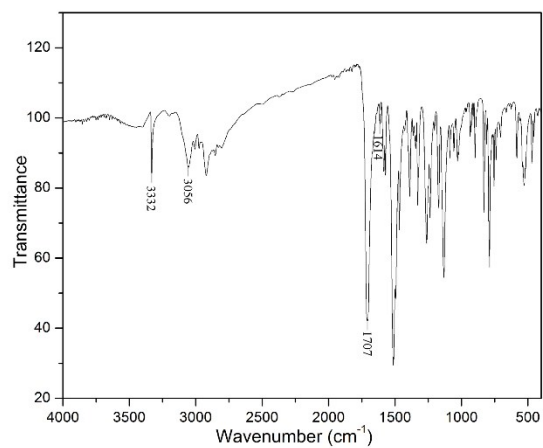

**O2**

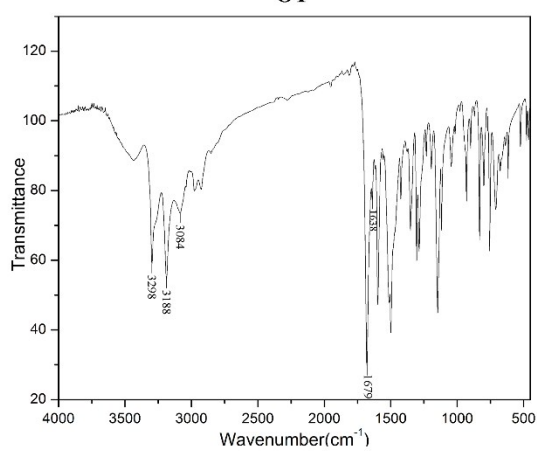

**O3**

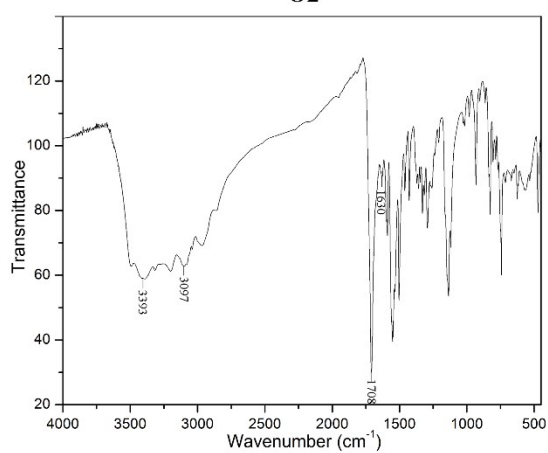

**O4**

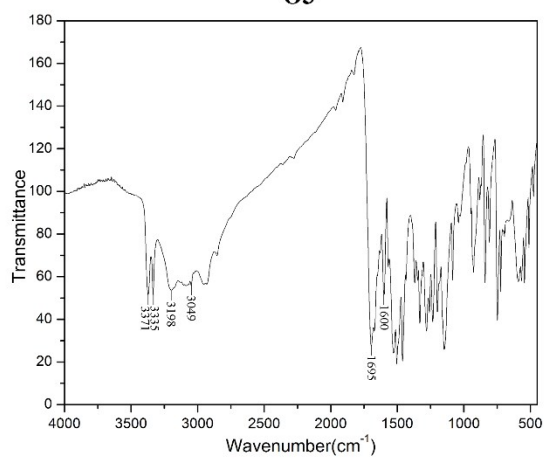

**O5**

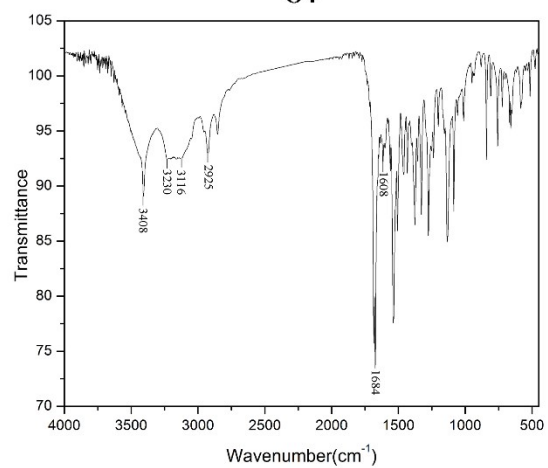

**O6**

**Figure S 6.** Experimental FT-IR spectra of compound O1-O6.

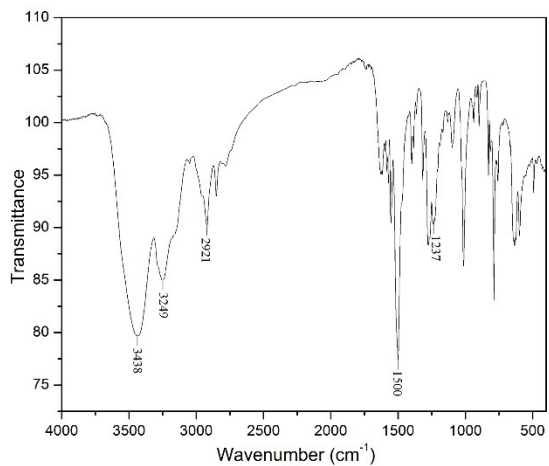

**S1**

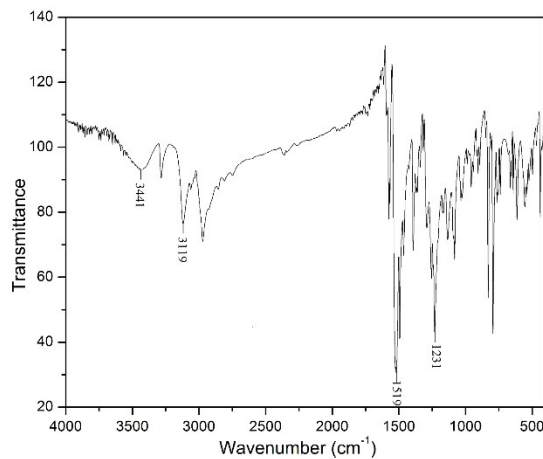

**S2**

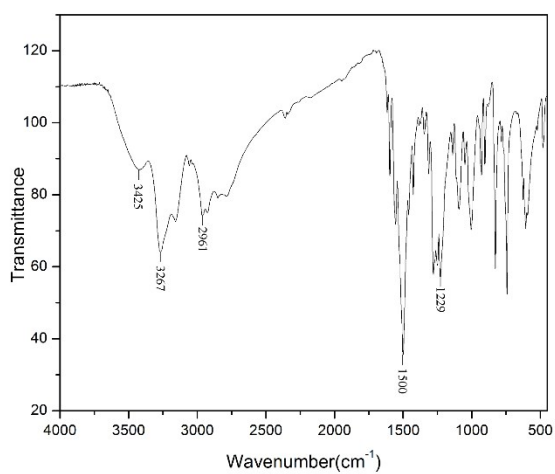

**S3**

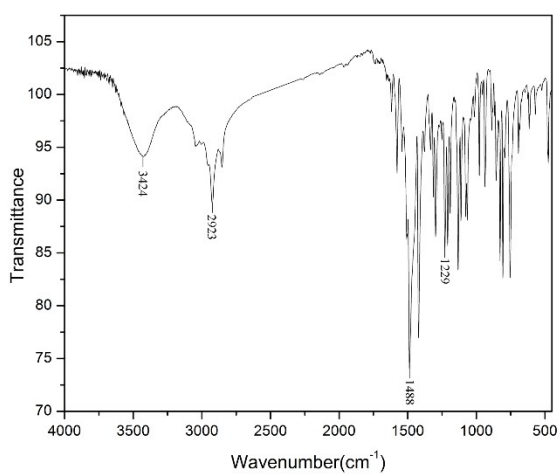

**S4**

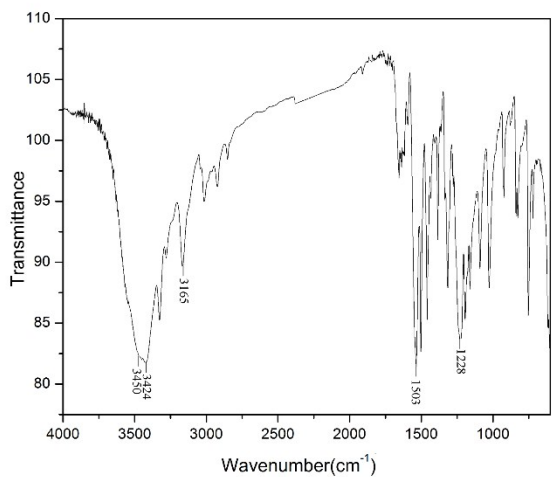

**S5**

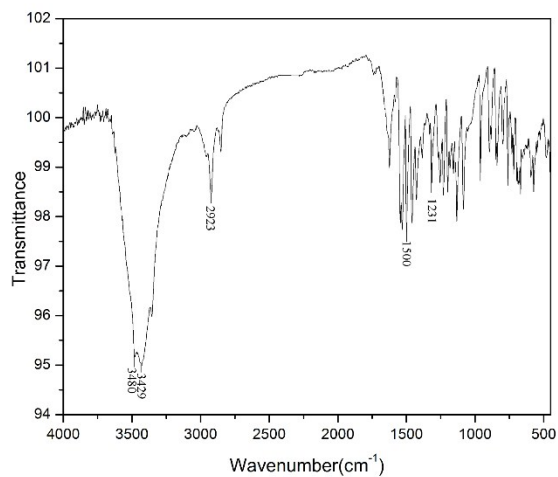

**S6**

**Figure S 7.** Experimental FT-IR spectra of compound S1-S6.

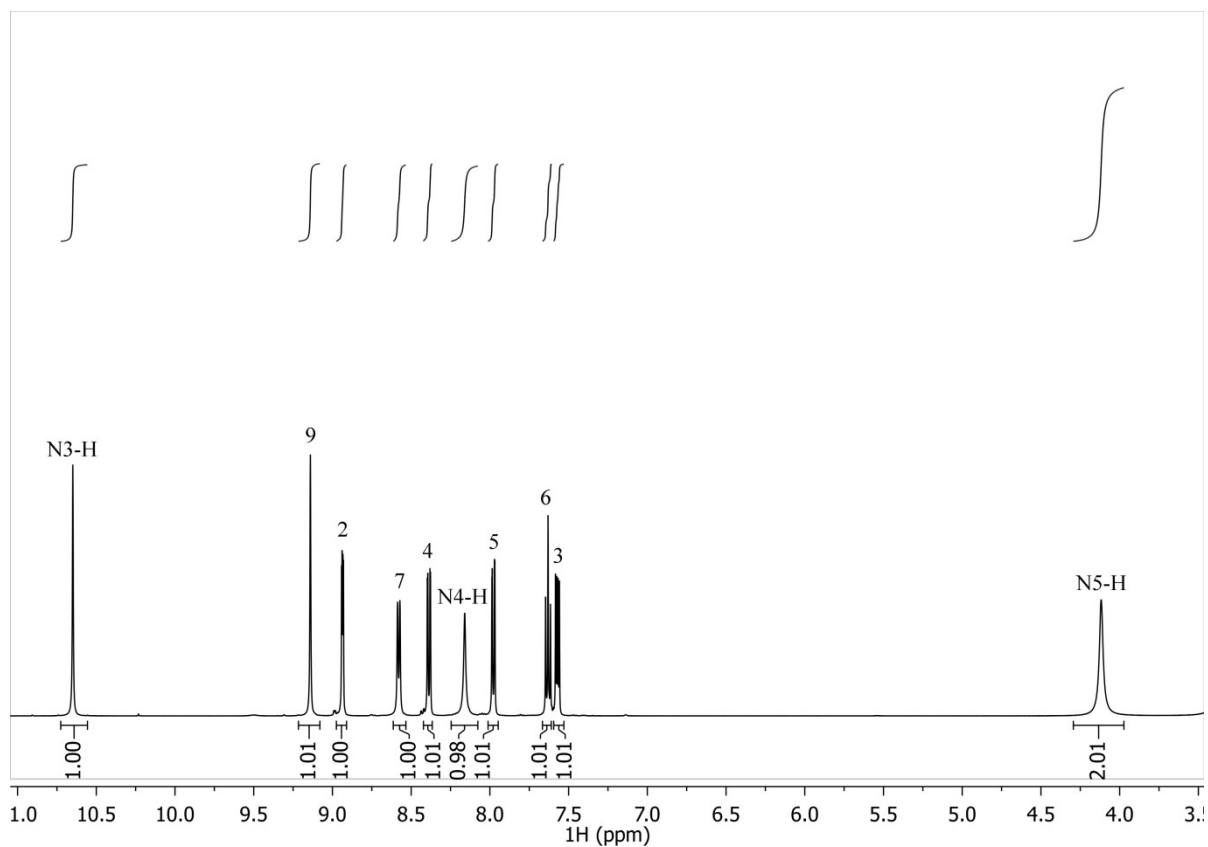

**Figure S 8.**  $^1\text{H}$  NMR spectrum of **O1** in  $\text{DMSO-}d_6$ .

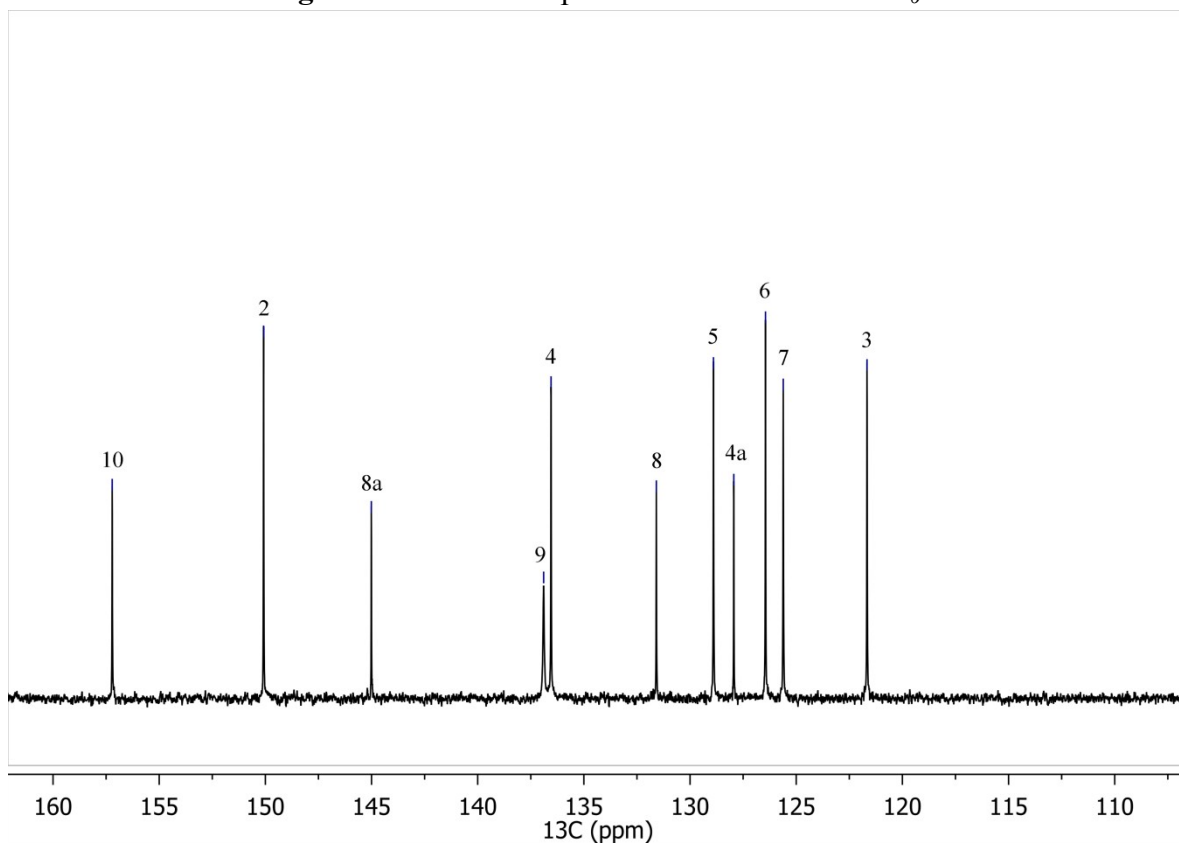

**Figure S 9.**  $^{13}\text{C}$  NMR spectrum of **O1** in  $\text{DMSO-}d_6$ .

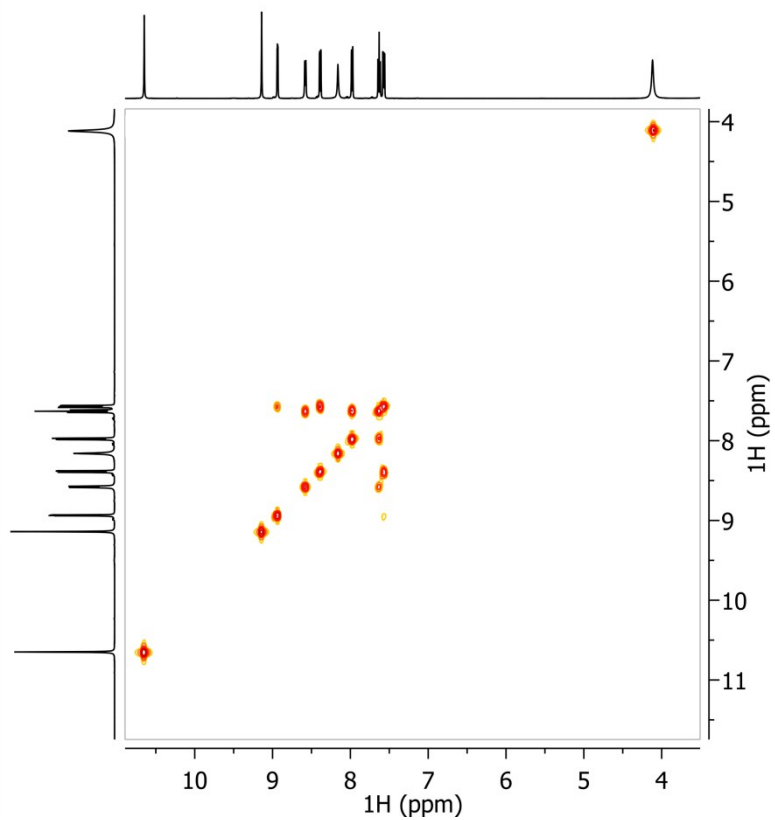

**Figure S 10.** COSY spectrum of **O1**.

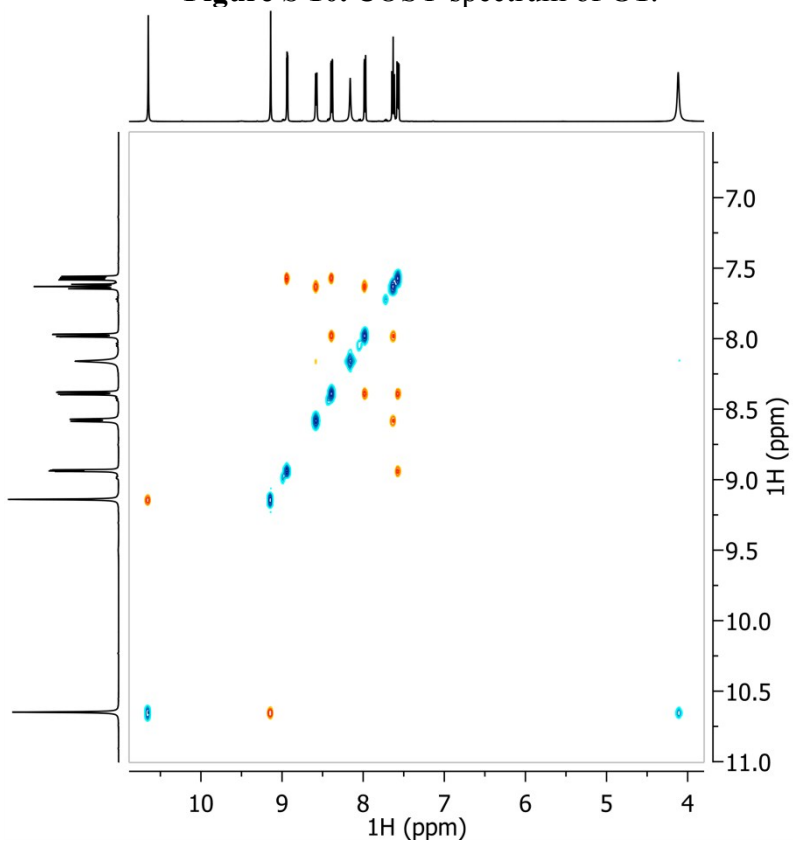

**Figure S 11.** NOESY spectrum of **O1**.

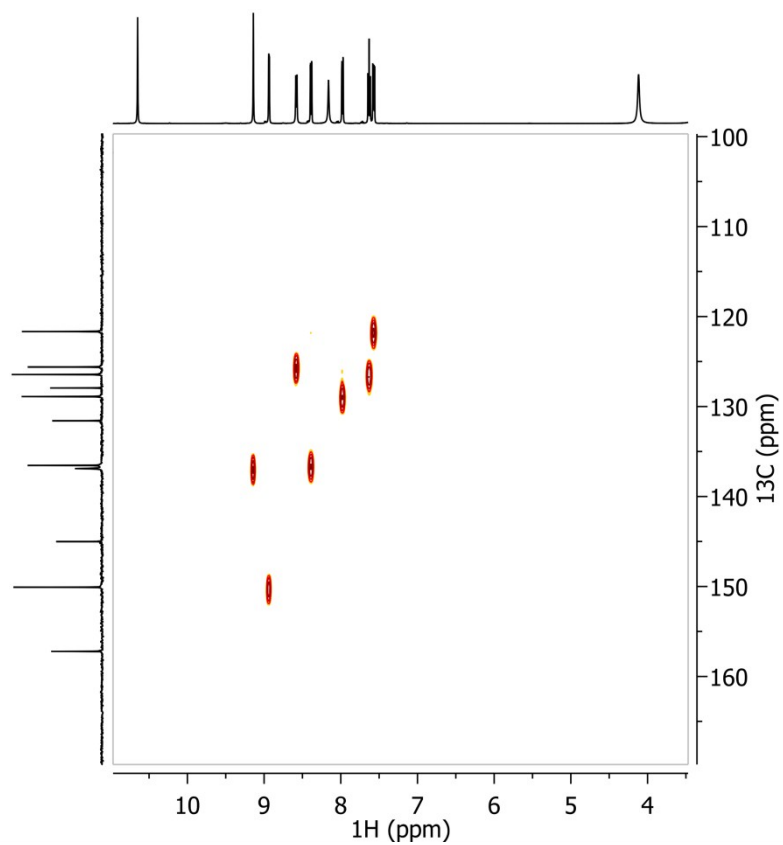

**Figure S 12.**  $^1\text{H}$ - $^{13}\text{C}$  HSQC spectrum of O1.

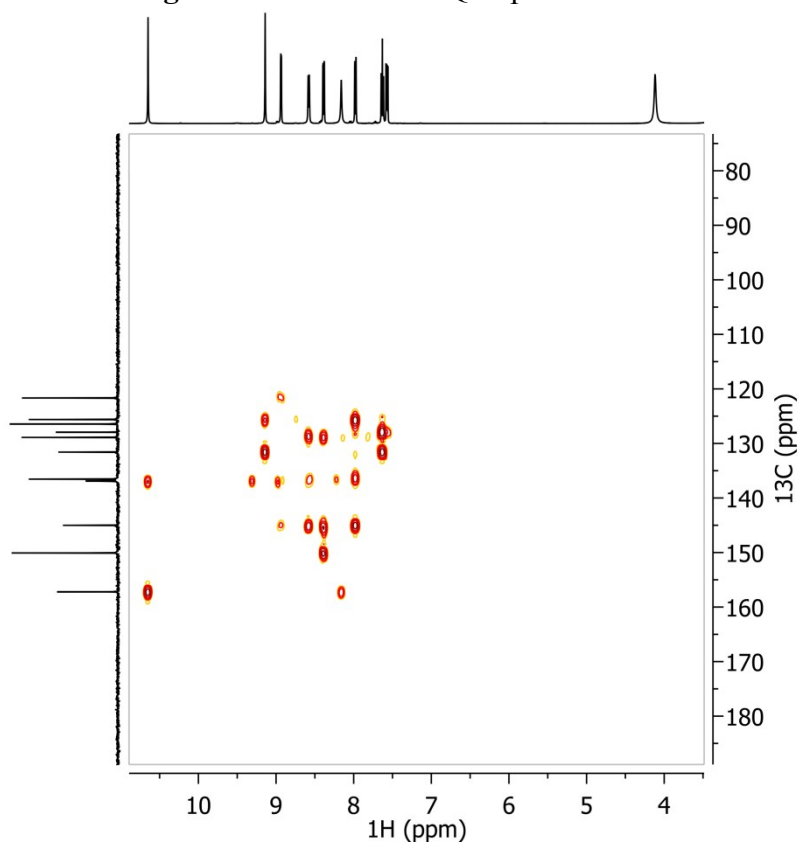

**Figure S 13.**  $^1\text{H}$ - $^{13}\text{C}$  HMBC spectrum of O1.

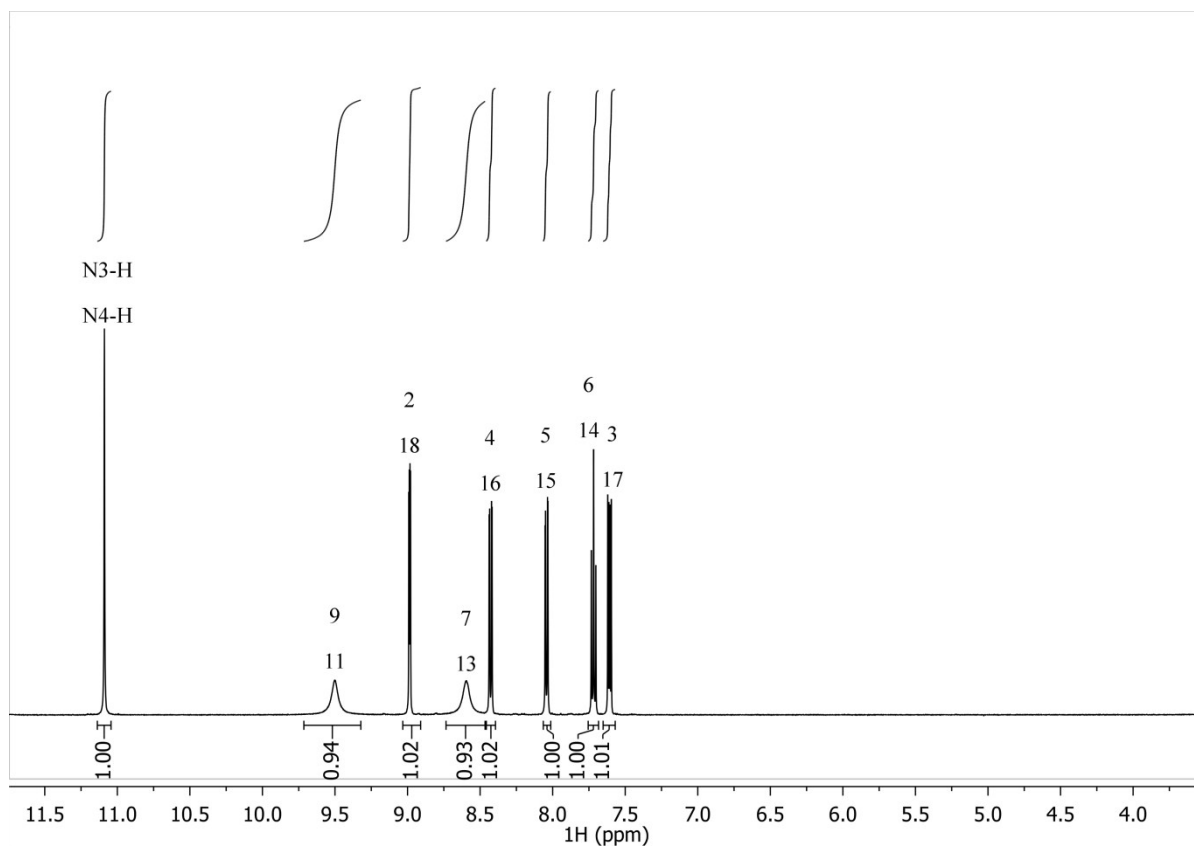

Figure S 14.  $^1\text{H}$  NMR spectrum of **O2** in  $\text{DMSO-}d_6$ .

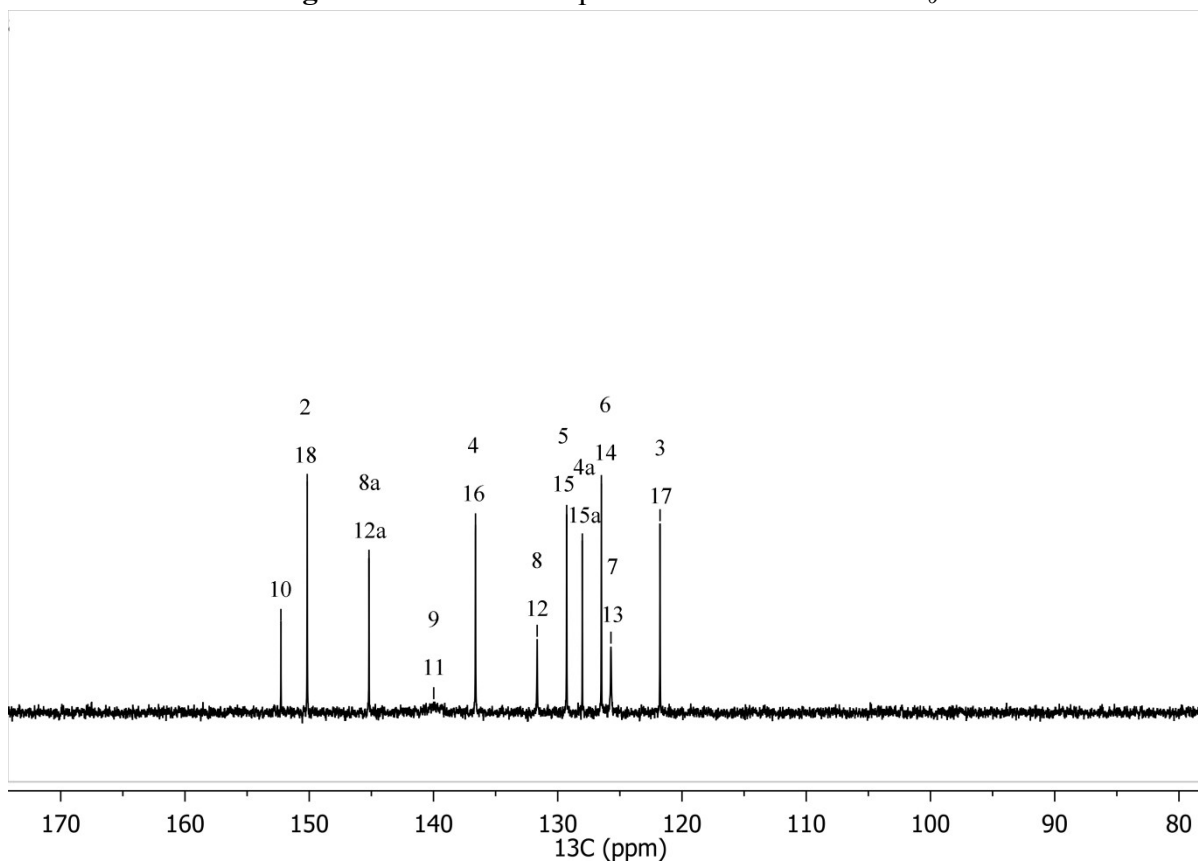

Figure S 15.  $^{13}\text{C}$  NMR spectrum of **O2** in  $\text{DMSO-}d_6$ .

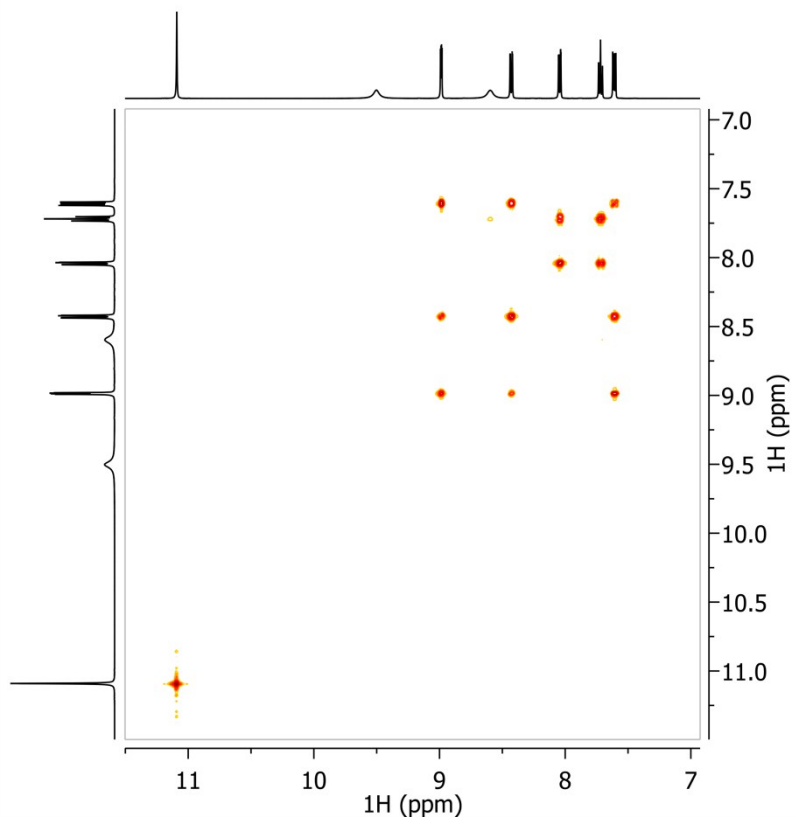

**Figure S 16.** COSY spectrum of **O2**.

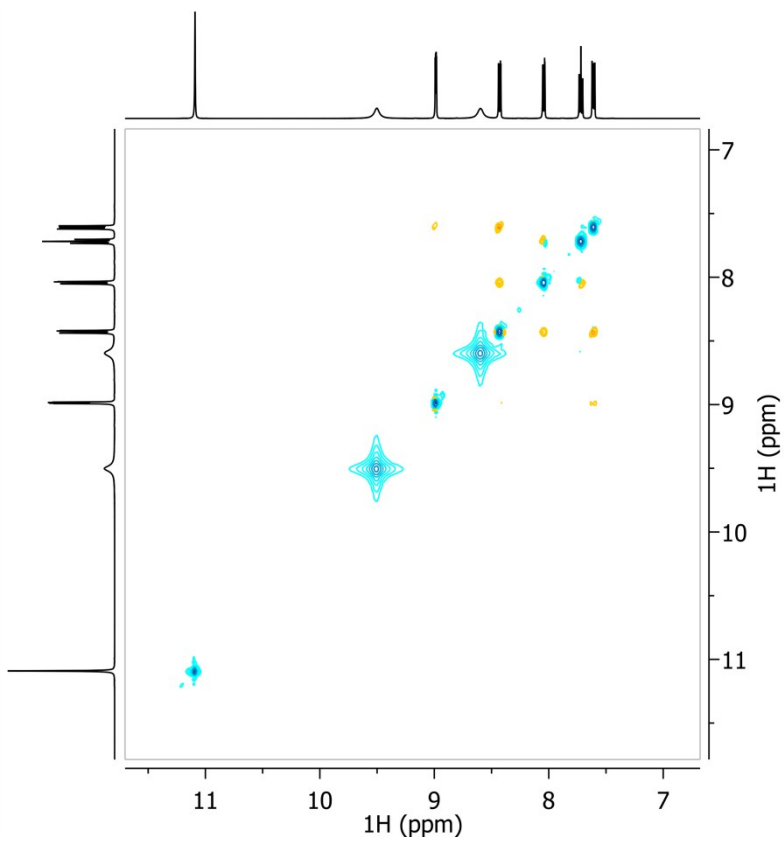

**Figure S 17.** NOESY spectrum of **O2**.



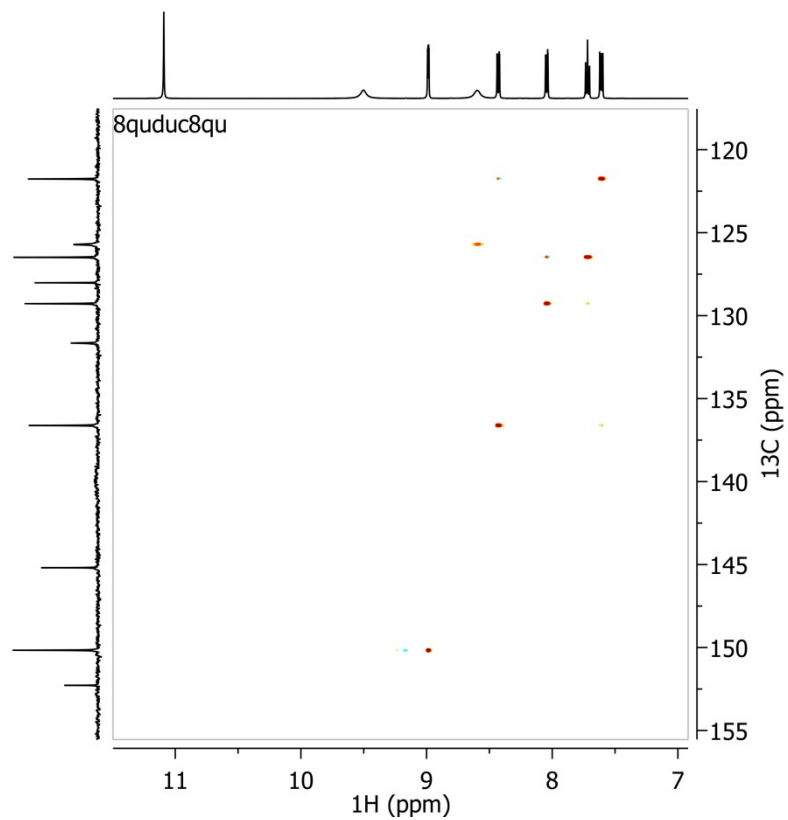

**Figure S 18.**  $^1\text{H}$ - $^{13}\text{C}$  HSQC spectrum of **O2**.

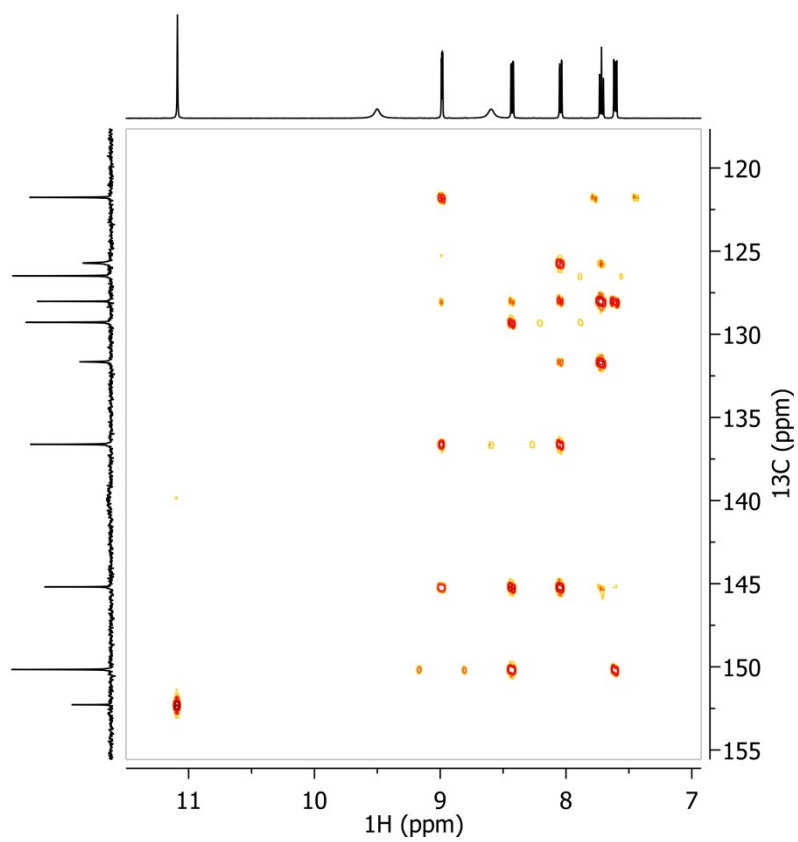

**Figure S 19.**  $^1\text{H}$ - $^{13}\text{C}$  HMBC spectrum of **O2**.

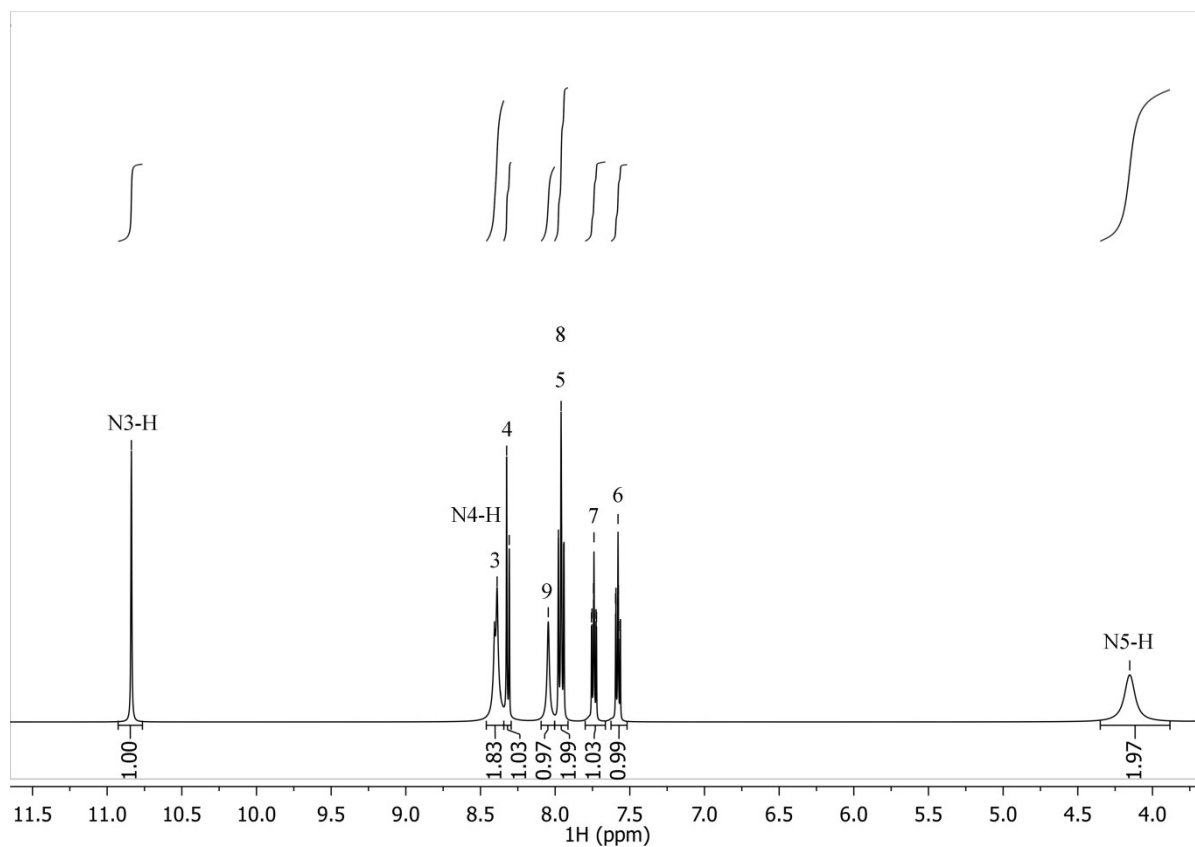

**Figure S 20.**  $^1\text{H}$  NMR spectrum of **O3** in  $\text{DMSO-}d_6$ .

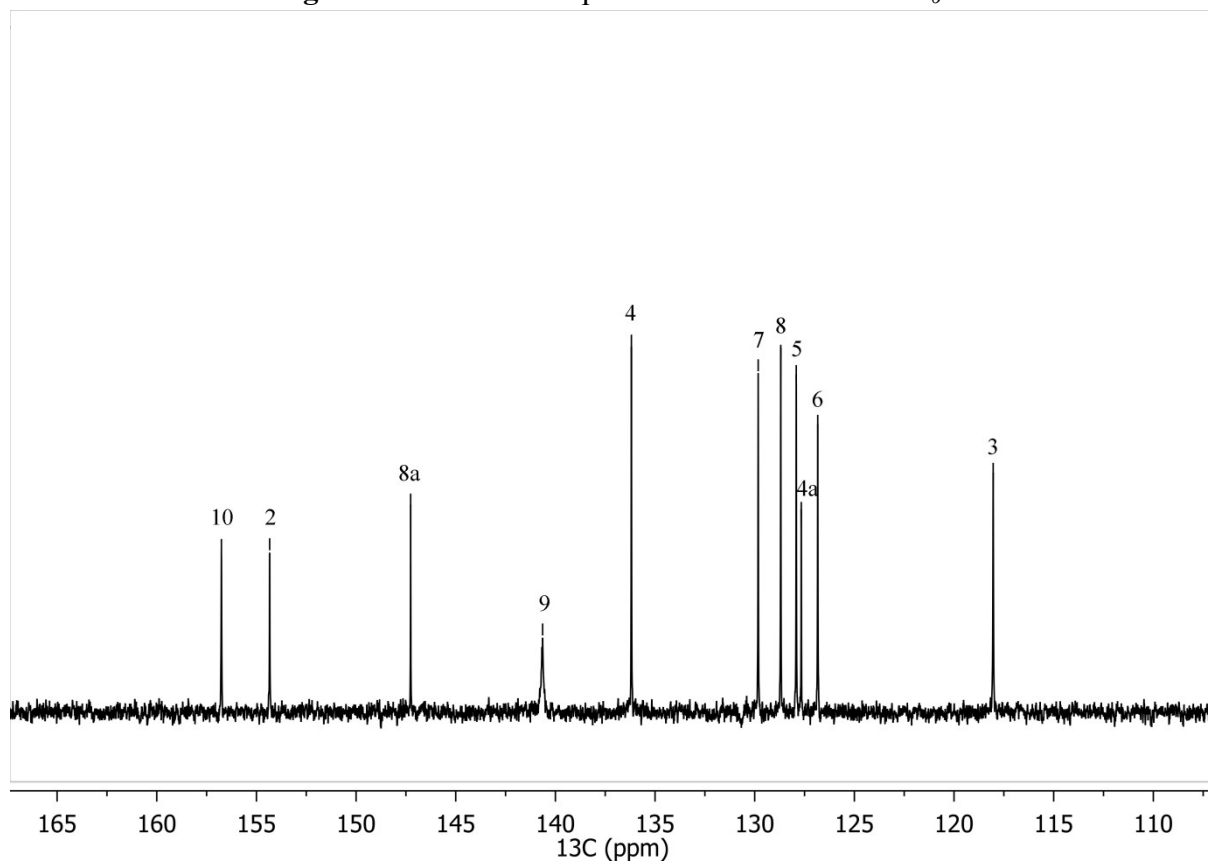

**Figure S 21.**  $^{13}\text{C}$  NMR spectrum of **O3** in  $\text{DMSO-}d_6$ .

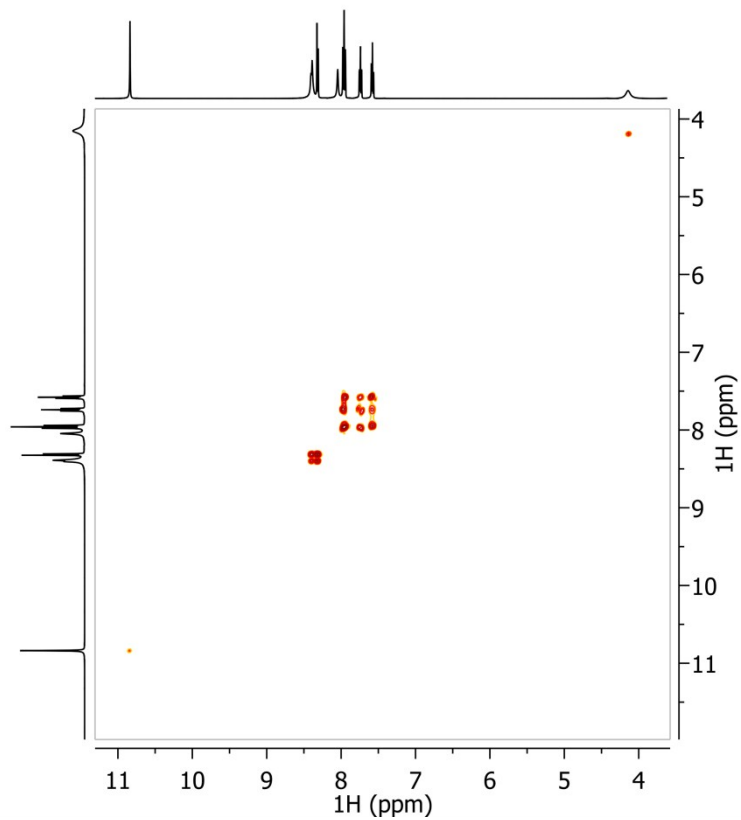

**Figure S 22.** COSY spectrum of **O3**.

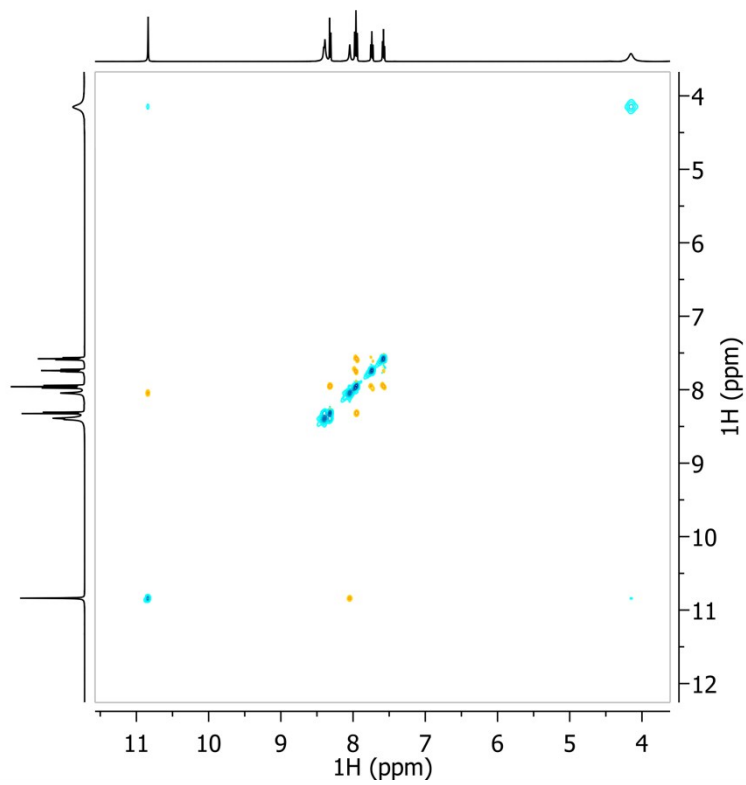

**Figure S 23.** NOESY spectrum of **O3**.

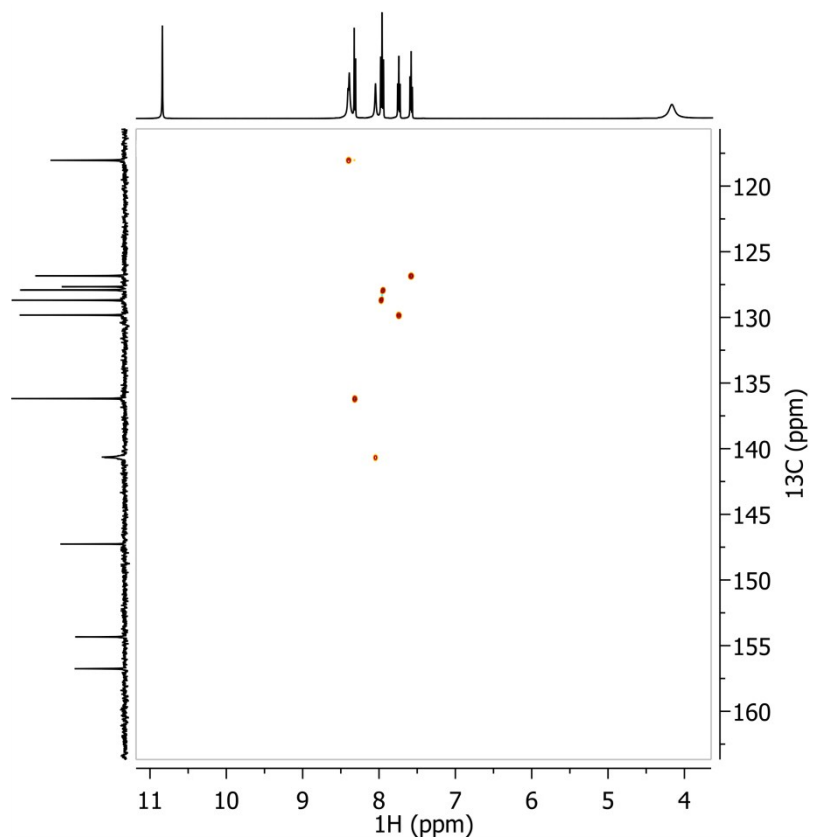

**Figure S 24.**  $^1\text{H}$ - $^{13}\text{C}$  HSQC spectrum of O3.

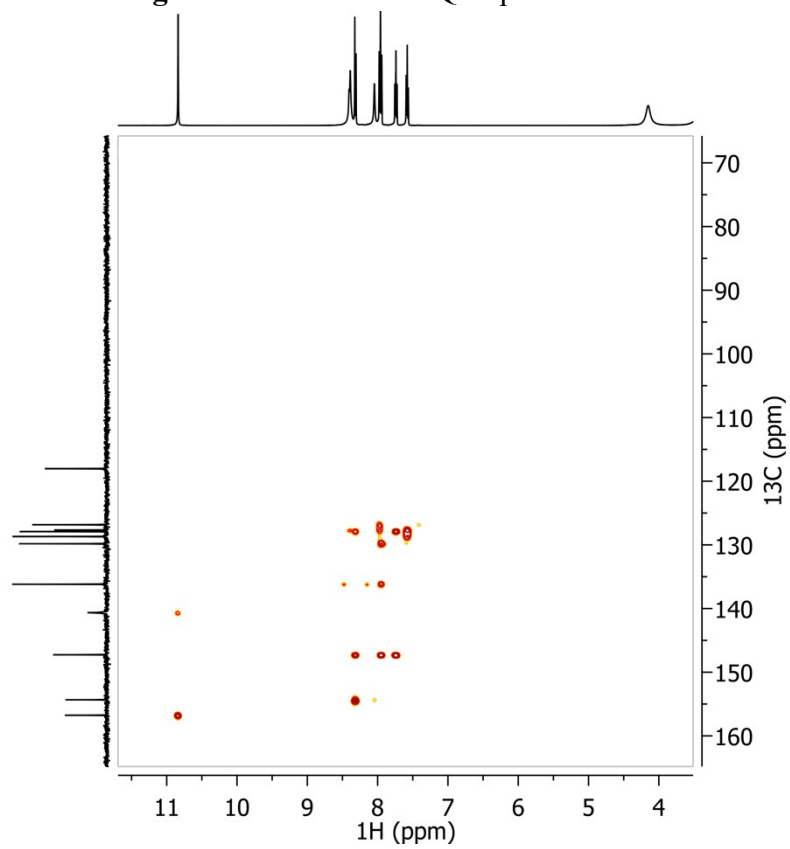

**Figure S 25.**  $^1\text{H}$ - $^{13}\text{C}$  HMBC spectrum of O3.

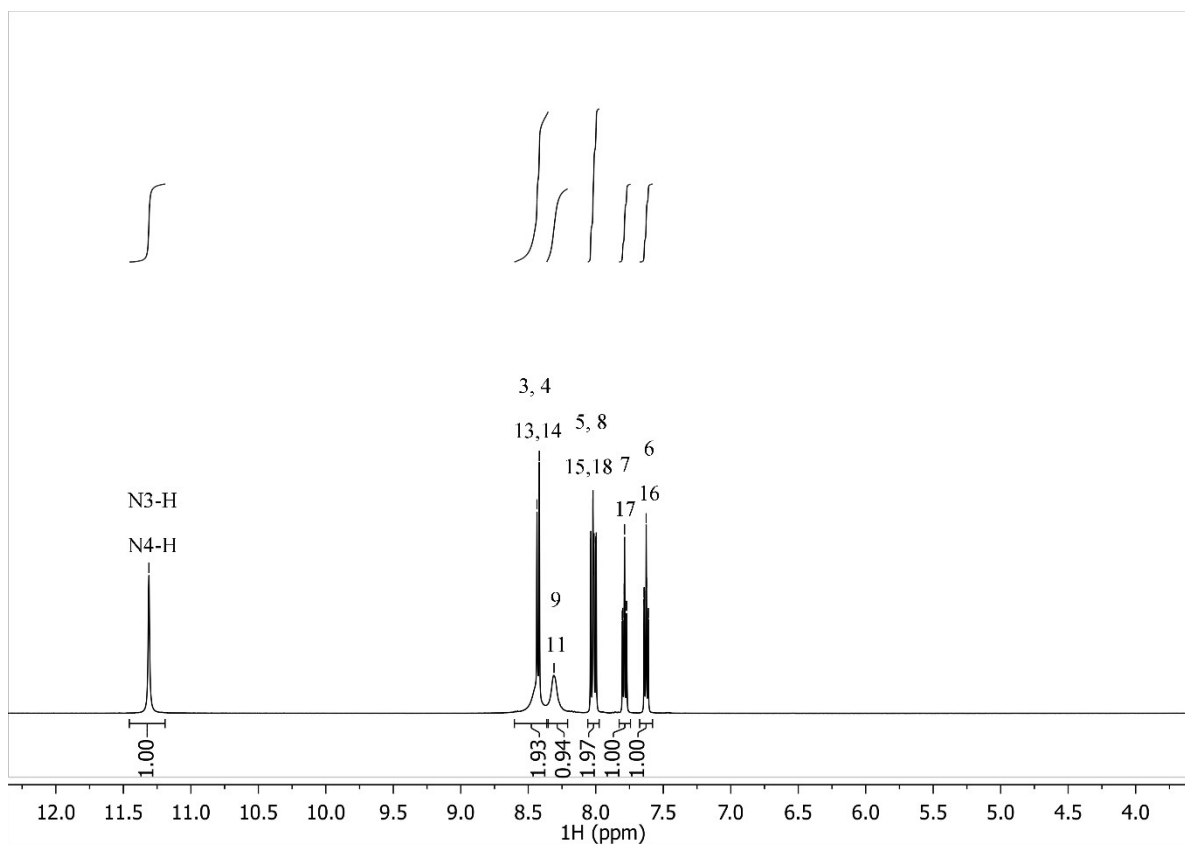

**Figure S 26.**  $^1\text{H}$  NMR spectrum of **O4** in  $\text{DMSO-}d_6$ .

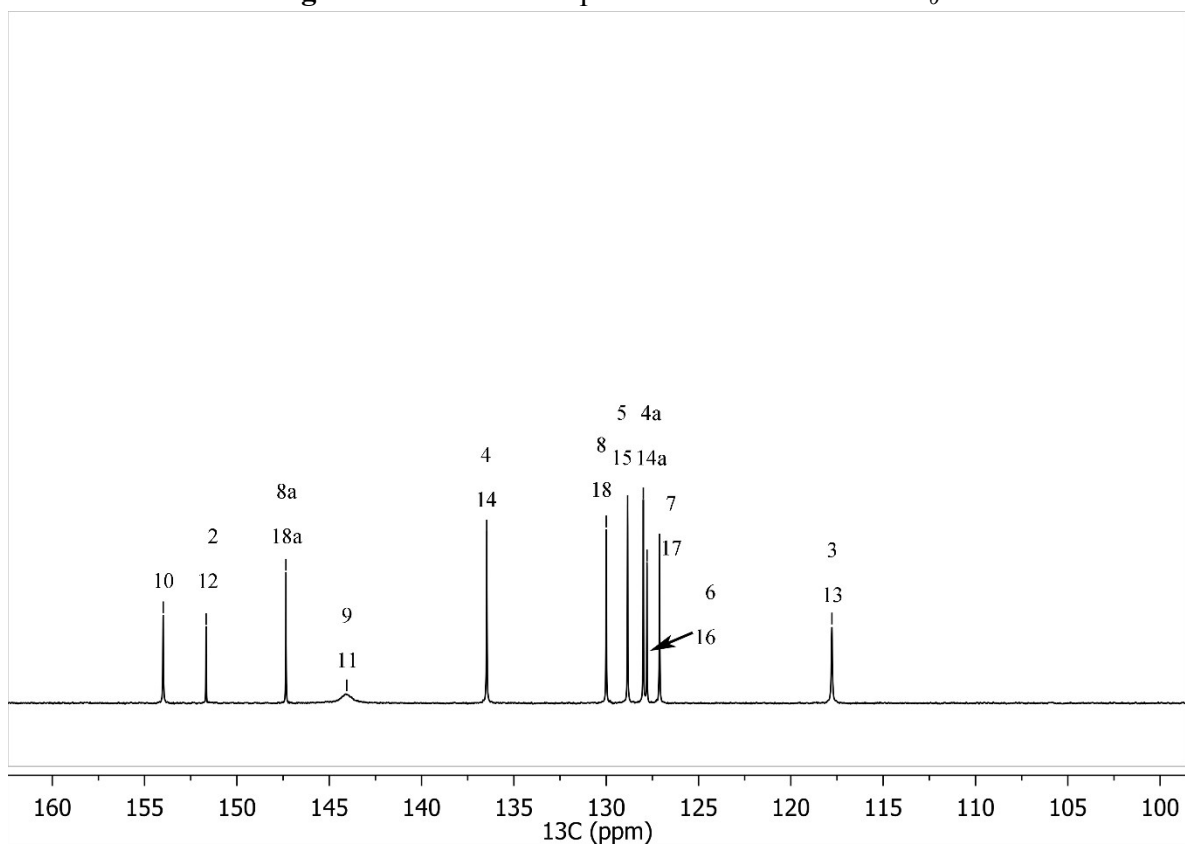

**Figure S 27.**  $^{13}\text{C}$  NMR spectrum of **O4** in  $\text{DMSO-}d_6$ .

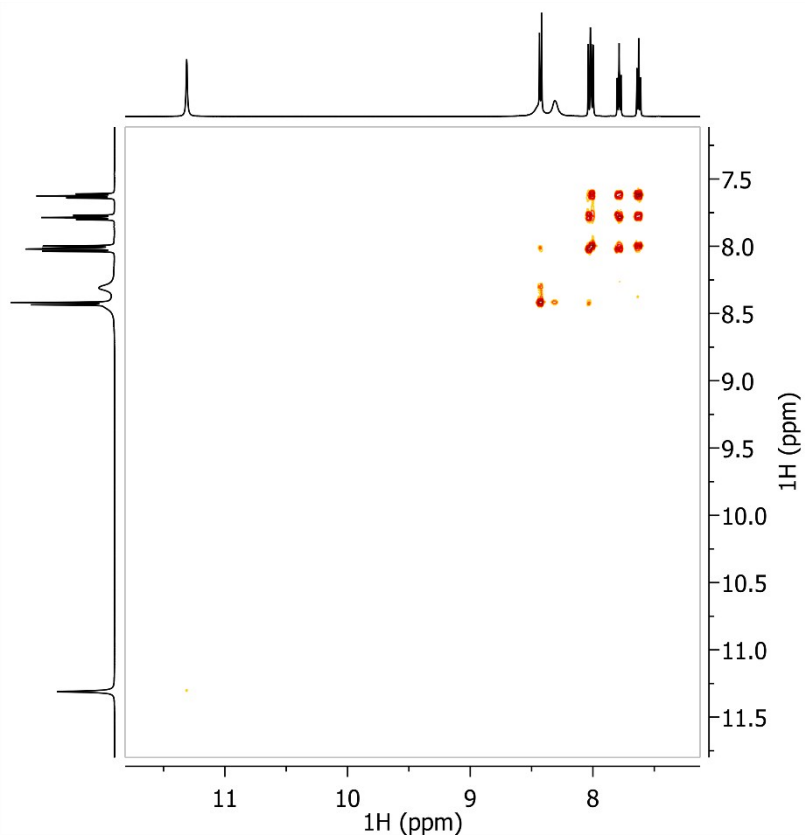

**Figure S 28.** COSY spectrum of **O4**.

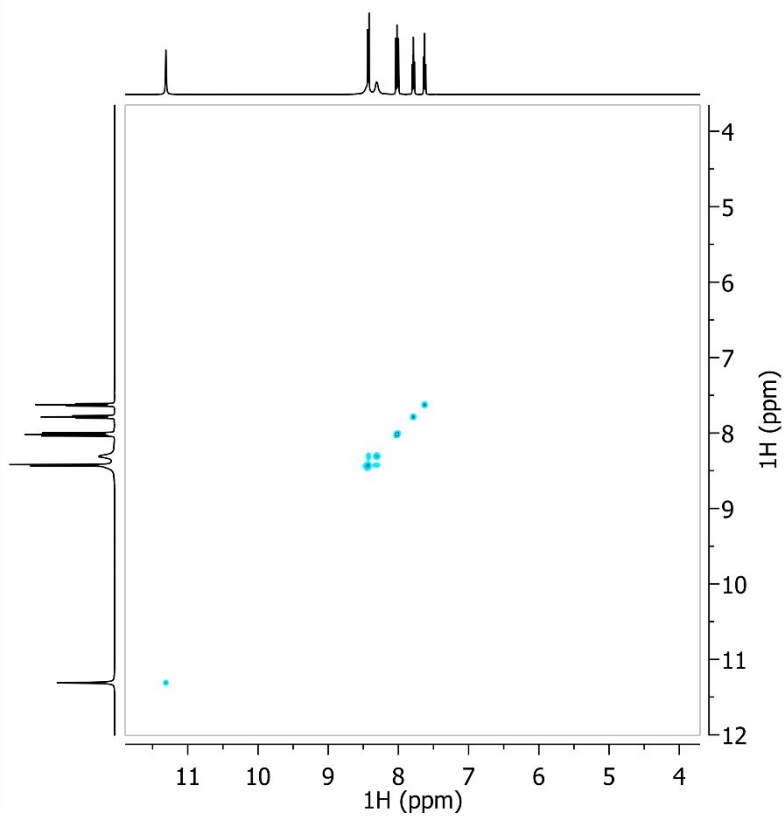

**Figure S 29.** NOESY spectrum of **O4**.

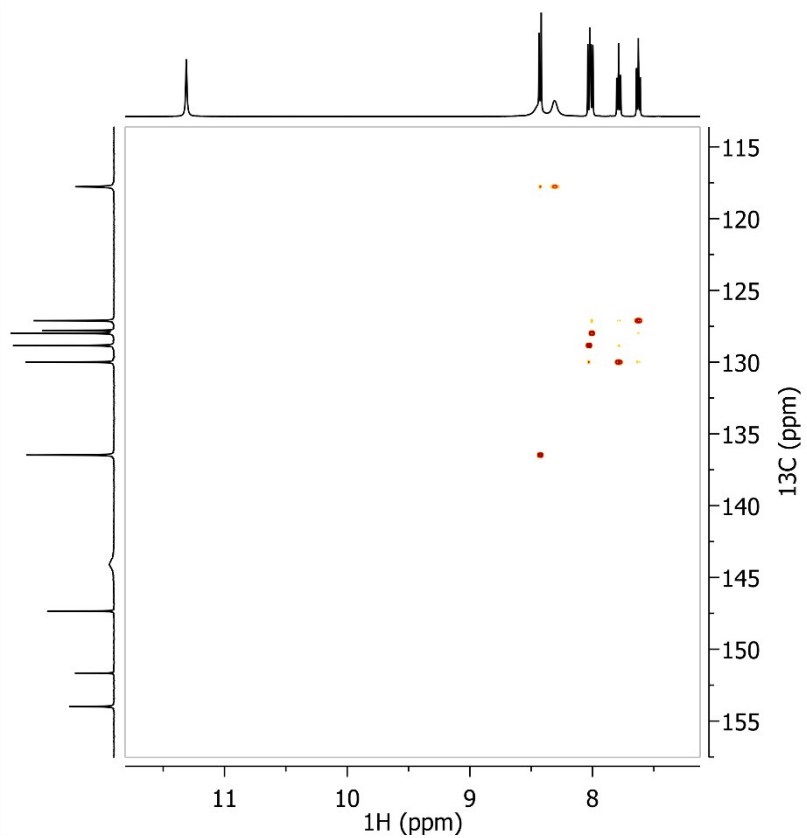

**Figure S 30.**  $^1\text{H}$ - $^{13}\text{C}$  HSQC spectrum of **O4**.

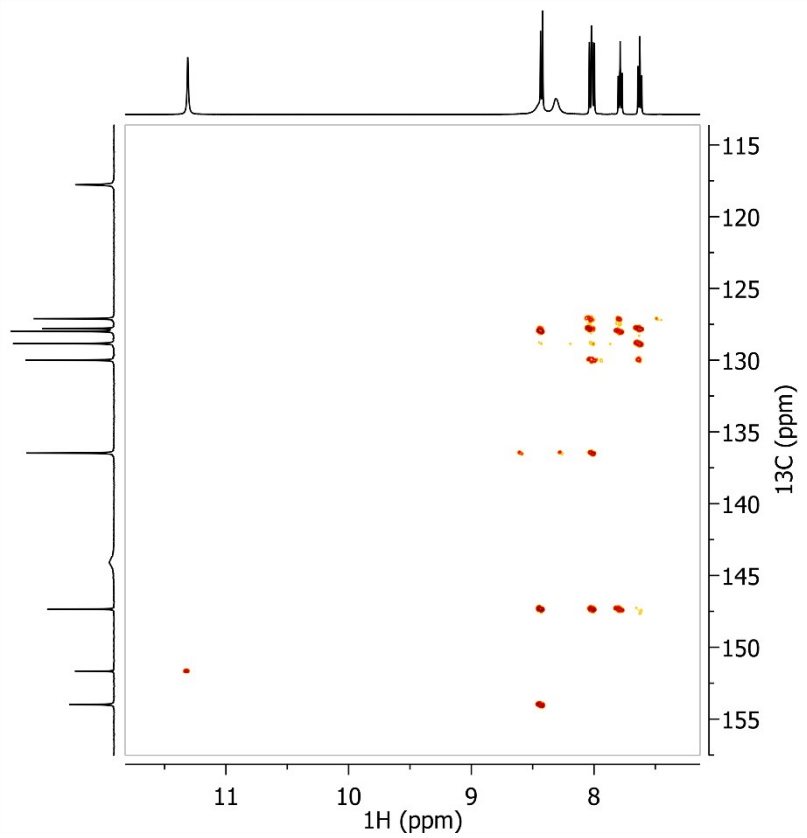

**Figure S 31.**  $^1\text{H}$ - $^{13}\text{C}$  HMBC spectrum of **O4**.

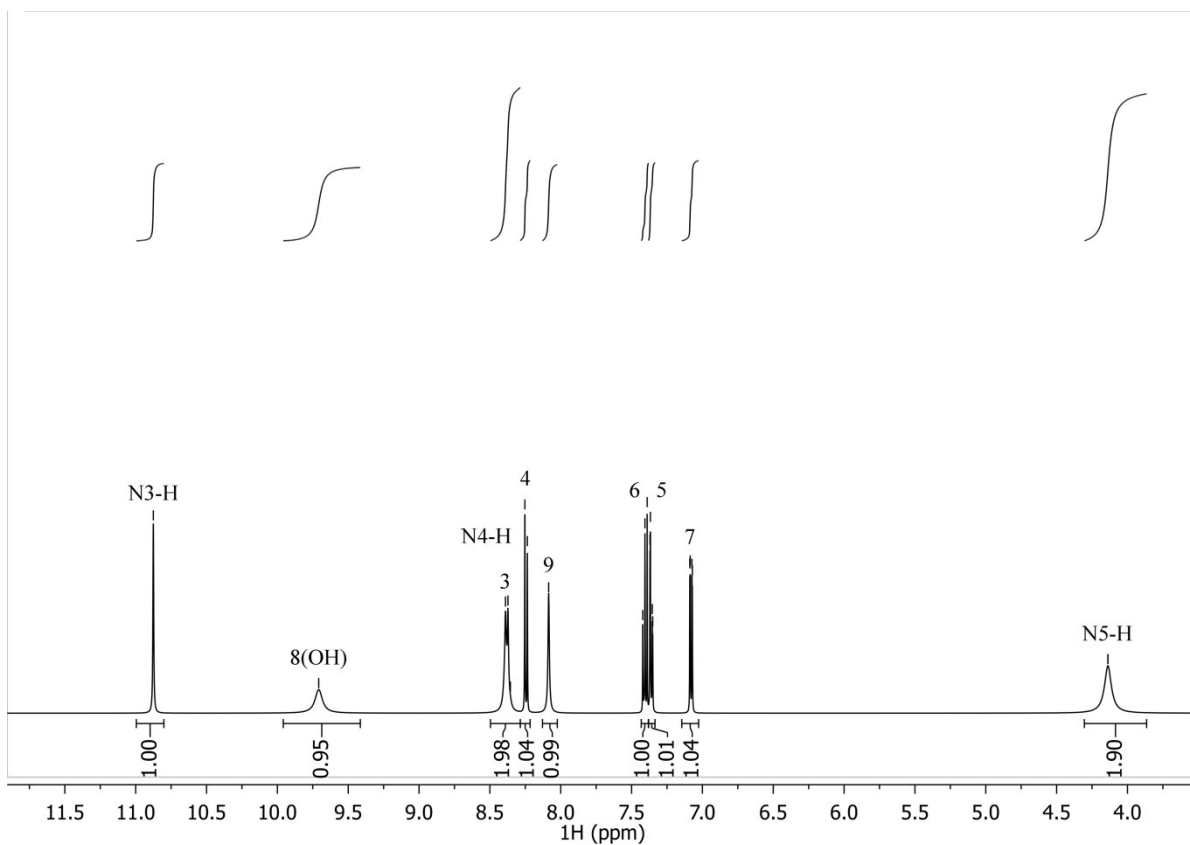

**Figure S 32.**  $^1\text{H}$  NMR spectrum of **O5** in  $\text{DMSO-}d_6$ .

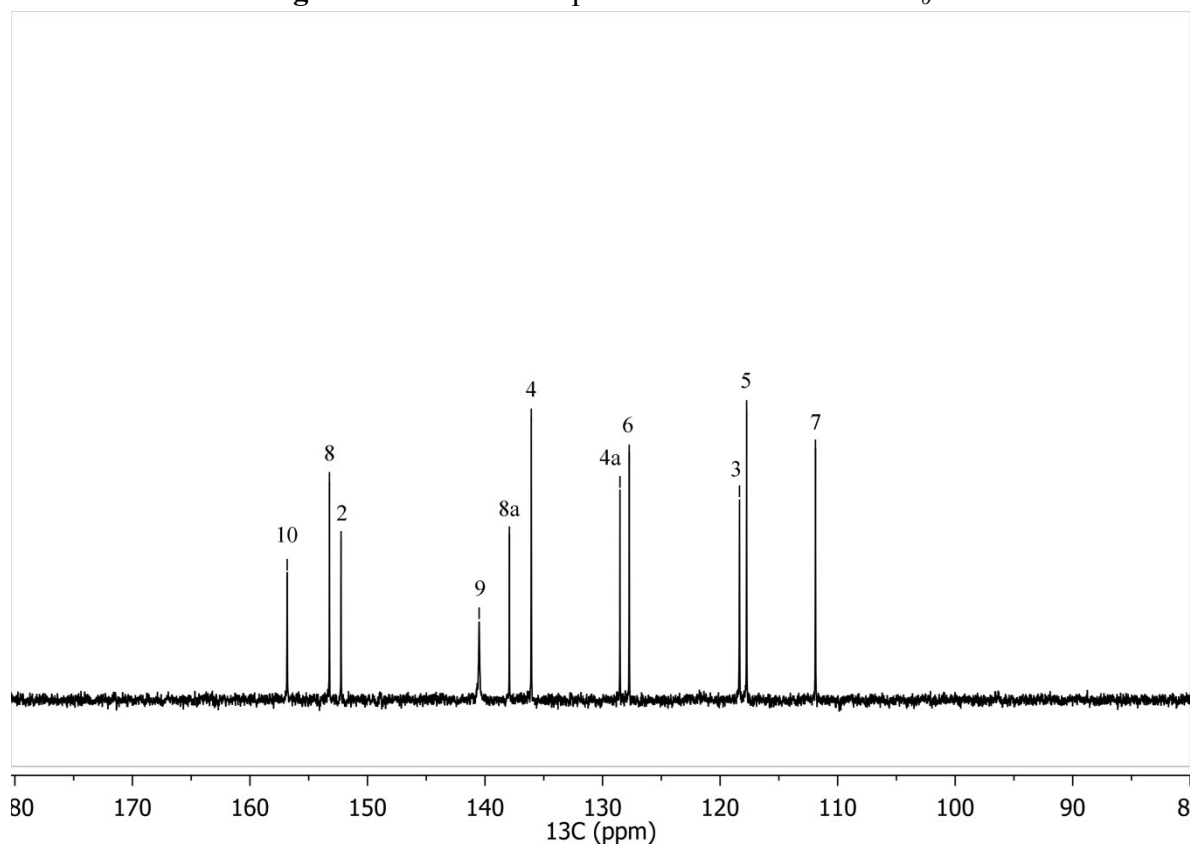

**Figure S 33.**  $^{13}\text{C}$  NMR spectrum of **O5** in  $\text{DMSO-}d_6$ .



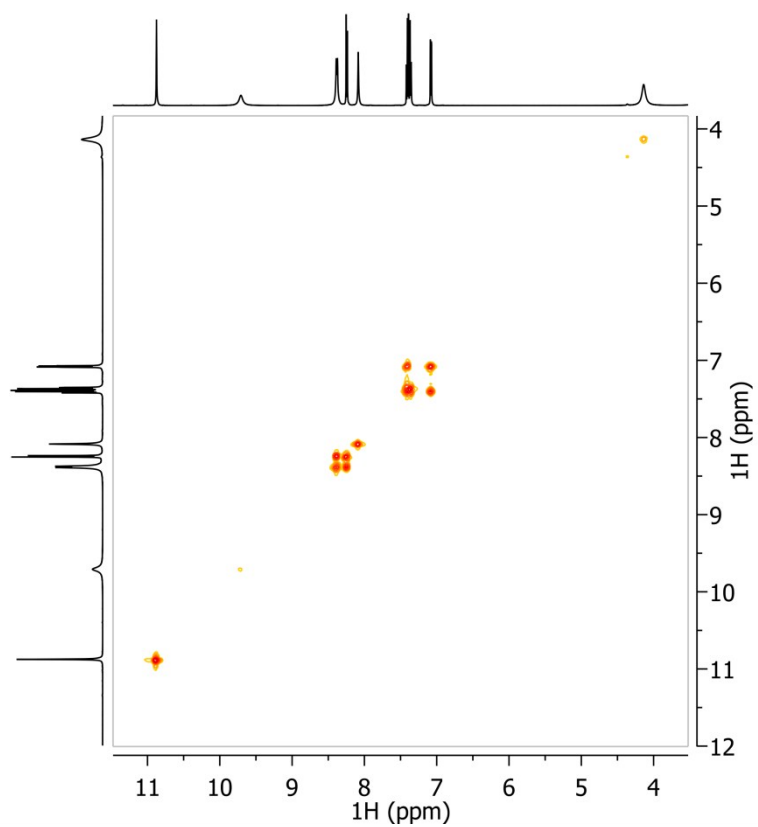

**Figure S 34.** COSY spectrum of **O5**.

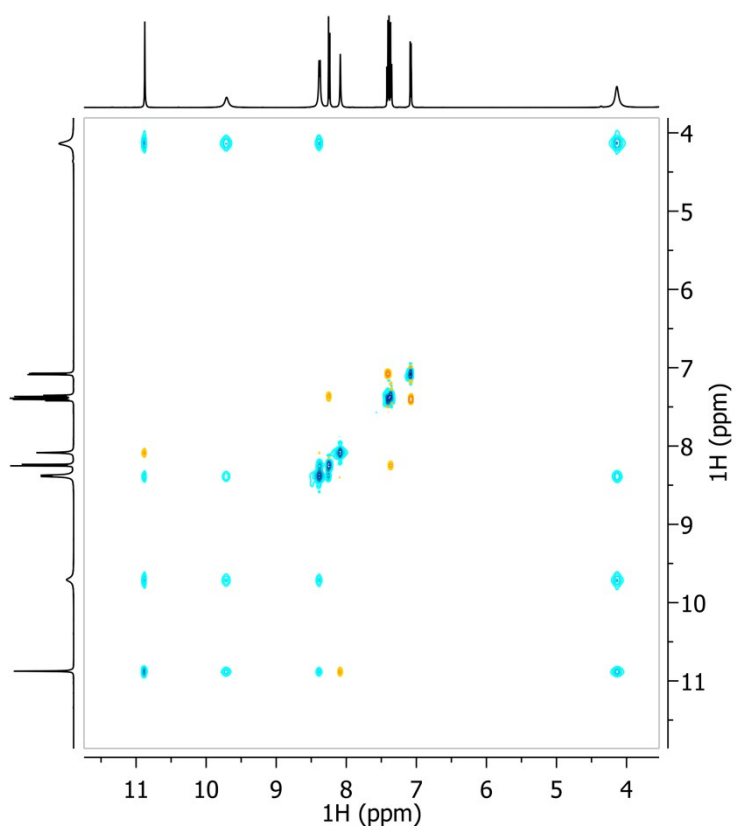

**Figure S 35.** NOESY spectrum of **O5**.

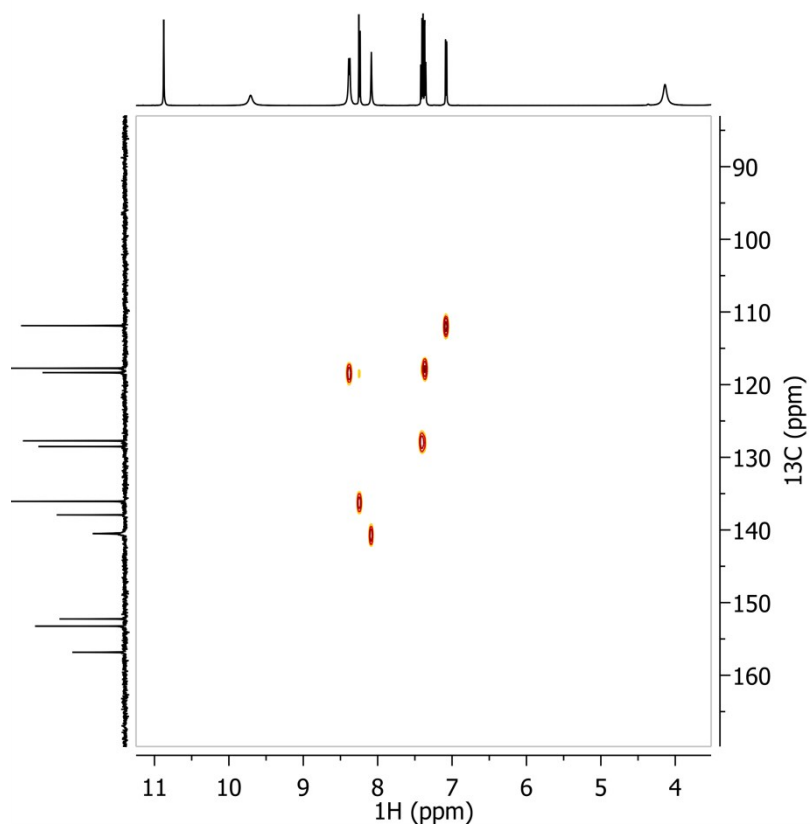

**Figure S 36.**  $^1\text{H}$ - $^{13}\text{C}$  HSQC spectrum of **O5**.

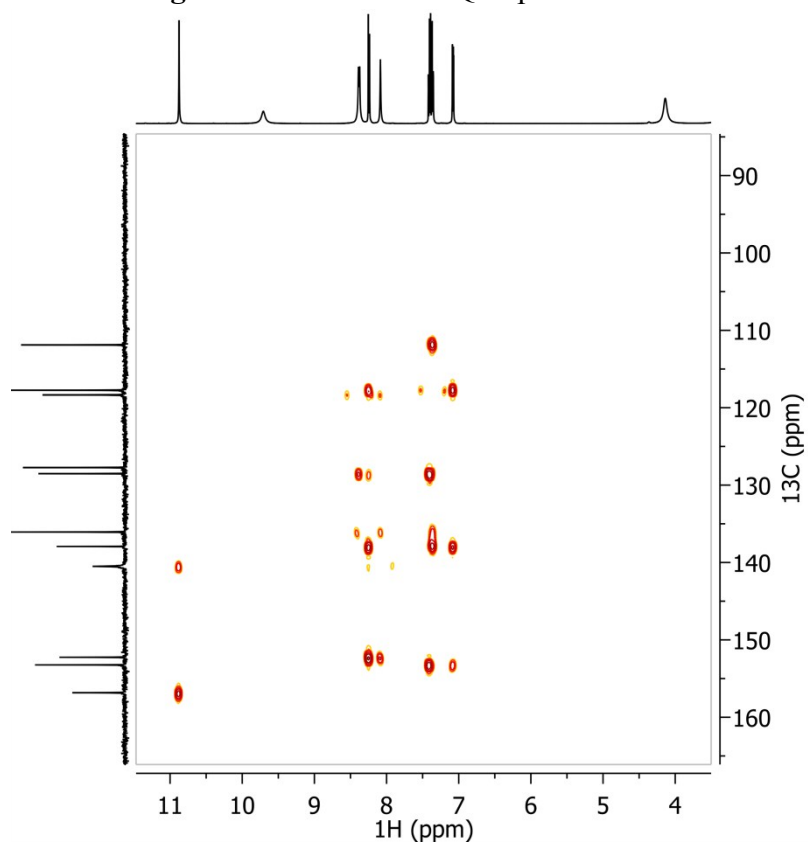

**Figure S 37.**  $^1\text{H}$ - $^{13}\text{C}$  HMBC spectrum of **O5**.

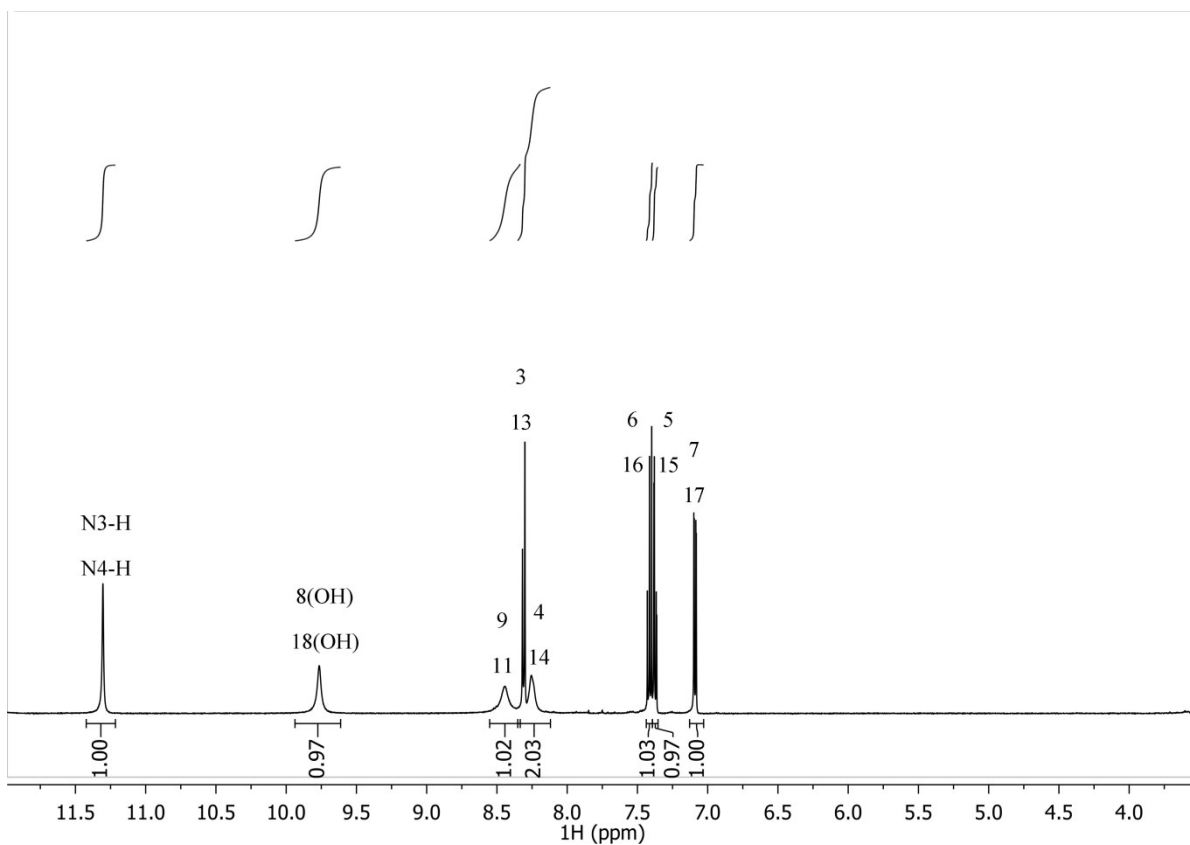

Figure S 38.  $^1\text{H}$  NMR spectrum of O6 in  $\text{DMSO-}d_6$ .

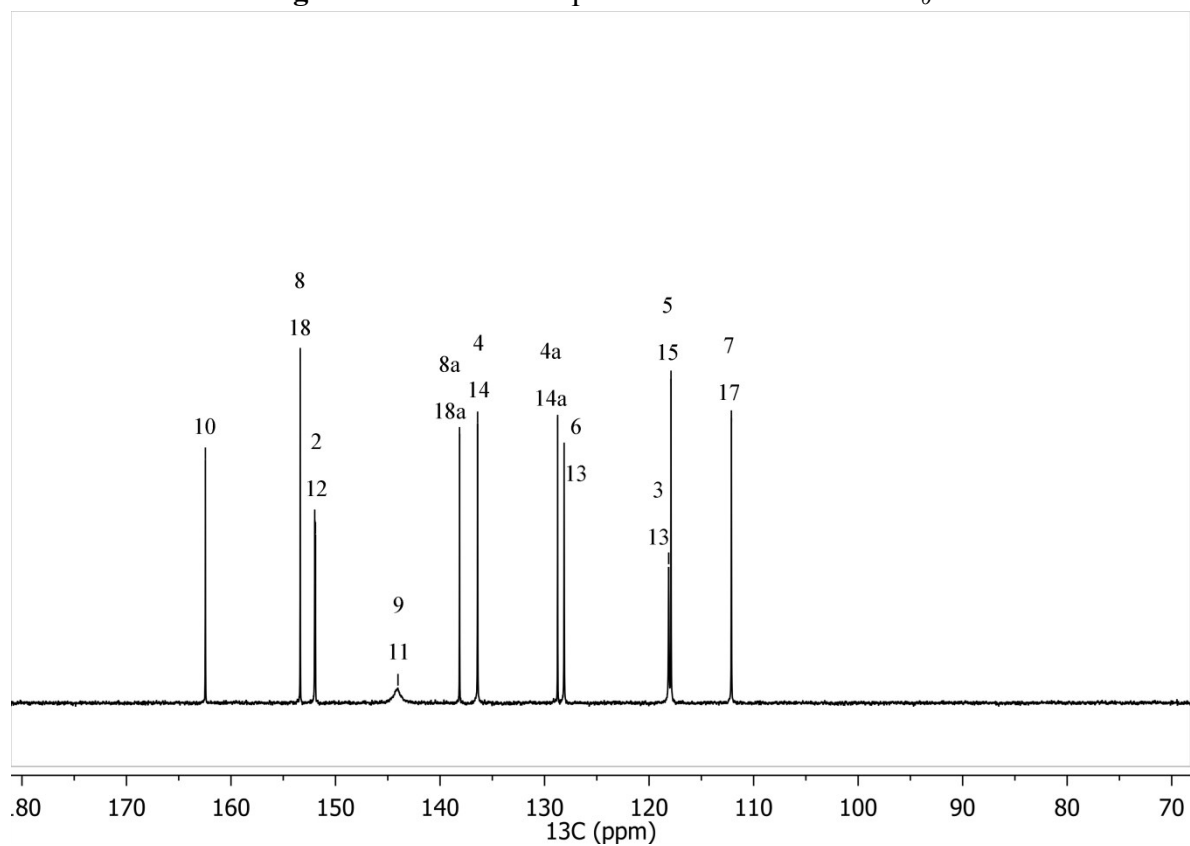

Figure S 39.  $^{13}\text{C}$  NMR spectrum of O6 in  $\text{DMSO-}d_6$ .

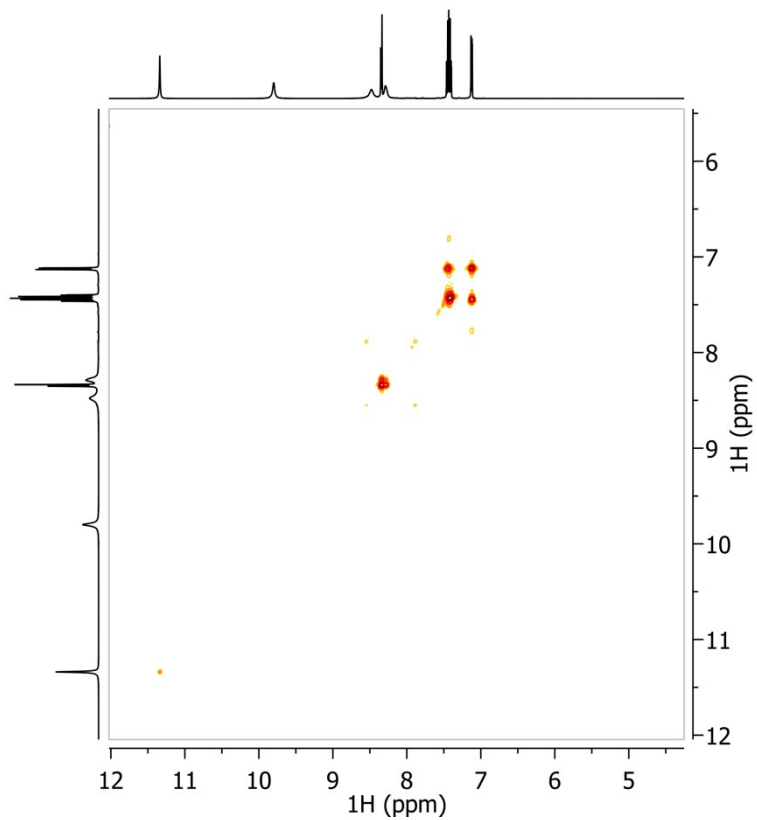

**Figure S 40.** COSY spectrum of **O6**.

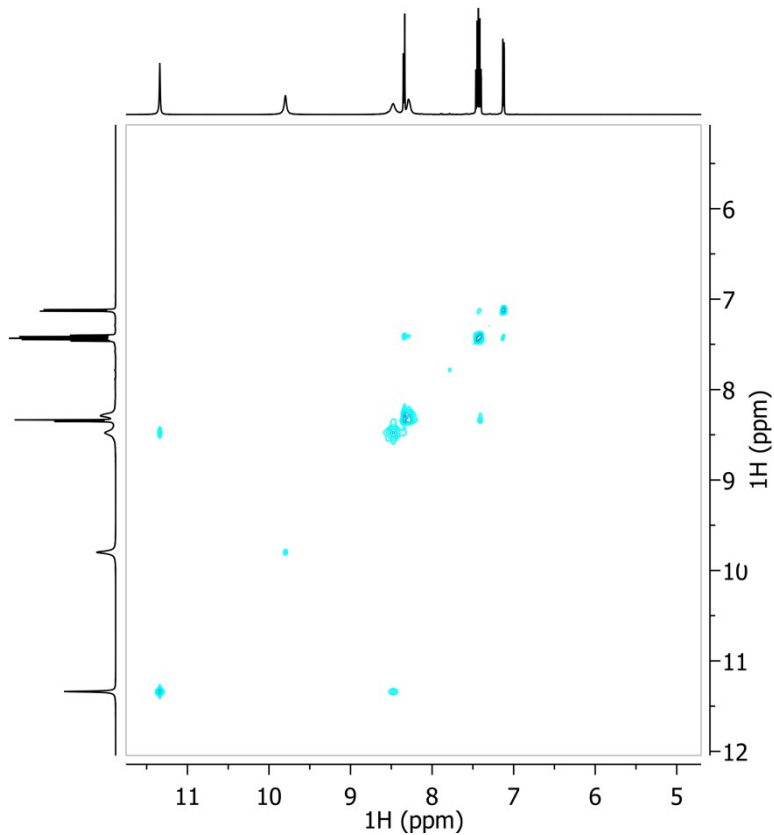

**Figure S 41.** NOESY spectrum of **O6**.

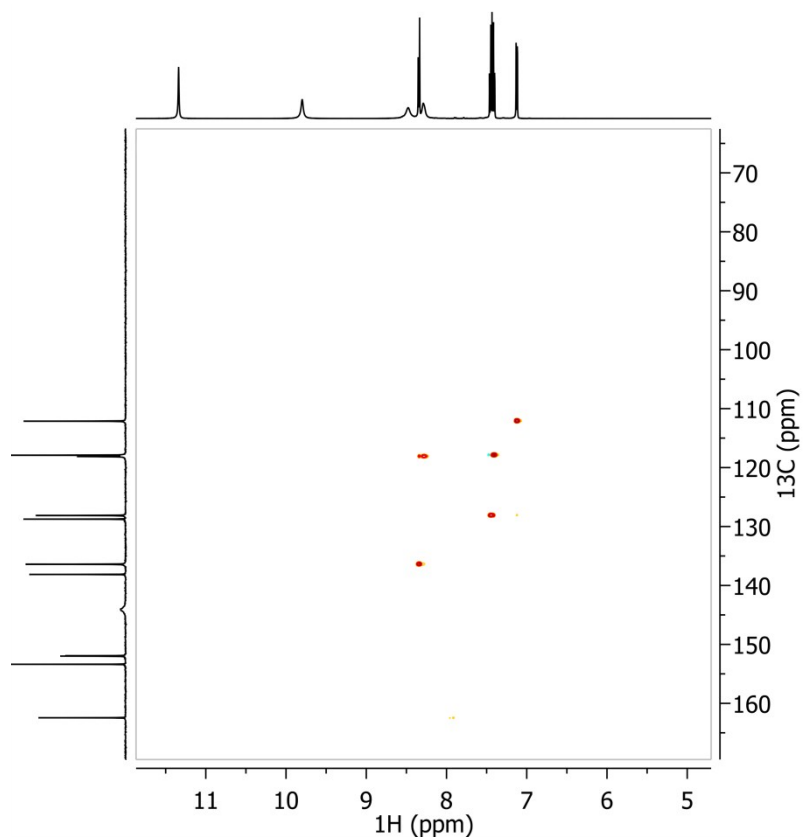

**Figure S 42.**  $^1\text{H}$ - $^{13}\text{C}$  HSQC spectrum of **O6**.

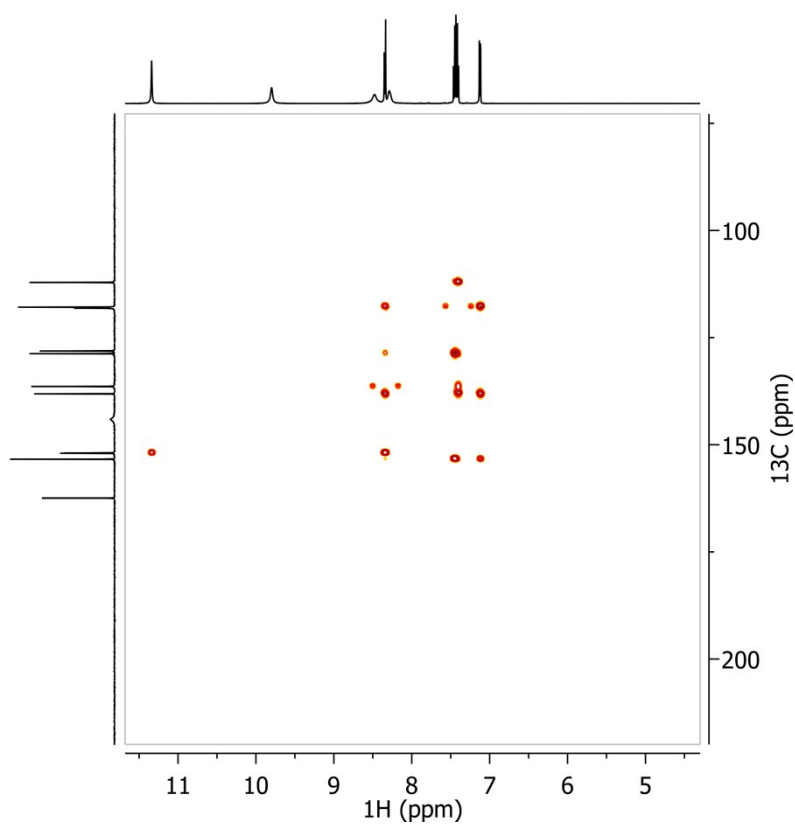

**Figure S 43.**  $^1\text{H}$ - $^{13}\text{C}$  HMBC spectrum of **O6**.

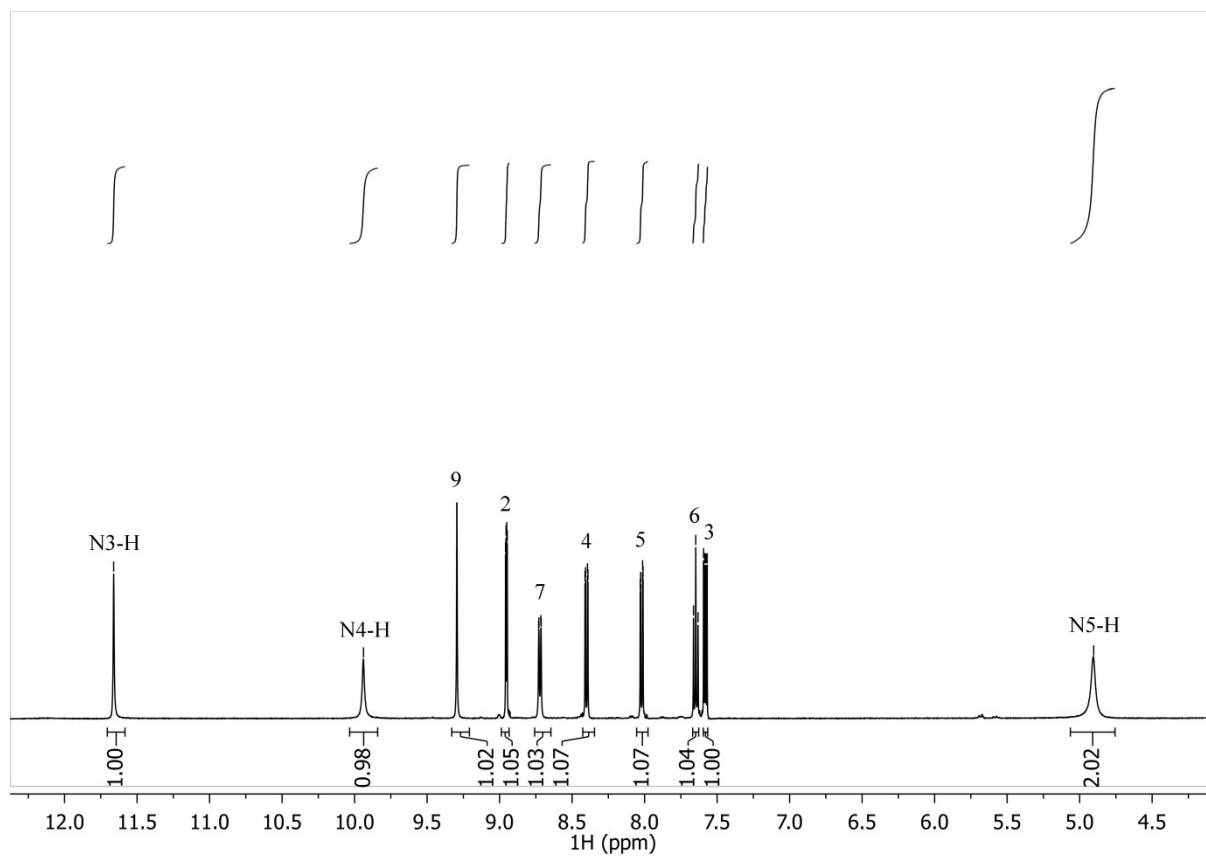

Figure S 44.  $^1\text{H}$  NMR spectrum of S1 in  $\text{DMSO-}d_6$ .

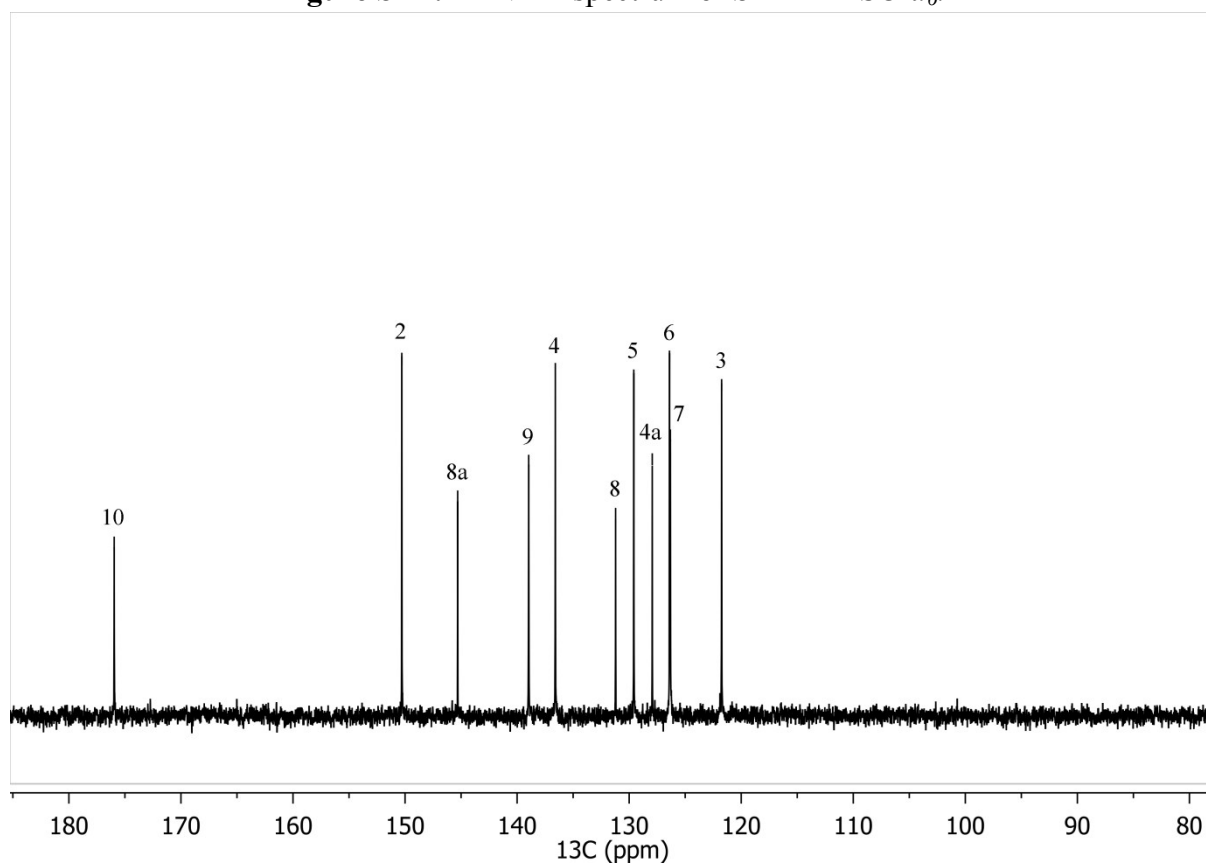

Figure S 45.  $^{13}\text{C}$  NMR spectrum of S1 in  $\text{DMSO-}d_6$ .



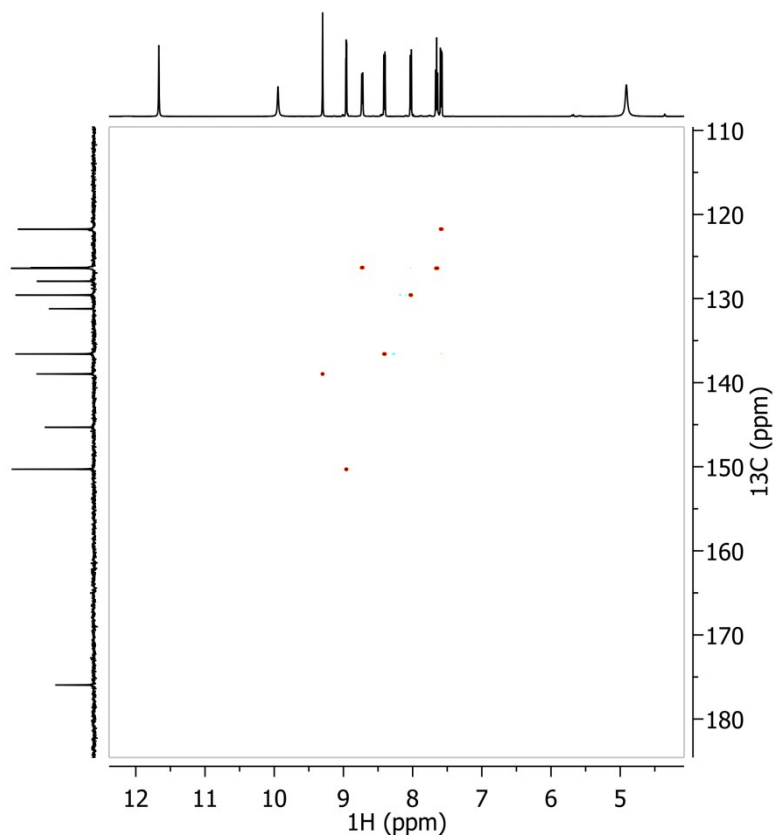

**Figure S 48.**  $^1\text{H}$ - $^{13}\text{C}$  HSQC spectrum of **S1**.

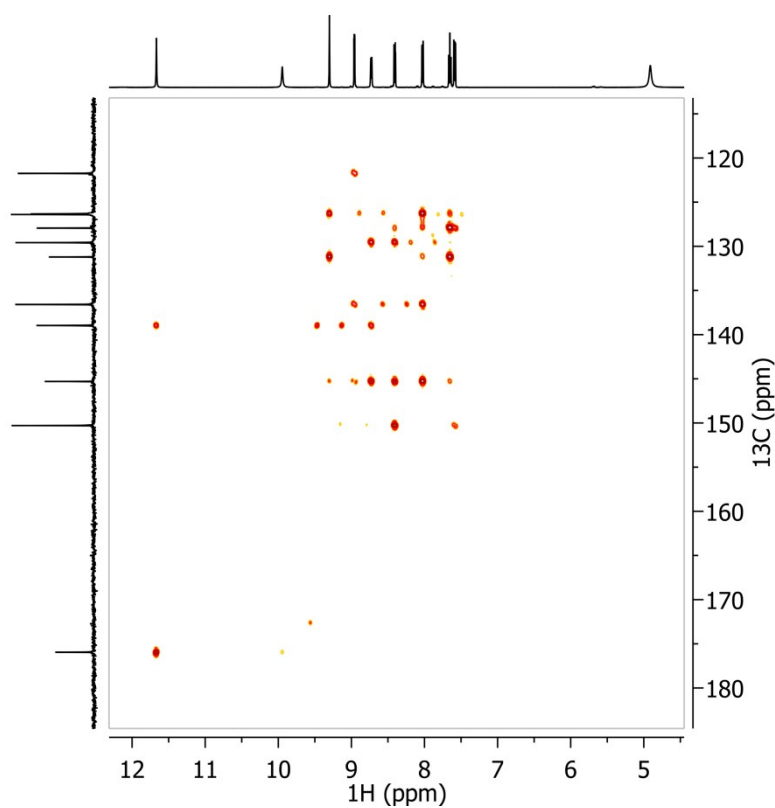

**Figure S 49.**  $^1\text{H}$ - $^{13}\text{C}$  HMBC spectrum of **S1**.



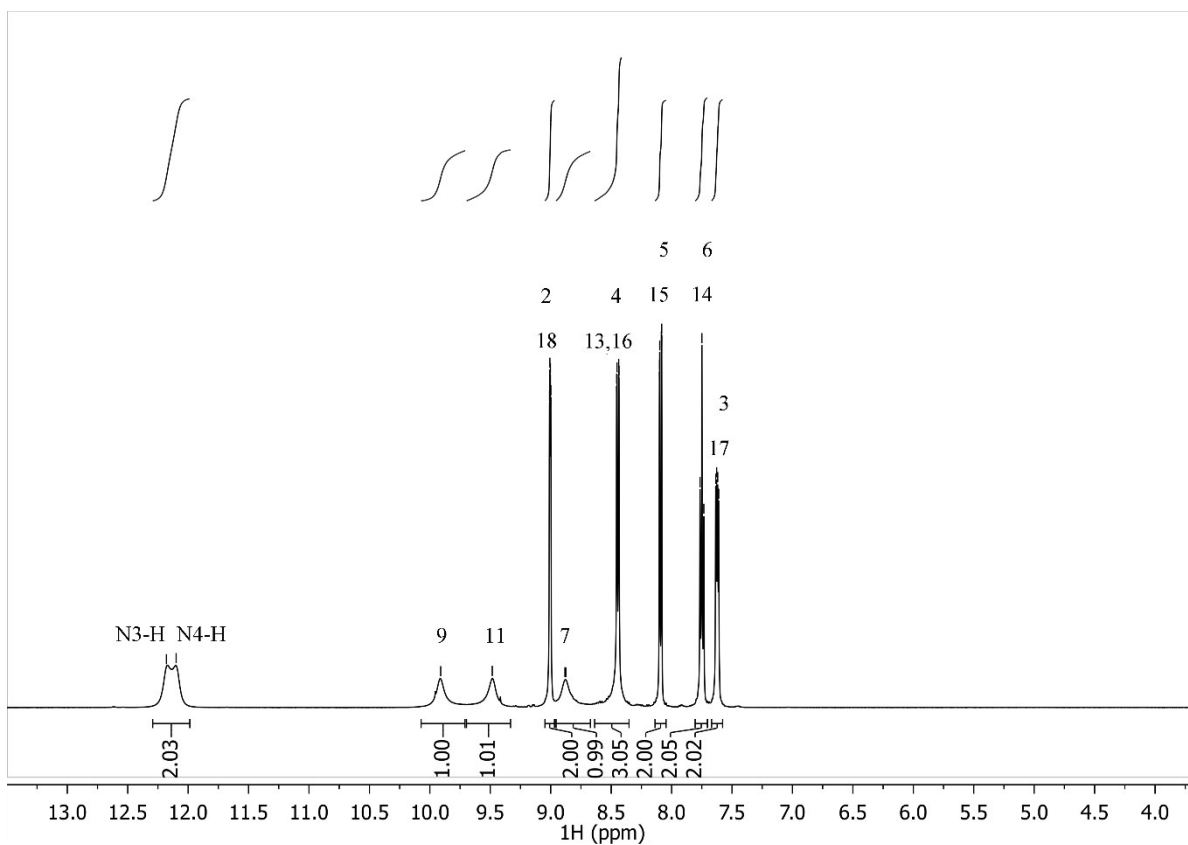

**Figure S 50.**  $^1\text{H}$  NMR spectrum of **S2** in  $\text{DMSO-}d_6$ .

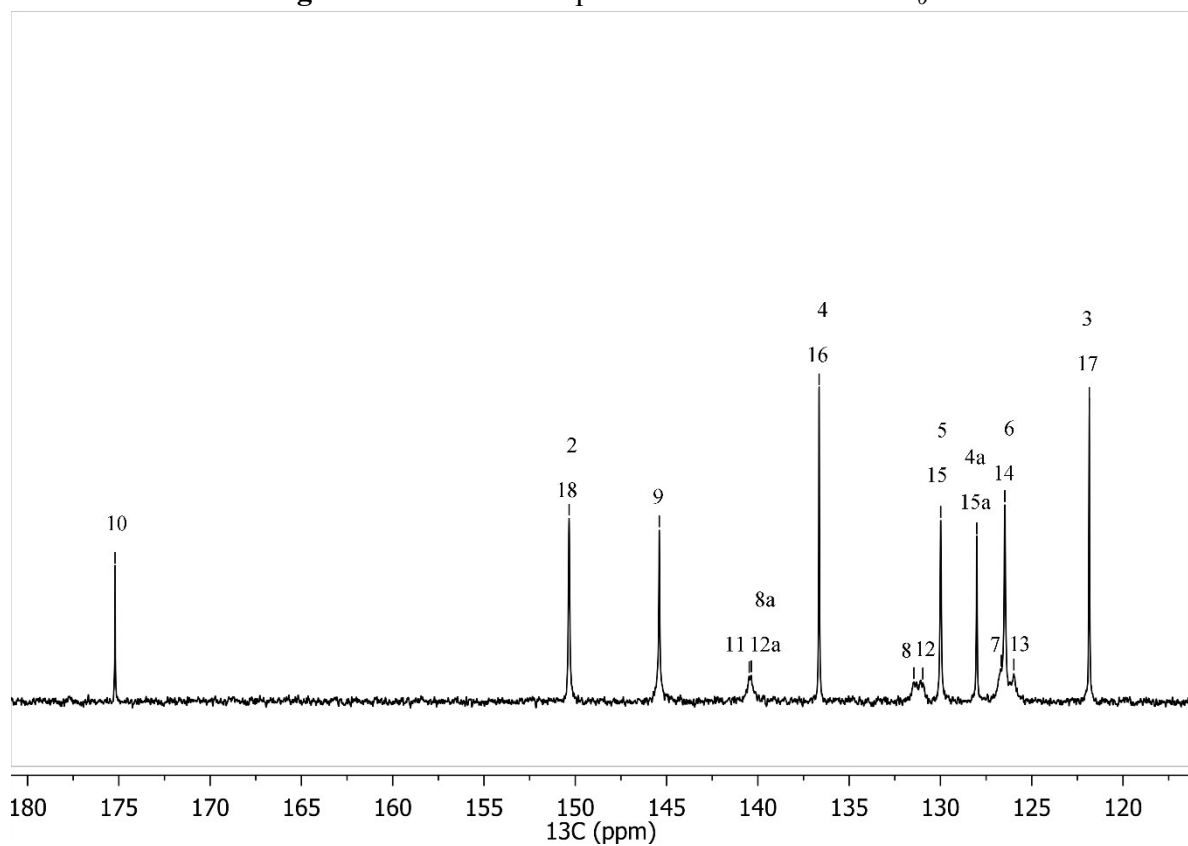

**Figure S 51.**  $^{13}\text{C}$  NMR spectrum of **S2** in  $\text{DMSO-}d_6$ .

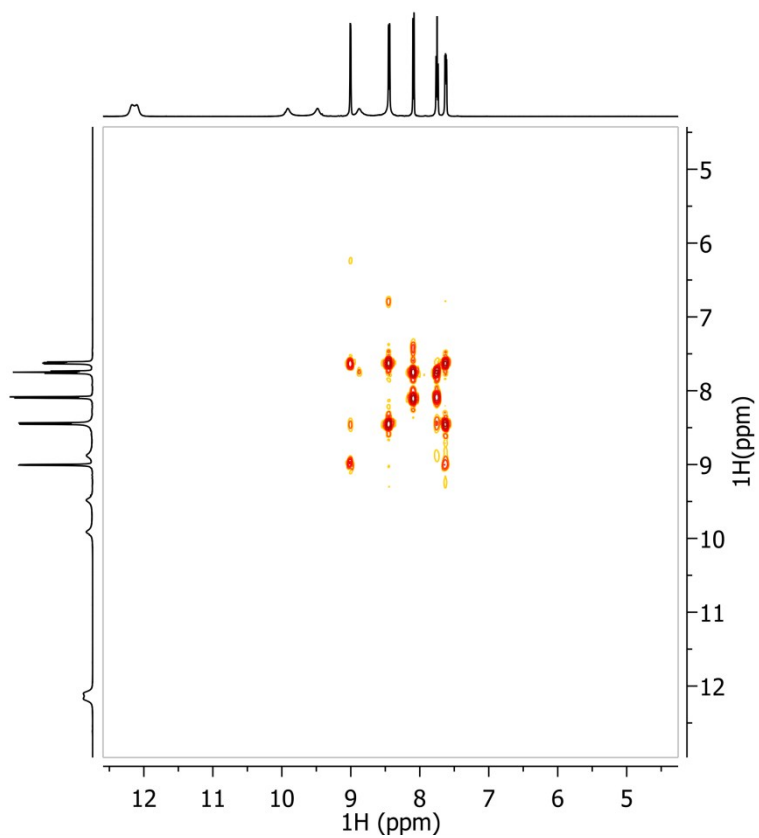

**Figure S 52.** COSY spectrum of S2.

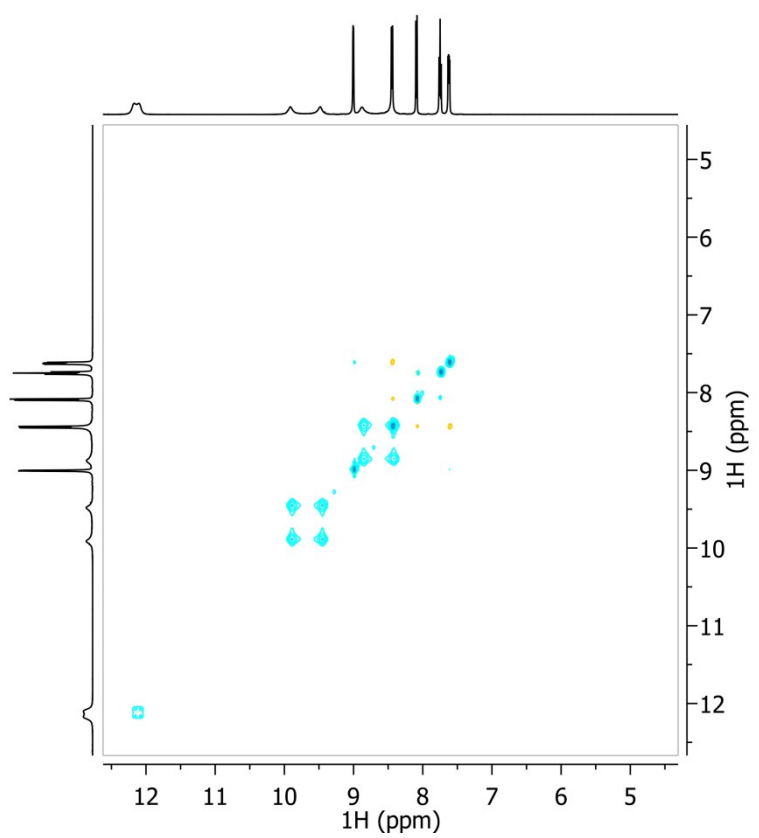

**Figure S 53.** NOESY spectrum of S2.

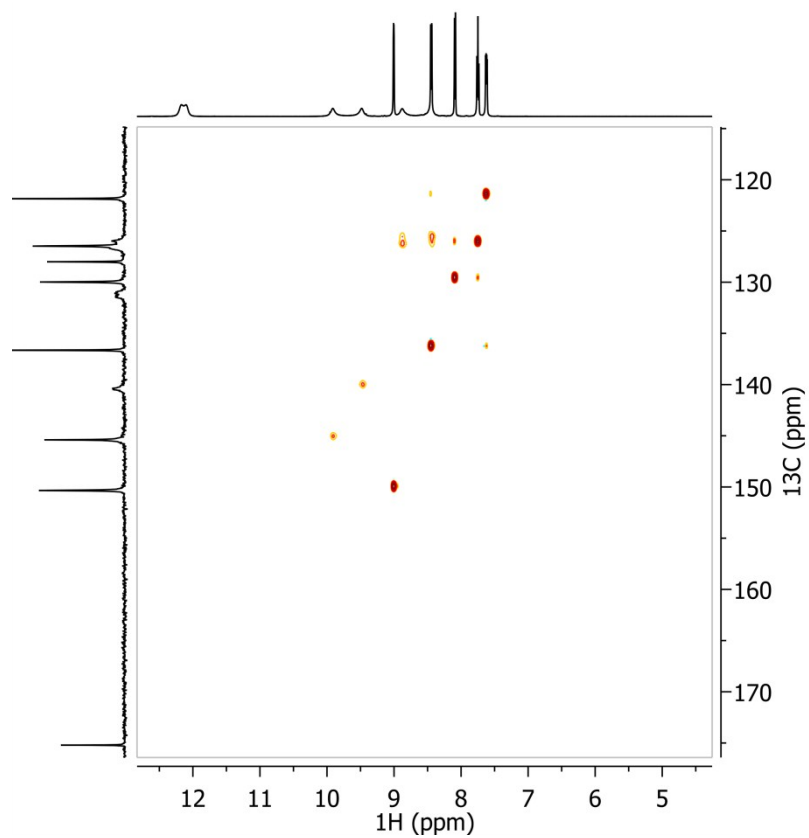

**Figure S 54.**  $^1\text{H}$ - $^{13}\text{C}$  HSQC spectrum of **S2**.

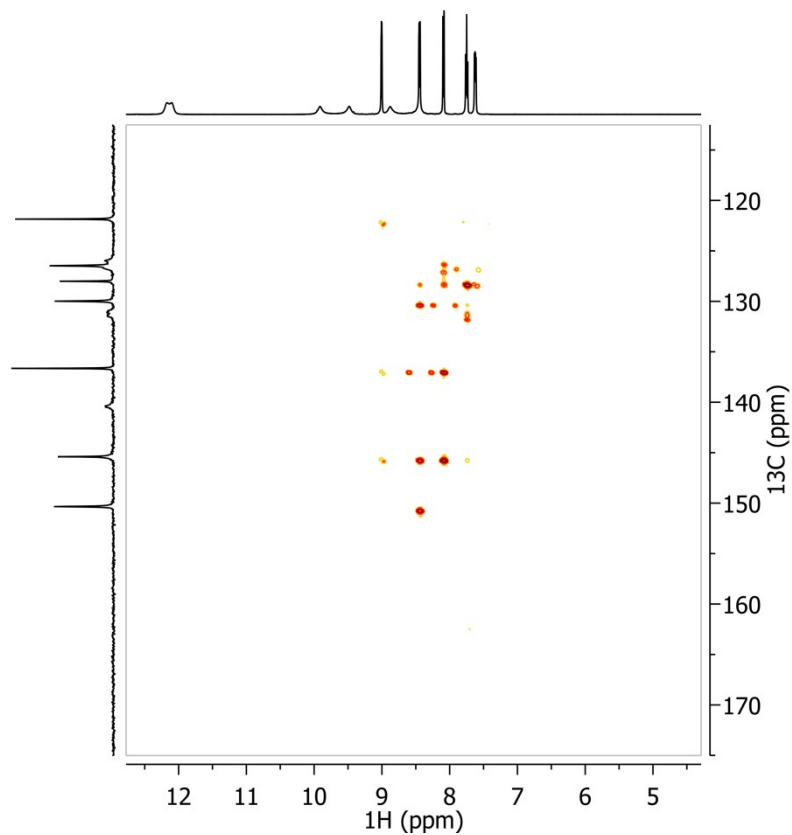

**Figure S 55.**  $^1\text{H}$ - $^{13}\text{C}$  HMBC spectrum of **S2**.

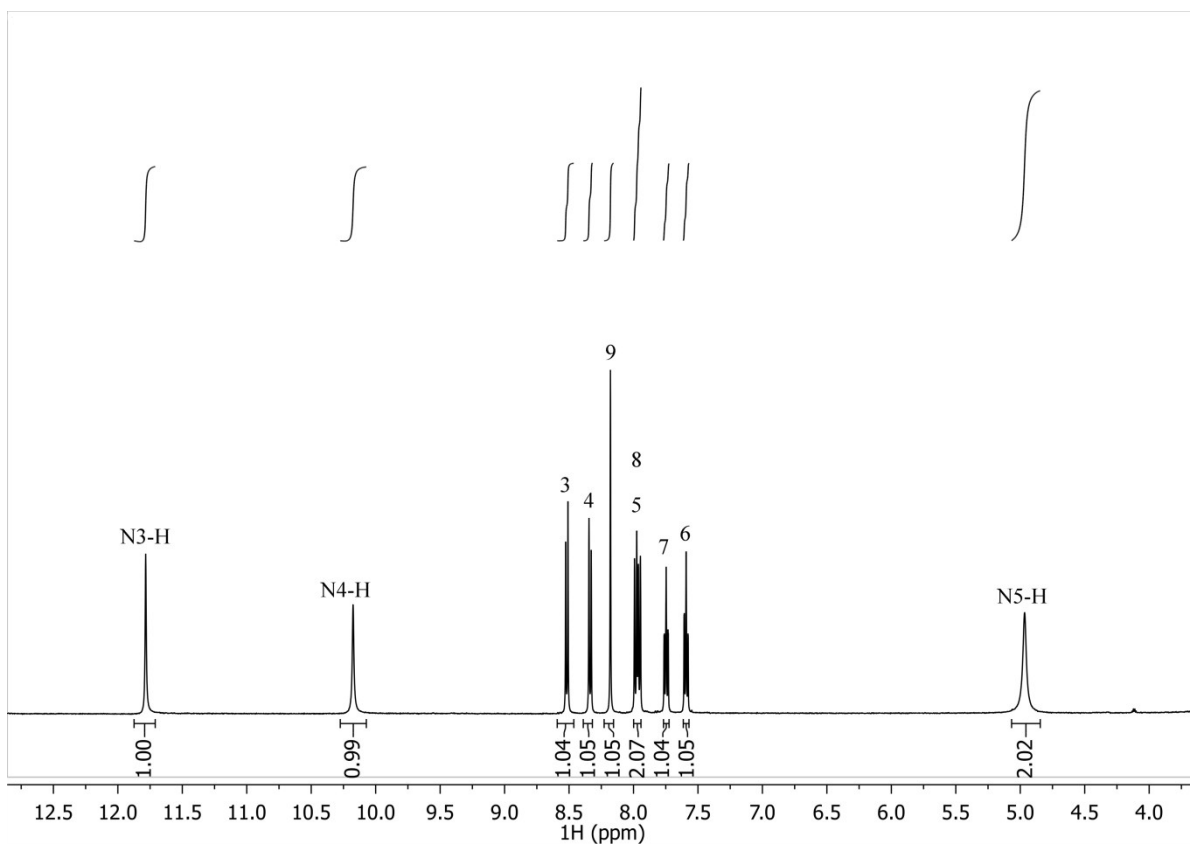

Figure S 56.  $^1\text{H}$  NMR spectrum of S3 in  $\text{DMSO-}d_6$ .

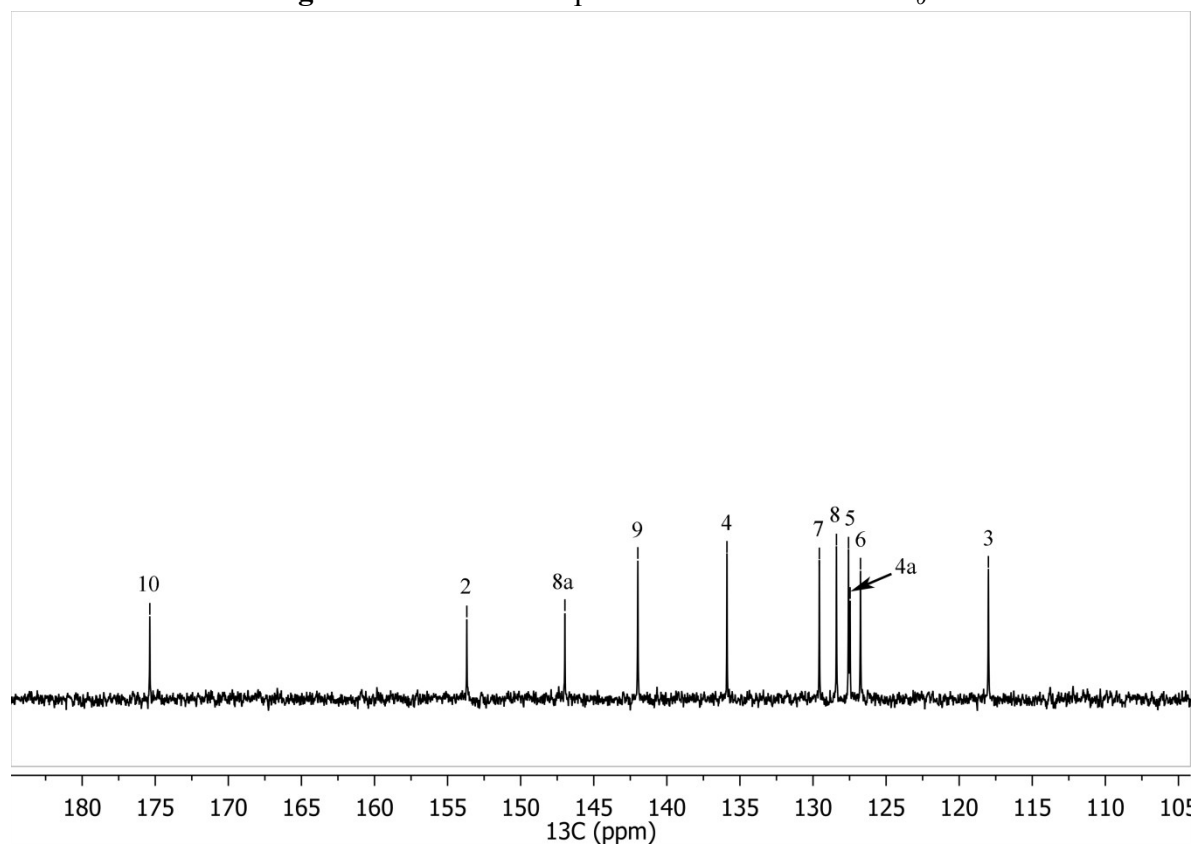

Figure S 57.  $^{13}\text{C}$  NMR spectrum of S3 in  $\text{DMSO-}d_6$ .

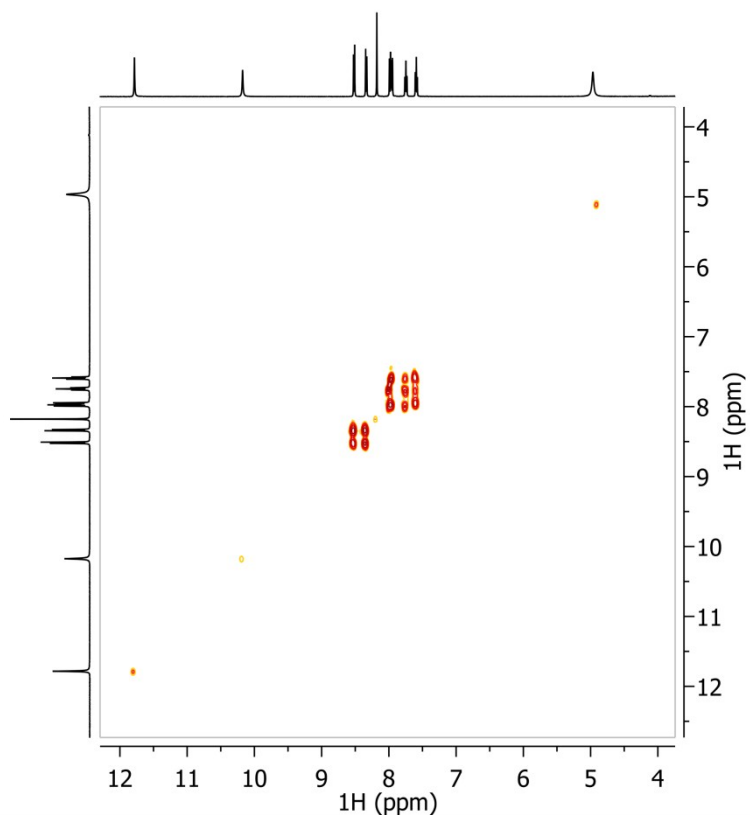

**Figure S 58.** COSY spectrum of S3.

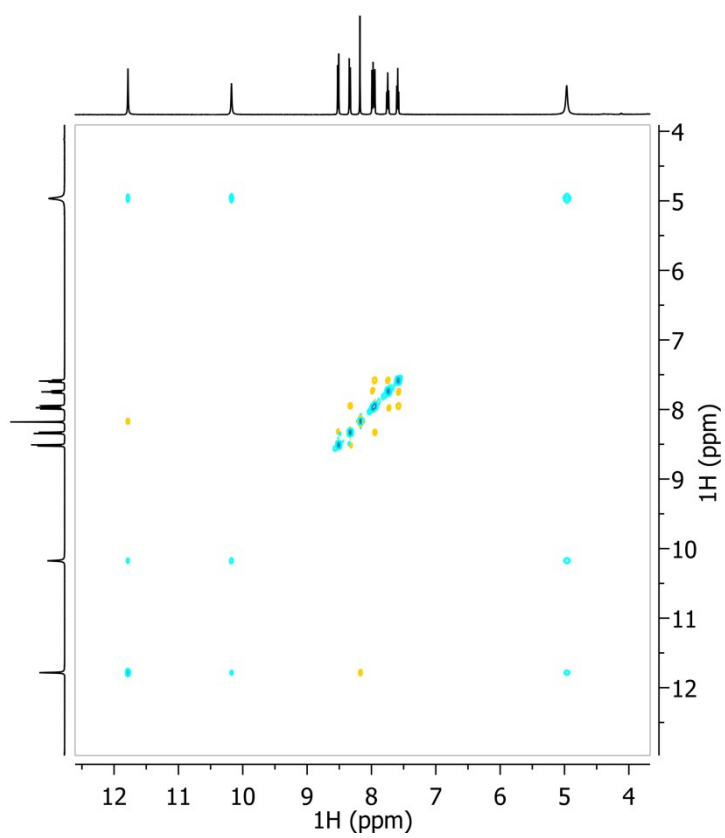

**Figure S 59.** NOESY spectrum of S3.

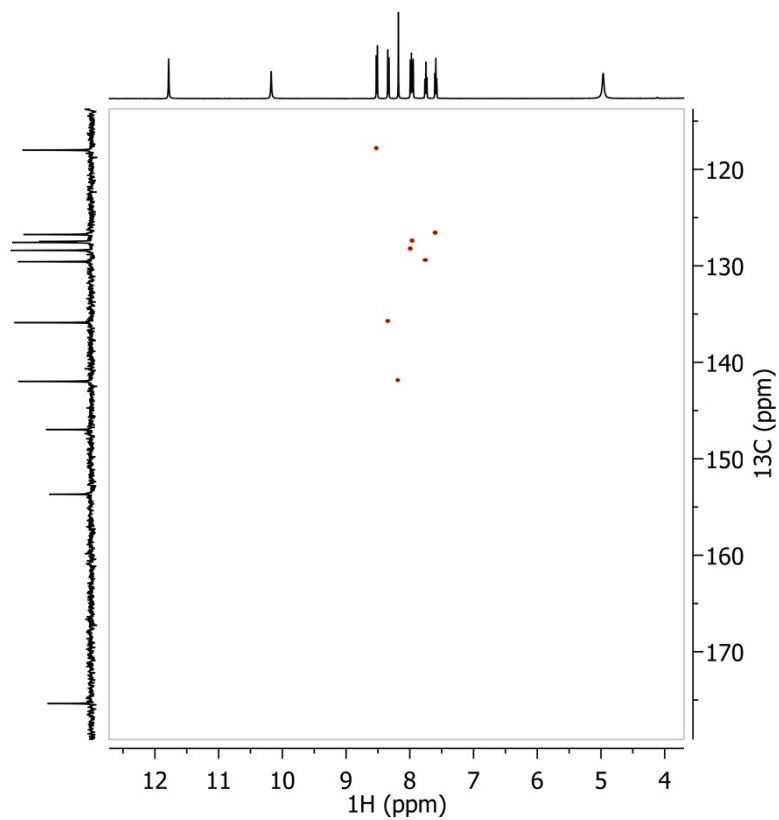

**Figure S 60.**  $^1\text{H}$ - $^{13}\text{C}$  HSQC spectrum of S3.

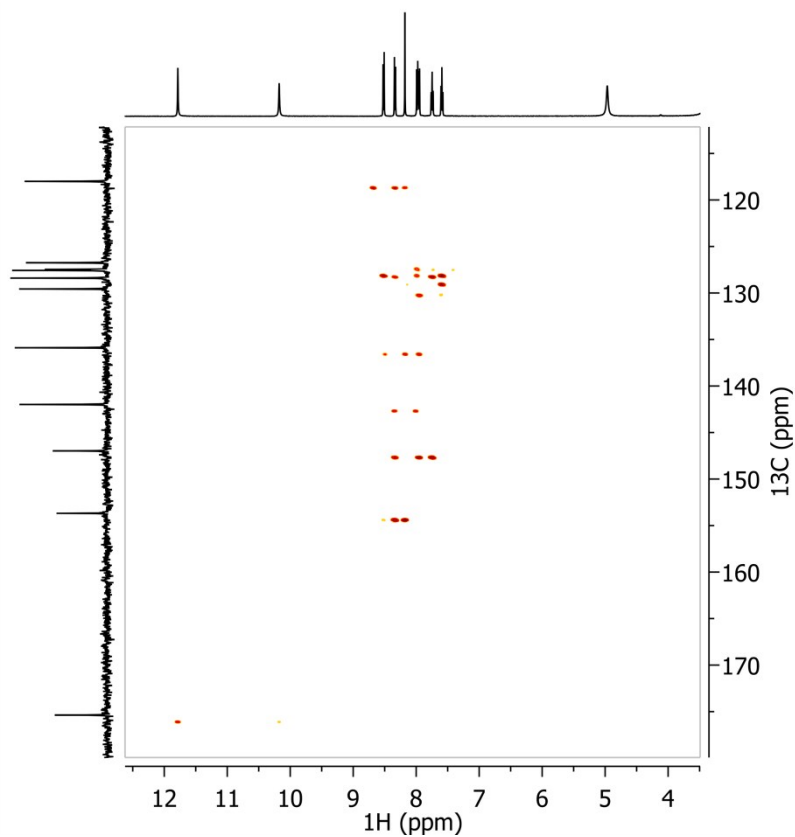

**Figure S 61.**  $^1\text{H}$ - $^{13}\text{C}$  HMBC spectrum of S3.

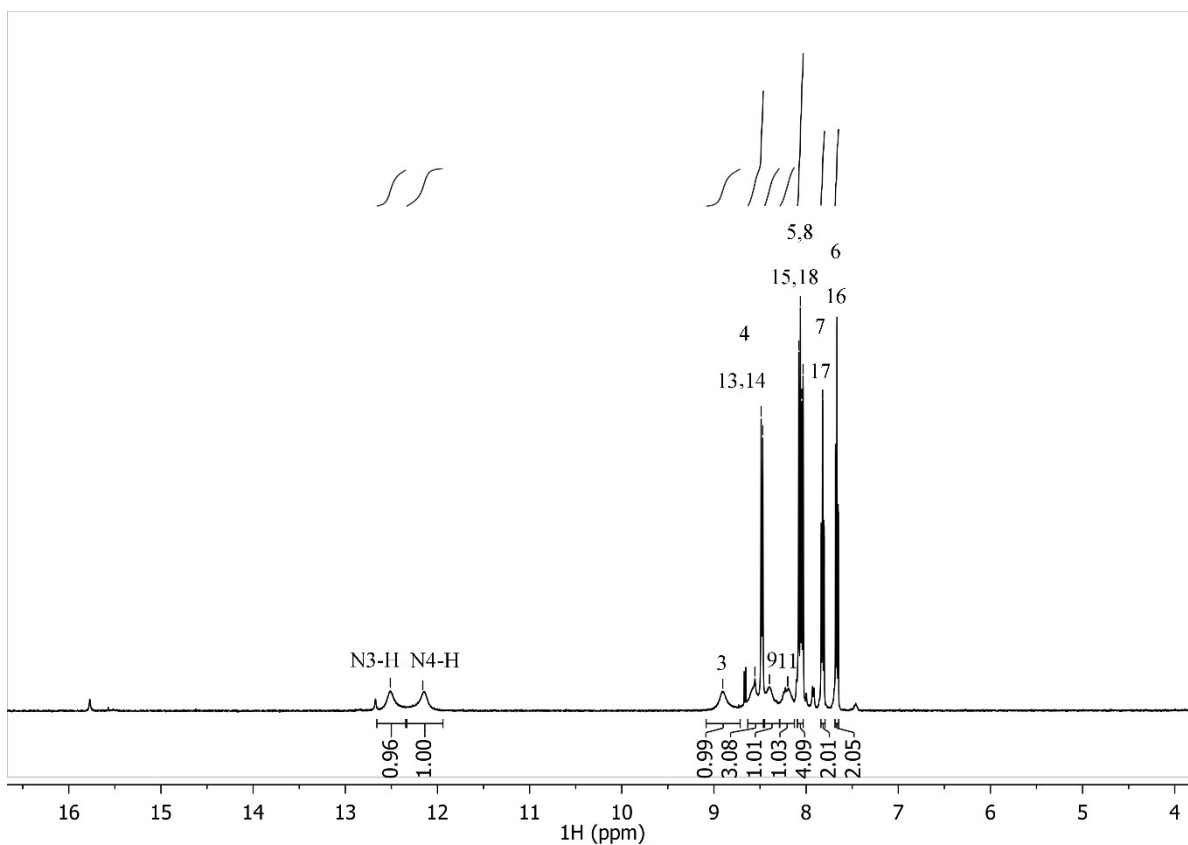

**Figure S 62.**  $^1\text{H}$  NMR spectrum of **S4** in  $\text{DMSO-}d_6$ .

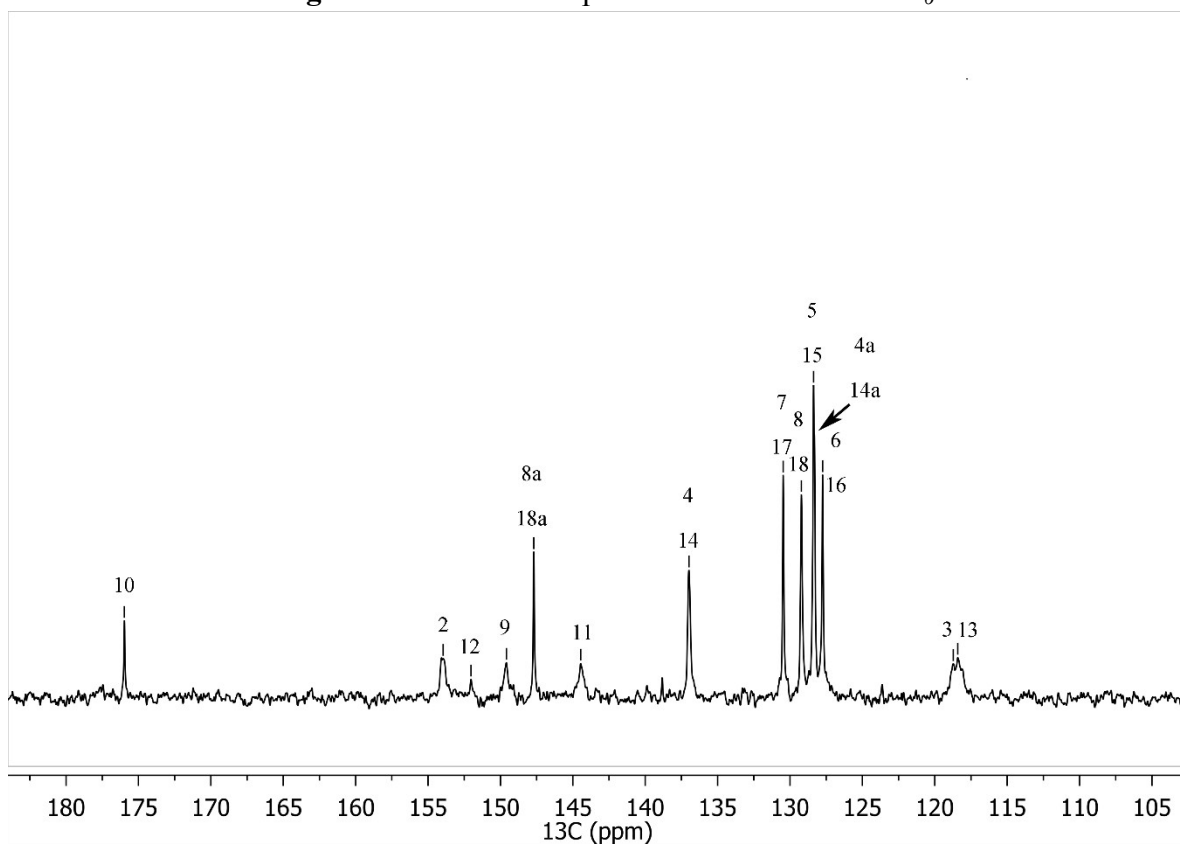

**Figure S 63.**  $^{13}\text{C}$  NMR spectrum of **S4** in  $\text{DMSO-}d_6$ .

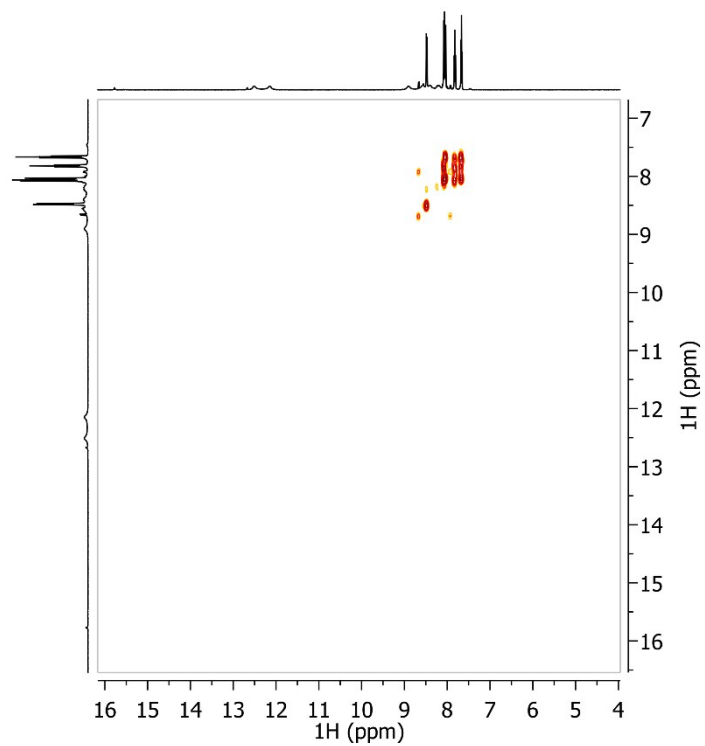

**Figure S 64.** COSY spectrum of S4.

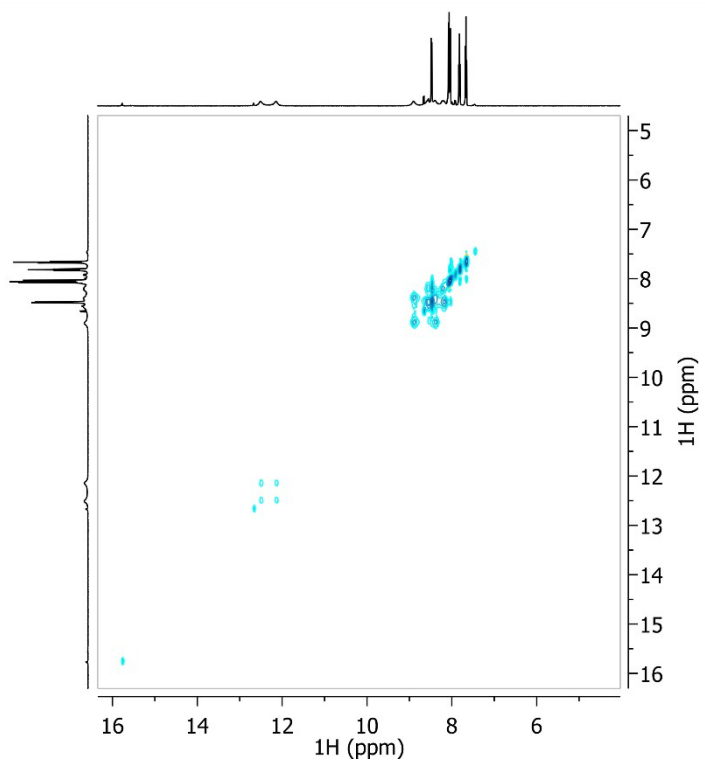

**Figure S 65.** NOESY spectrum of S4.



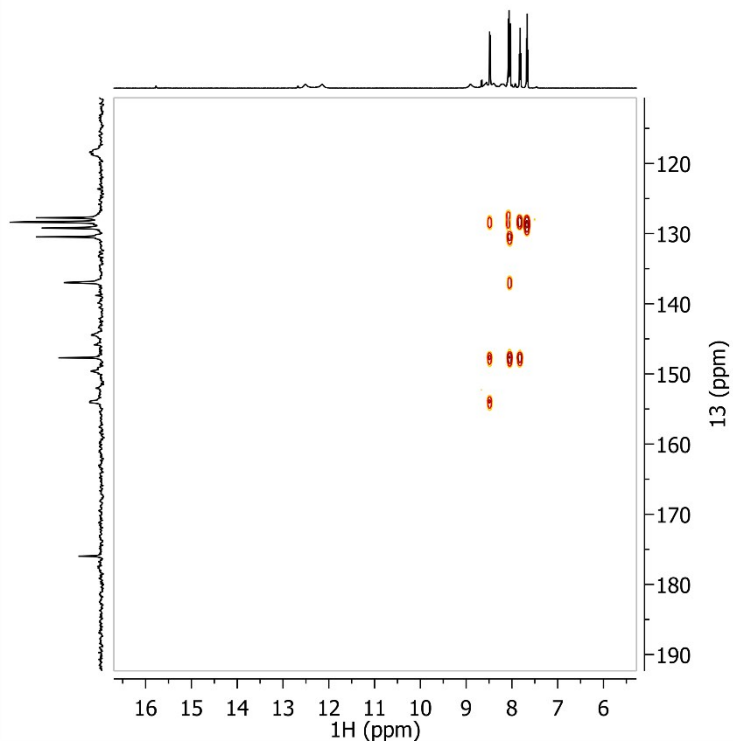

Figure S 66.  $^1\text{H}$ - $^{13}\text{C}$  HSQC spectrum of S4.

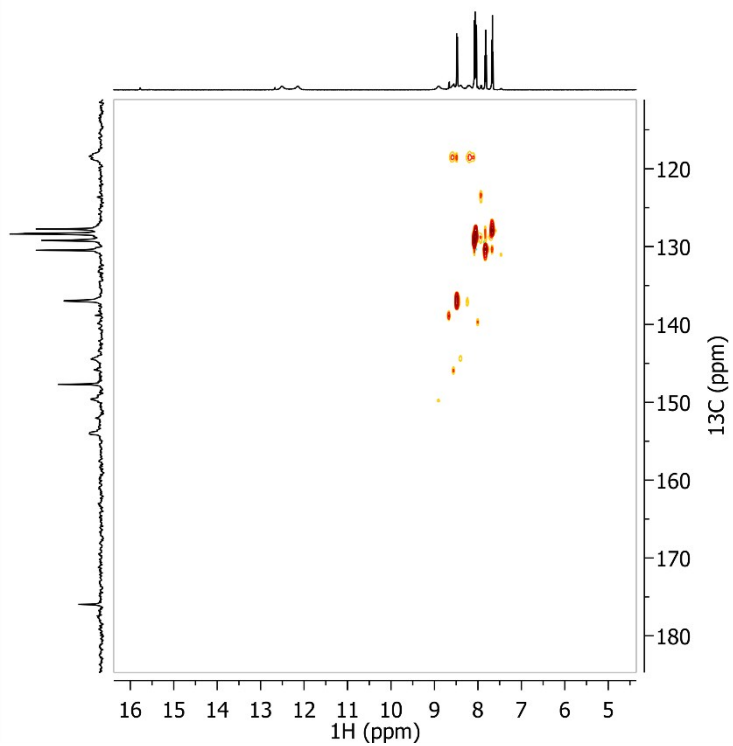

Figure S 67.  $^1\text{H}$ - $^{13}\text{C}$  HMBC spectrum of S4.

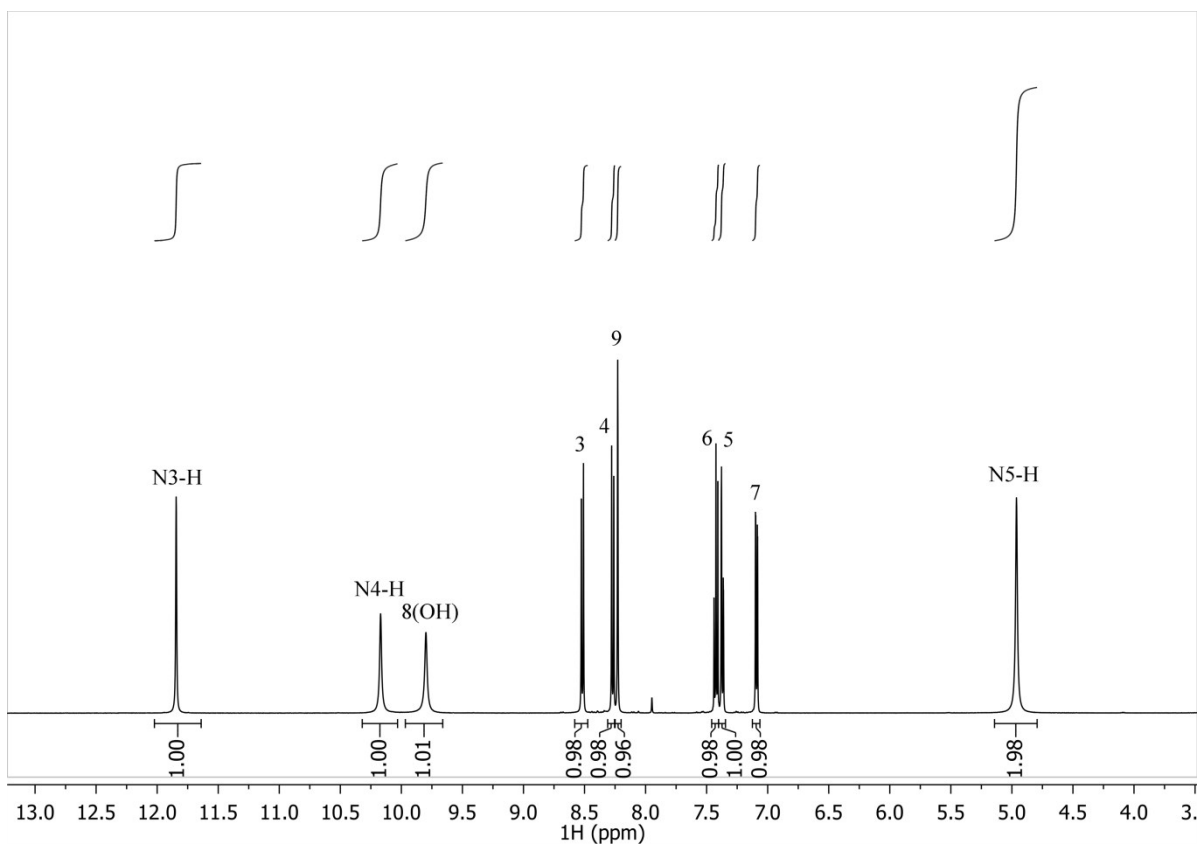

**Figure S 68.**  $^1\text{H}$  NMR spectrum of **S5** in  $\text{DMSO-}d_6$ .

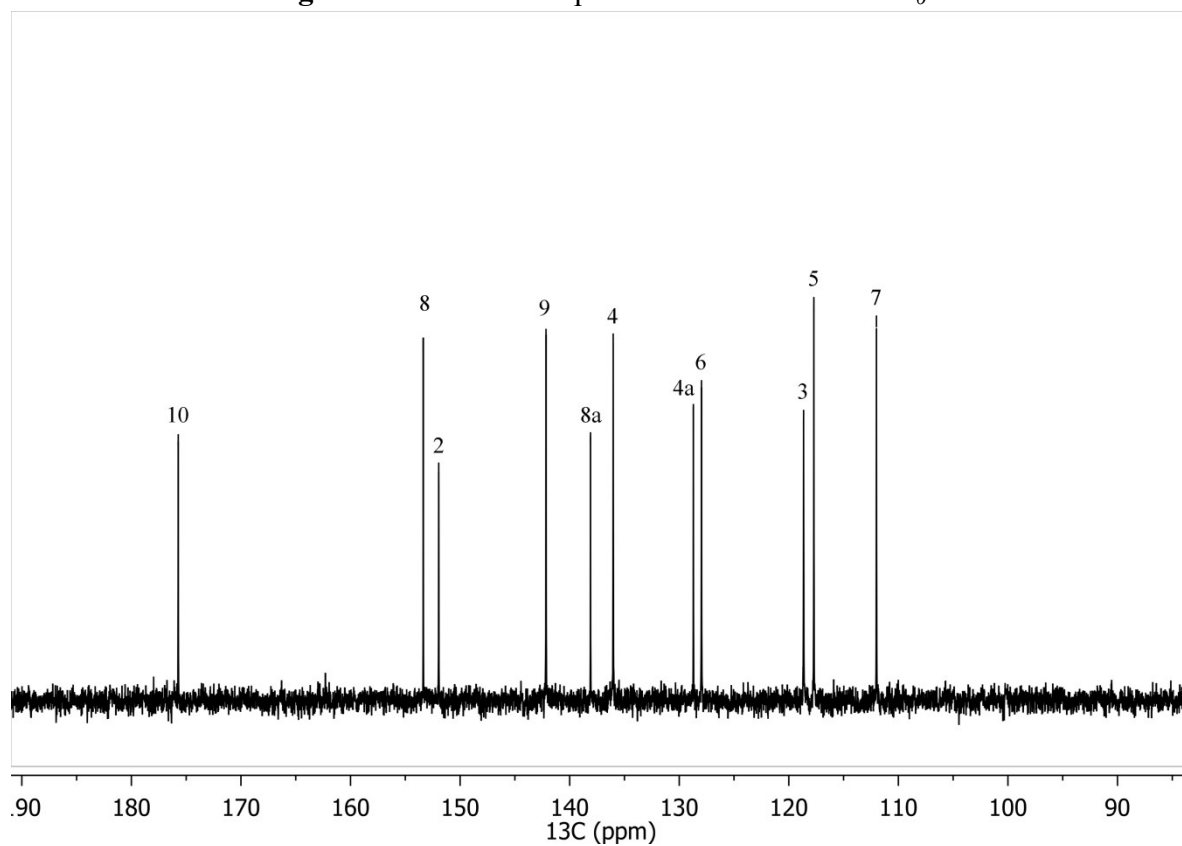

**Figure S 69.**  $^{13}\text{C}$  NMR spectrum of **S5** in  $\text{DMSO-}d_6$ .

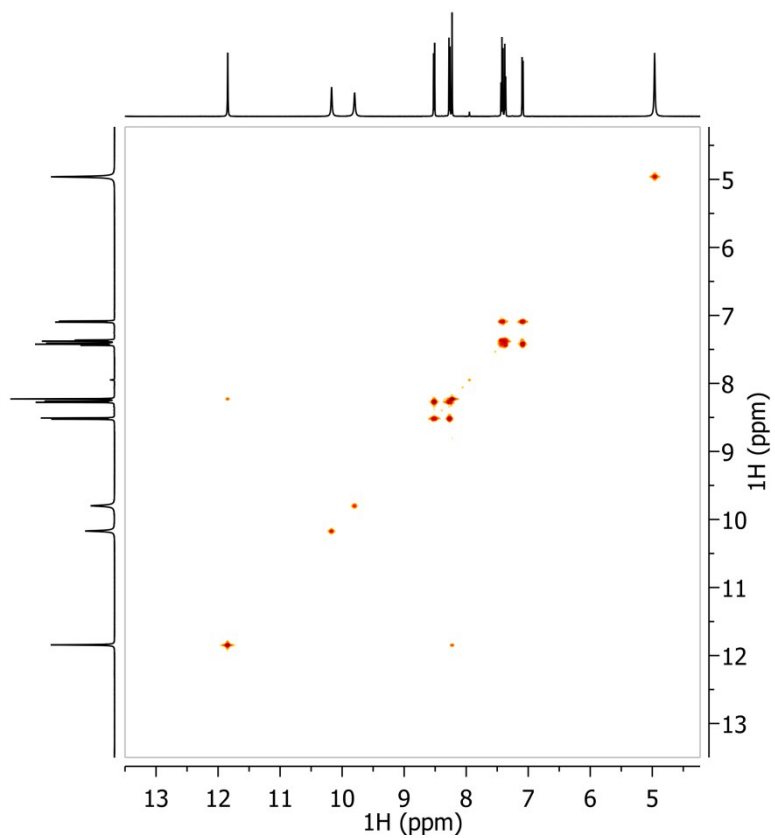

**Figure S 70.** COSY spectrum of S5.

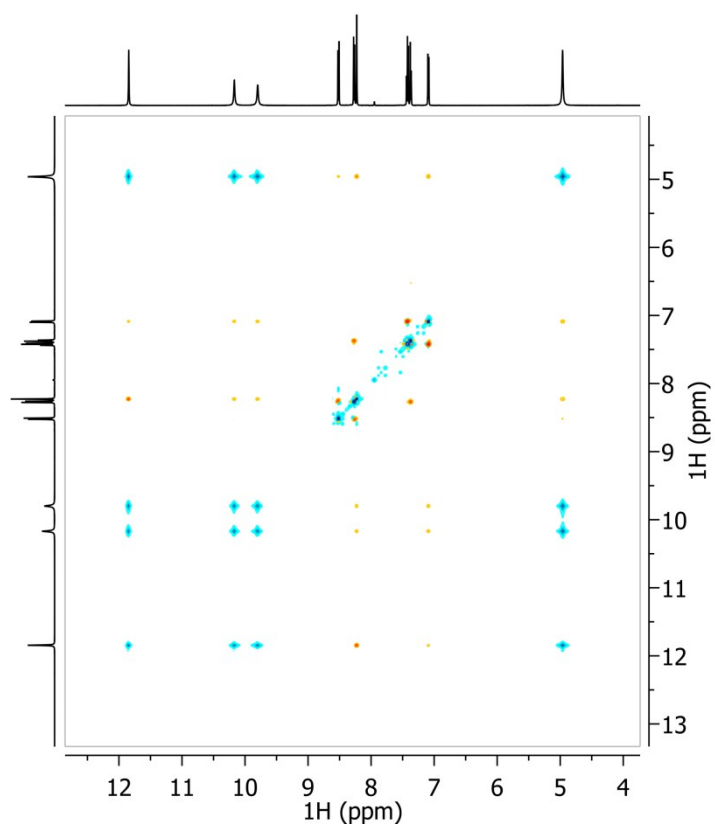

**Figure S 71.** NOESY spectrum of S5.

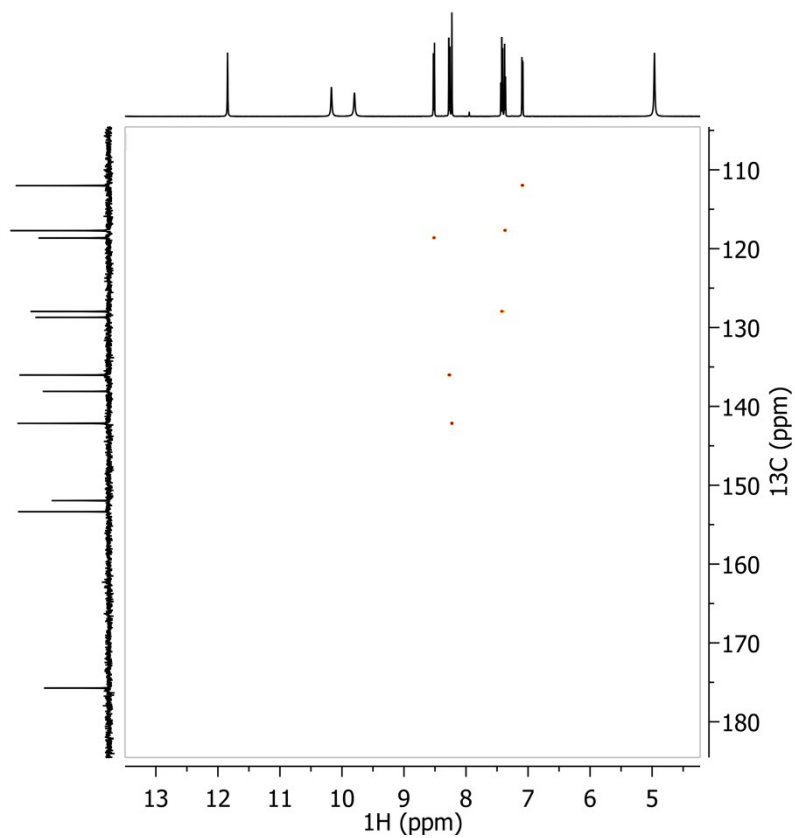

**Figure S 72.**  $^1\text{H}$ - $^{13}\text{C}$  HSQC spectrum of **S5**.

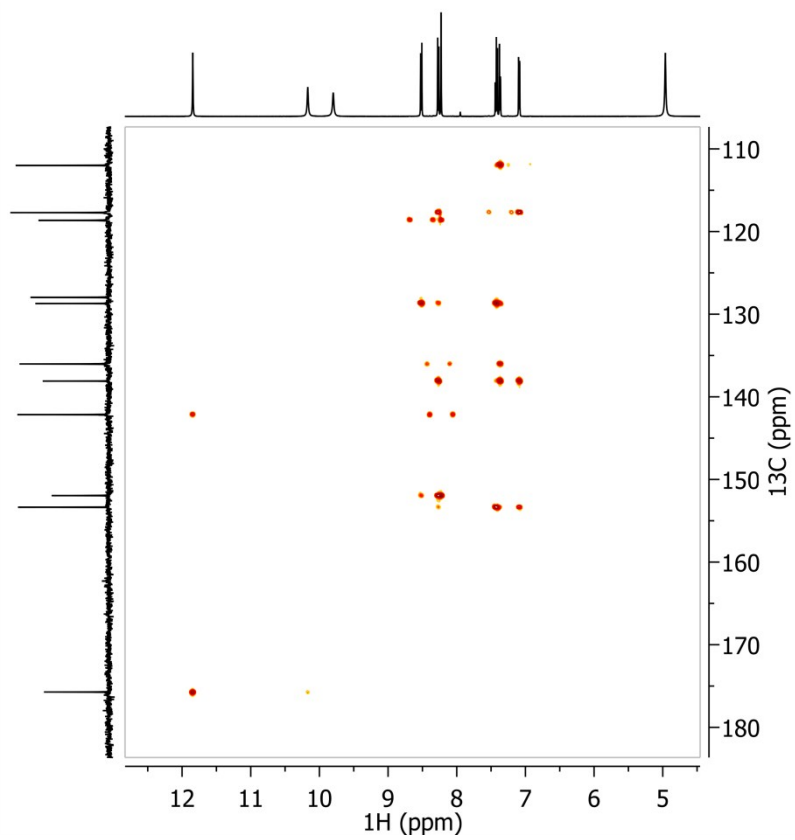

**Figure S 73.**  $^1\text{H}$ - $^{13}\text{C}$  HMBC spectrum of **S5**.

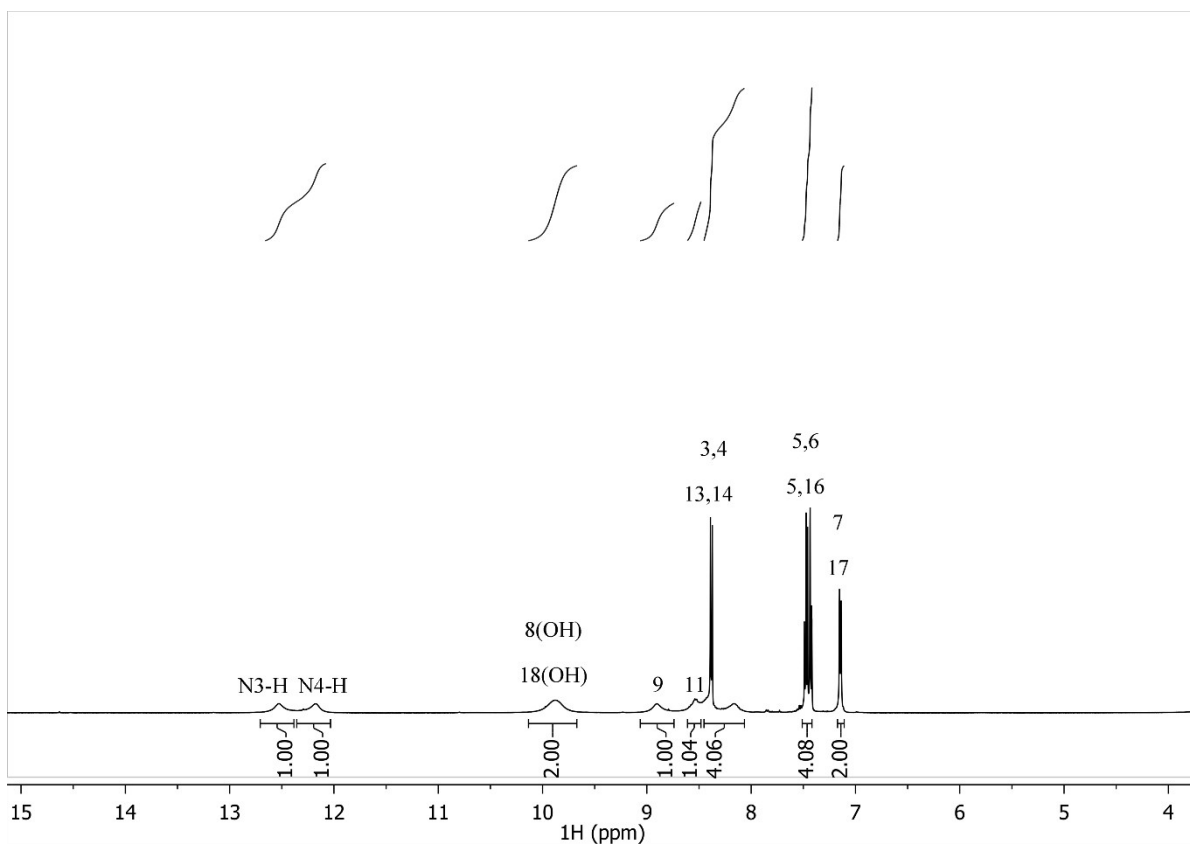

**Figure S 74.**  $^1\text{H}$  NMR spectrum of S6 in  $\text{DMSO-}d_6$ .

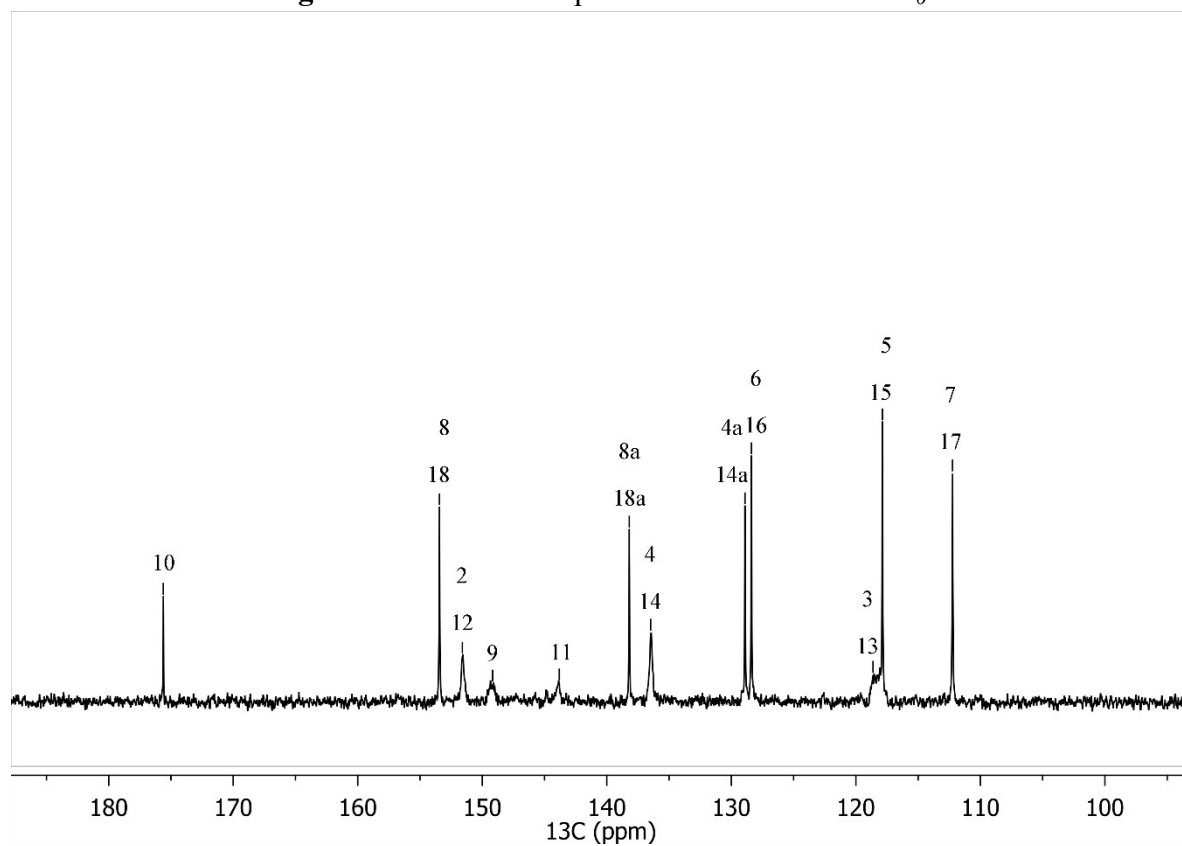

**Figure S 75.**  $^{13}\text{C}$  NMR spectrum of S6 in  $\text{DMSO-}d_6$ .

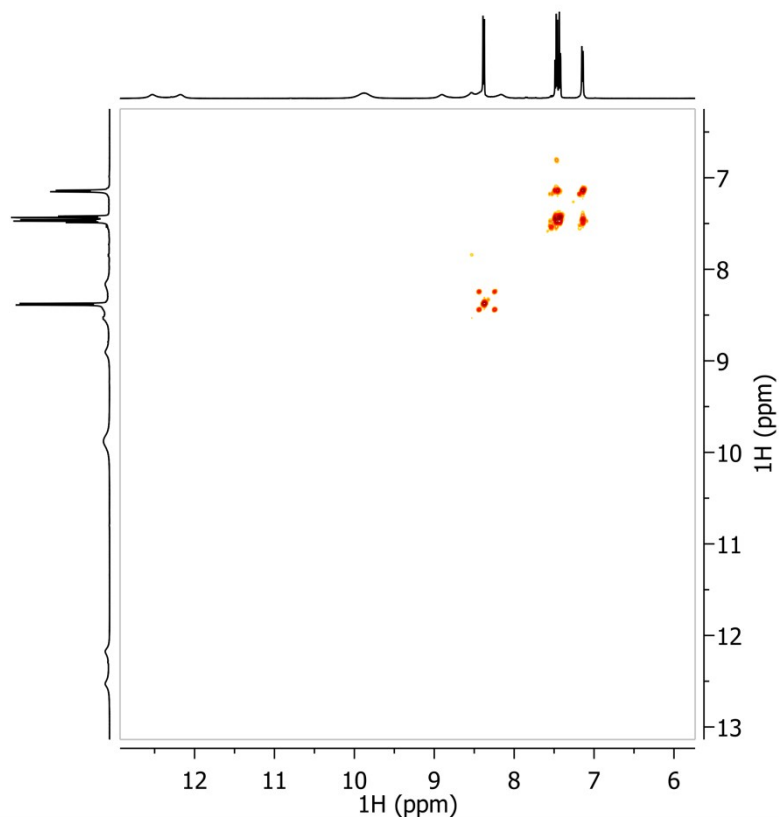

**Figure S 76.** COSY spectrum of S6.

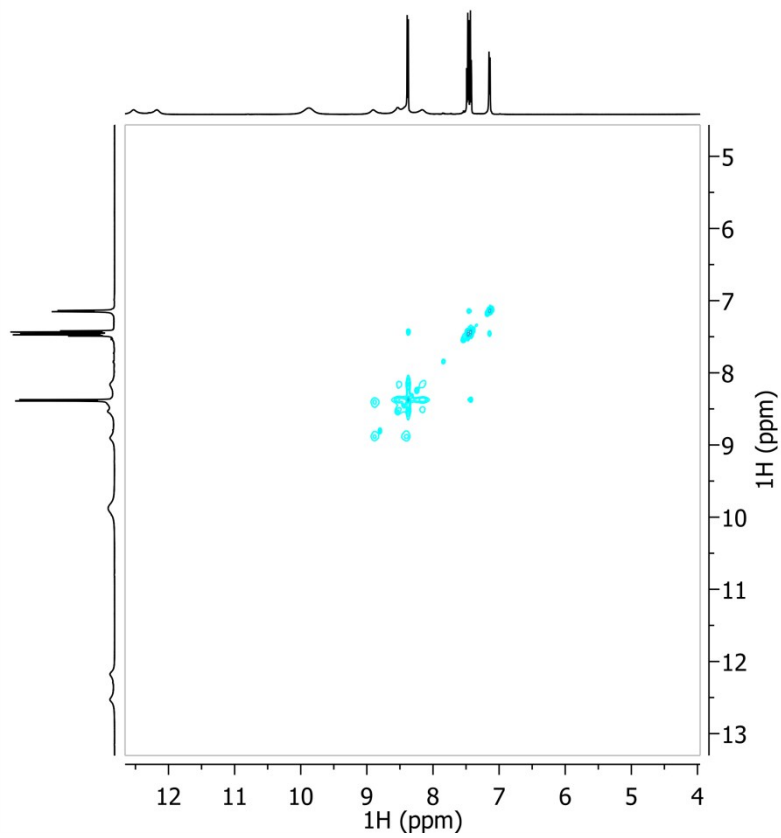

**Figure S 77.** NOESY spectrum of S6.

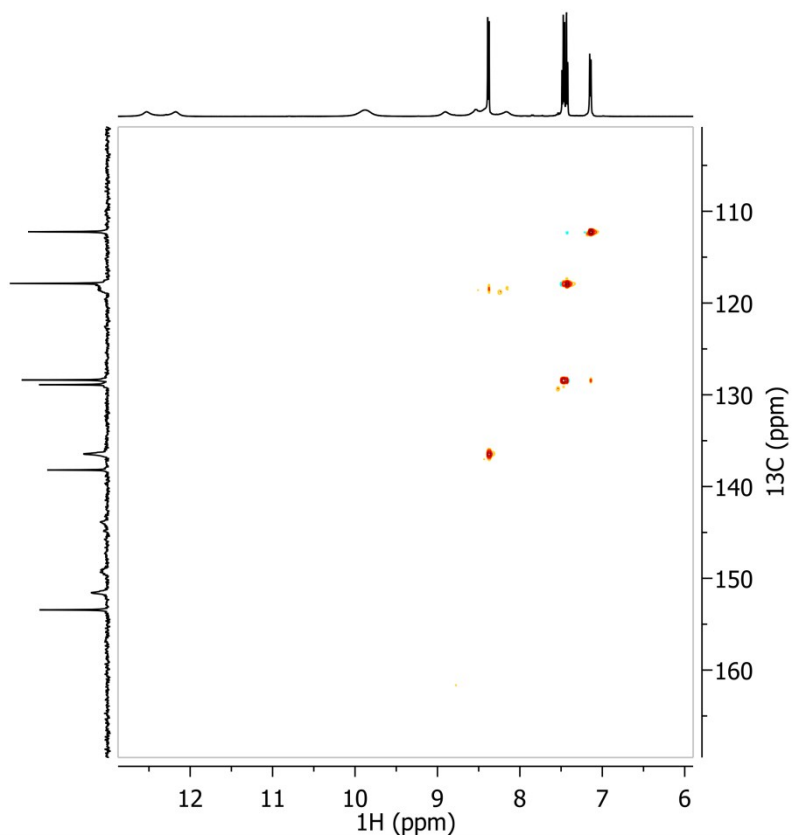

**Figure S 78.**  $^1\text{H}$ - $^{13}\text{C}$  HSQC spectrum of S6.

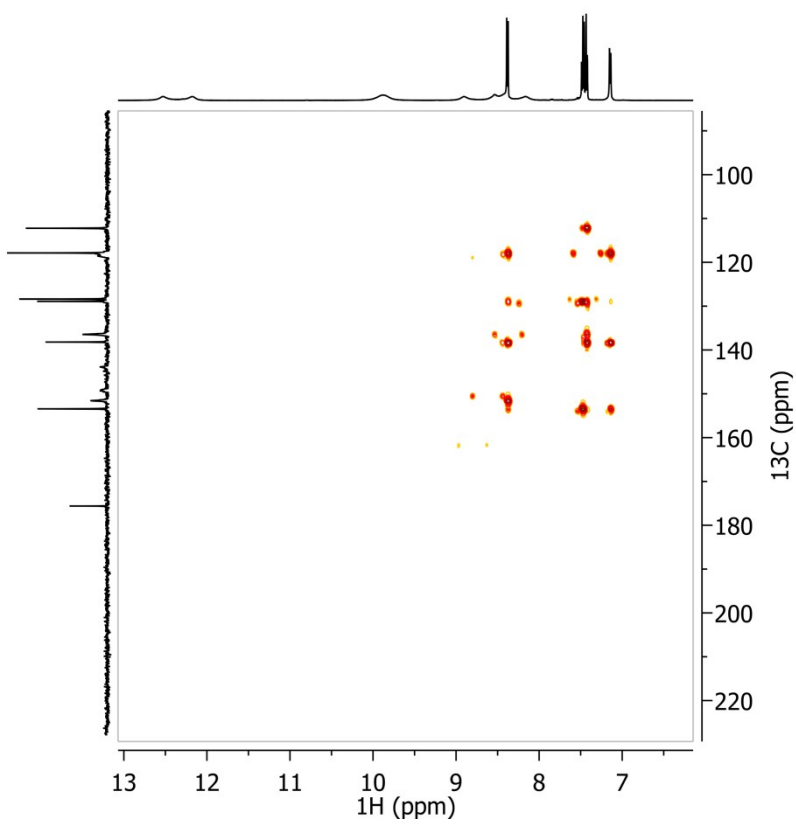

**Figure S 79.**  $^1\text{H}$ - $^{13}\text{C}$  HMBC spectrum of S6.
